# Supplementary material for: Assembly of polycyclic N-heterocycles via copper-catalyzed cycloamination of indolylquinones and aromatic amines
Source: Royal Society of Chemistry journal article supplement (doi:10.1039/d1ob00666e), 2021-01-01

# **Assembly of Polycyclic *N*-Heterocycles via Copper-Catalyzed Cycloamination of Indolylquinones and Aromatic amines**

Yu Dong,<sup>\*a</sup> Ting Mei,<sup>a</sup> Ji-Xian Ye,<sup>a</sup> Xiang-Long Chen,<sup>a</sup> Hui Jiang,<sup>a</sup> Bo Chang,<sup>a</sup> Zhi-Fan Wang,<sup>a</sup> Zhi-Chuan Shi,<sup>b</sup> Zhong-Hui Li<sup>\*a</sup> and Bing He<sup>\*a</sup>

<sup>a</sup> College of Chemistry and Life Science, Sichuan Provincial Key Laboratory for Structural Optimization and Application of Functional Molecules, Chengdu Normal University, Chengdu, 611130, P. R. China.

<sup>b</sup> Southwest Minzu University, Chengdu 610041, P. R. China.

## **Table of Content**

|                         |                                                         |                        |
|-------------------------|---------------------------------------------------------|------------------------|
| <b>1.</b>               | <b>General</b>                                          | <b>information</b>     |
| .....                   |                                                         |                        |
| .....                   |                                                         | <b>S2</b>              |
| <b>2.</b>               | <b>Preparation</b>                                      | <b>of the starting</b> |
| <b>materials</b> .....  |                                                         |                        |
| .....                   |                                                         | <b>S2</b>              |
| <b>3.</b>               | <b>General procedure for the synthesis of compounds</b> |                        |
| <b>3</b> .....          |                                                         | <b>S3</b>              |
| <b>4.</b>               | <b>Optimization</b>                                     | <b>of reaction</b>     |
| <b>conditions</b> ..... |                                                         |                        |
| .....                   |                                                         | <b>S3</b>              |
| <b>5.</b>               | <b>Procedure</b>                                        | <b>for gram-scale</b>  |
| <b>reaction</b> .....   |                                                         |                        |

|                                                                                                         |                 |
|---------------------------------------------------------------------------------------------------------|-----------------|
| .....                                                                                                   | <b>S6</b>       |
| <b>6. Characterization data of products.....</b>                                                        | <b>.....S7</b>  |
| <b>7. References.....</b>                                                                               | <b>.....S18</b> |
| <b>8. Copies of <sup>1</sup>H, <sup>13</sup>C and <sup>19</sup>F NMR spectra for all compounds.....</b> | <b>S18</b>      |

## 1. General information

Chemicals and analytical grade solvents were purchased from commercial suppliers and used without further purification unless otherwise stated. All reagents were weighed and handled in air at room temperature. Analytical thin-layer chromatography was performed on glass plates of Silica Gel GF-254 with detection by UV light (254 and 365 nm). Column chromatography was carried out on silica gel (200-300 mesh). <sup>1</sup>H NMR spectra were recorded at 400 MHz and <sup>13</sup>C NMR spectra were recorded at 101 MHz by using Agilent 400 MHz NMR spectrometer. Chemical shifts were calibrated using residual undeuterated solvent as an internal reference (<sup>1</sup>H NMR: CDCl<sub>3</sub> 7.26 ppm, DMSO-*d*<sub>6</sub> 2.50 ppm, <sup>13</sup>C NMR: CDCl<sub>3</sub> 77.16 ppm, DMSO-*d*<sub>6</sub> 39.52 ppm). Data are reported as follows: chemical shift, multiplicity (s = singlet, br s = broad singlet, d = doublet, t = triplet, q = quartet, m = multiplet), Coupling constants (*J*) were reported in Hertz (Hz). HRMS were performed on a Thermo Scientific LTQ Orbitrap XL instrument. Melting points were measured with micro melting point apparatus.

## 2. Preparation of the starting materials

For this study, *N*-Protected indoles were prepared from substituted indoles with alkyl bromides (iodomethane used for methyl-protected reagent).<sup>1</sup> Indoles-substituted quinones (**1a-1j**) were prepared from *N*-Protected indoles with quinones.<sup>2</sup>

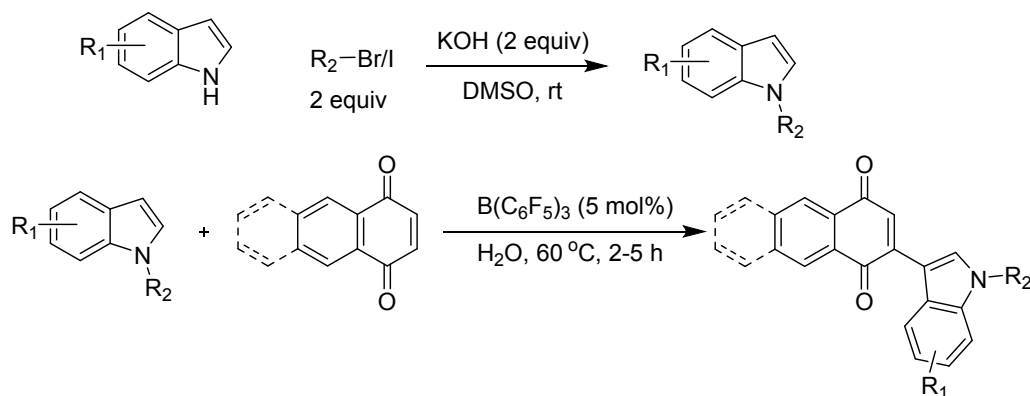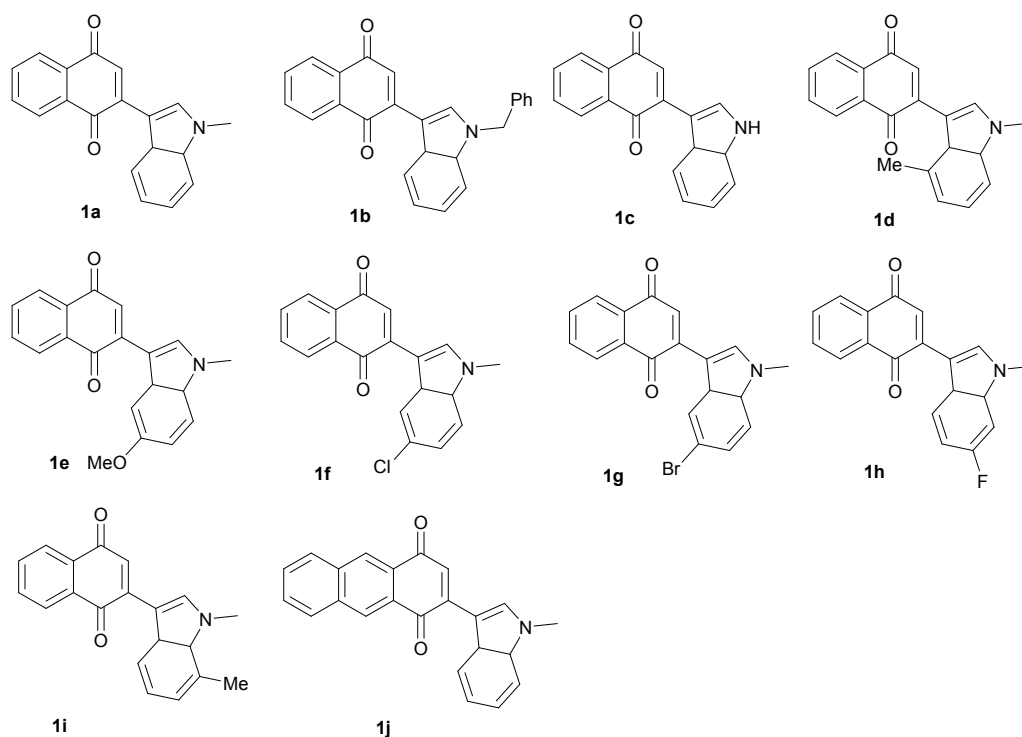

## 3. General procedure for the synthesis of compounds 3

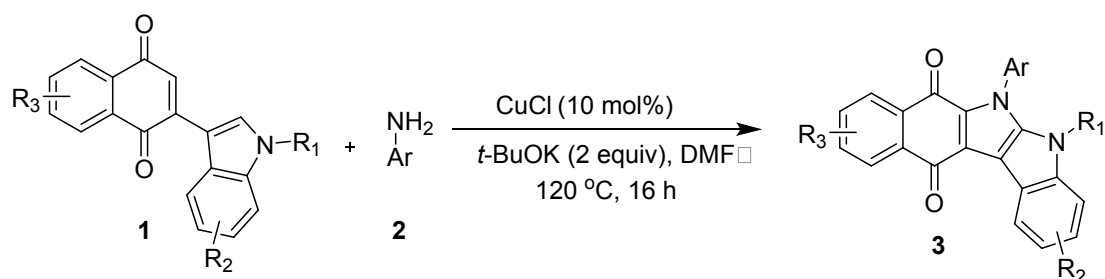

To a solution of indolylquinone **1** (0.3 mmol), CuCl (0.03 mmol, 10 mol%), *t*-BuOK (0.6 mmol, 2 equiv) in DMF (2 mL) was added aromatic amine **2** (0.6 mmol, 2 equiv). The reaction mixture was stirred at 120 °C (oil bath) under air atmosphere for 16 h. After the completion of the reaction (monitored by TLC), and cooled down to room temperature. The reaction was quenched with saturated salt water (10 ml) and the mixture was extracted with EtOAc (3 × 5 mL). The organic extracts were washed with brine, dried over Na<sub>2</sub>SO<sub>4</sub>, filtered and the solvent was removed in vacuo. The crude product was purified by silica gel column chromatography to give **3**.

## 4. Optimization of reaction conditions

**Table S1.** Optimization of catalyst<sup>a</sup>

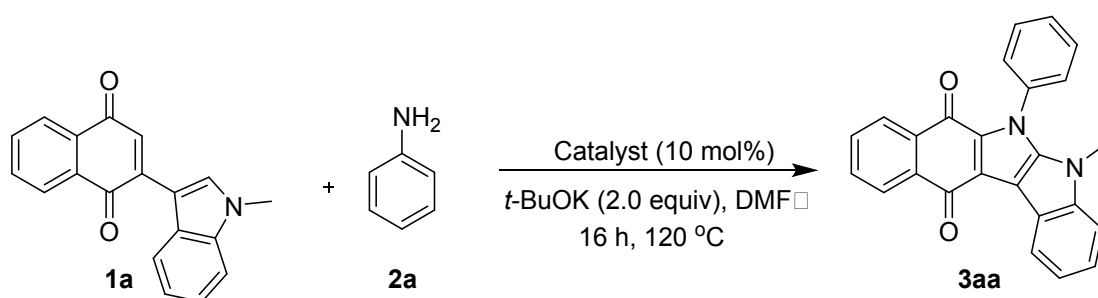

| Entry | catalyst                             | Yield <sup>b</sup> |
|-------|--------------------------------------|--------------------|
| 1     | Cu(OAc) <sub>2</sub>                 | 42                 |
| 2     | Cu(OTf) <sub>2</sub>                 | 45                 |
| 3     | CuSO <sub>4</sub> ·5H <sub>2</sub> O | 36                 |
| 4     | CuCl <sub>2</sub> ·2H <sub>2</sub> O | 39                 |
| 5     | CuCl                                 | 87                 |
| 6     | CuBr <sub>2</sub>                    | 49                 |
| 7     | CuBr                                 | 43                 |
| 8     | CuI                                  | 61                 |
| 9     | No                                   | 15                 |

<sup>a</sup>Reaction conditions: **1a** (0.3 mmol), **2a** (0.6 mmol), catalyst (10 mol%), *t*-BuOK (0.6 mmol), DMF (2.0 mL), 16 h, 120 °C. <sup>b</sup>Isolated yield.

**Table S2.** Optimization of base<sup>a</sup>

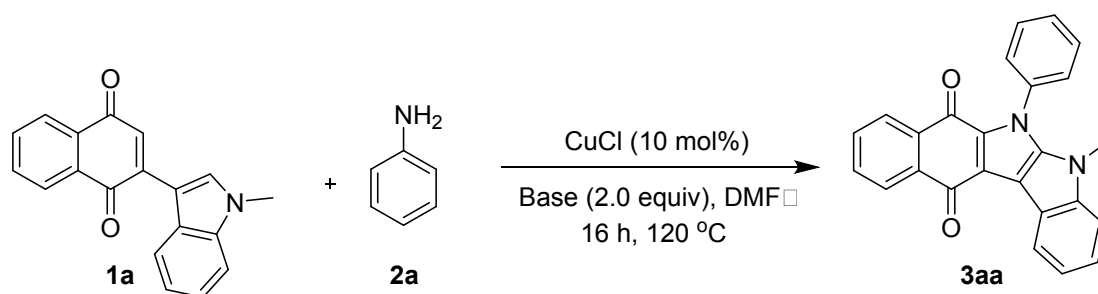

| Entry | Base                            | Yield <sup>b</sup> |
|-------|---------------------------------|--------------------|
| 1     | <i>t</i> -BuOK                  | 87                 |
| 2     | <i>t</i> -BuONa                 | 60                 |
| 3     | K <sub>2</sub> CO <sub>3</sub>  | 32                 |
| 4     | Na <sub>2</sub> CO <sub>3</sub> | 36                 |
| 5     | KOH                             | 51                 |
| 6     | NaOH                            | 63                 |
| 7     | CH <sub>3</sub> ONa             | 41                 |
| 8     | Cs <sub>2</sub> CO <sub>3</sub> | 46                 |
| 9     | Et <sub>3</sub> N               | NR                 |
| 10    | DMAP                            | NR                 |
| 11    | No                              | NR                 |

<sup>a</sup>Reaction conditions: **1a** (0.3 mmol), **2a** (0.6 mmol), CuCl (10 mol%), Base (2.0 equiv), DMF (2.0 mL), 16 h, 120 °C. <sup>b</sup>Isolated yield. N.R. = no reaction.

**Table S3.** Optimization of solvents<sup>a</sup>

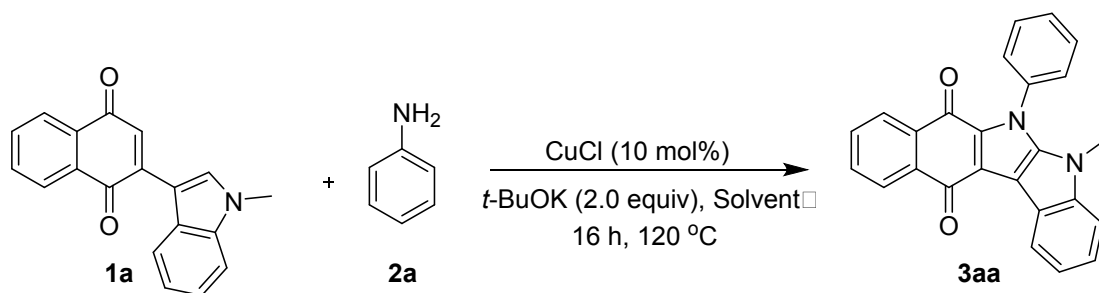

| Entry | Solvent                         | Yield <sup>b</sup> |
|-------|---------------------------------|--------------------|
| 1     | DMF                             | 87                 |
| 2     | DMAC                            | 52                 |
| 3     | NMP                             | NR                 |
| 4     | EtOH                            | NR                 |
| 5     | CH <sub>3</sub> NO <sub>2</sub> | NR                 |
| 6     | Dioxane                         | NR                 |
| 7     | DCE                             | NR                 |
| 8     | CH <sub>3</sub> CN              | NR                 |
| 9     | Toluene                         | NR                 |
| 10    | PhCF <sub>3</sub>               | NR                 |
| 11    | DMSO                            | 31                 |

<sup>a</sup>Reaction conditions: **1a** (0.3 mmol), **2a** (0.6 mmol), CuCl (10 mol%), *t*-BuOK (2.0 equiv), Solvent (2.0 mL), 16 h, 120 °C. <sup>b</sup>Isolated yield. DMF = *N,N*-Dimethylformamide; DMAC = *N,N*-Dimethylacetamide; NMP = *N*-Methyl pyrrolidone; DMSO = Dimethyl sulfoxide; N.R. = no reaction.

**Table S4.** Optimization of dosages<sup>a</sup>

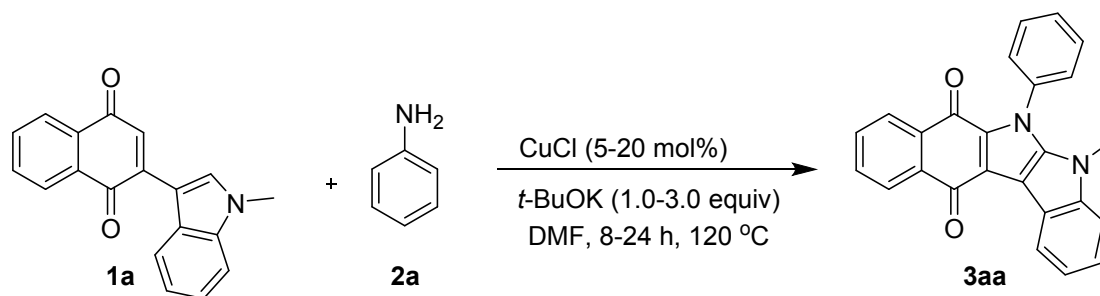

| Entry           | <b>2a</b><br>(equiv) | CuCl<br>(mol %) | <i>t</i> -BuOK<br>(equiv) | t (h) | Yield <sup>b</sup> |
|-----------------|----------------------|-----------------|---------------------------|-------|--------------------|
| 1               | 2.0                  | 5               | 2.0                       | 16    | 75                 |
| 2               | 2.0                  | 10              | 2.0                       | 16    | 87                 |
| 3               | 2.0                  | 20              | 2.0                       | 16    | 81                 |
| 4               | 2.0                  | 10              | 1.0                       | 16    | 65                 |
| 5               | 2.0                  | 10              | 3.0                       | 16    | 78                 |
| 6               | 1.0                  | 10              | 2.0                       | 16    | 71                 |
| 7               | 1.5                  | 10              | 2.0                       | 16    | 78                 |
| 8               | 3.0                  | 10              | 2.0                       | 16    | 79                 |
| 9               | 2.0                  | 10              | 2.0                       | 24    | 85                 |
| 10              | 2.0                  | 10              | 2.0                       | 8     | 62                 |
| 11 <sup>c</sup> | 2.0                  | 10              | 2.0                       | 16    | 73                 |
| 12 <sup>d</sup> | 2.0                  | 10              | 2.0                       | 16    | 82                 |

<sup>a</sup>Reaction conditions: **1a** (0.3 mmol), **2a** (0.3-0.9 mmol), CuCl (5-20 mol%), *t*-BuOK (1.0-3.0 equiv), DMF (2.0 mL), 8-24 h, 120 °C. <sup>b</sup>Isolated yield. <sup>c</sup>DMF (1.0 mL). <sup>d</sup>DMF (3.0 mL).

**Table S5.** Optimization of temperature<sup>a</sup>

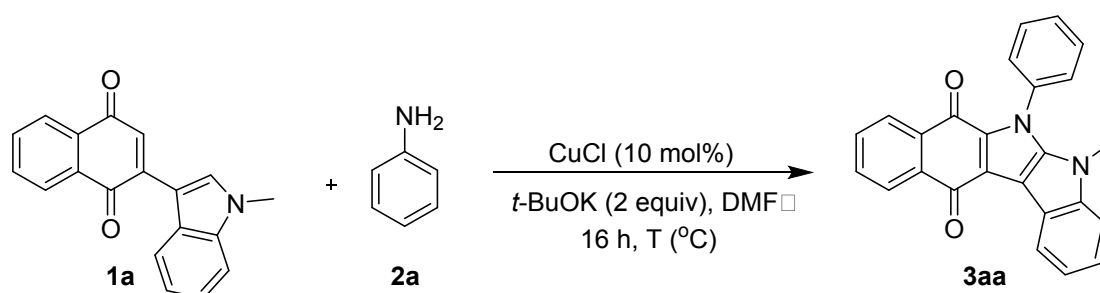

| Entry | T (°C) | Yield <sup>b</sup> |
|-------|--------|--------------------|
| 1     | 80     | 55                 |
| 2     | 100    | 70                 |
| 3     | 110    | 76                 |
| 4     | 120    | 87                 |
| 5     | 140    | 81                 |

<sup>a</sup>Reaction conditions: **1a** (0.3 mmol), **2a** (0.6 mmol), CuCl (10 mol%), *t*-BuOK

(2.0 equiv), DMF (2.0 mL), 16 h, 80-140 °C. <sup>b</sup>Isolated yield.

## 5. Procedure for gram-scale reaction

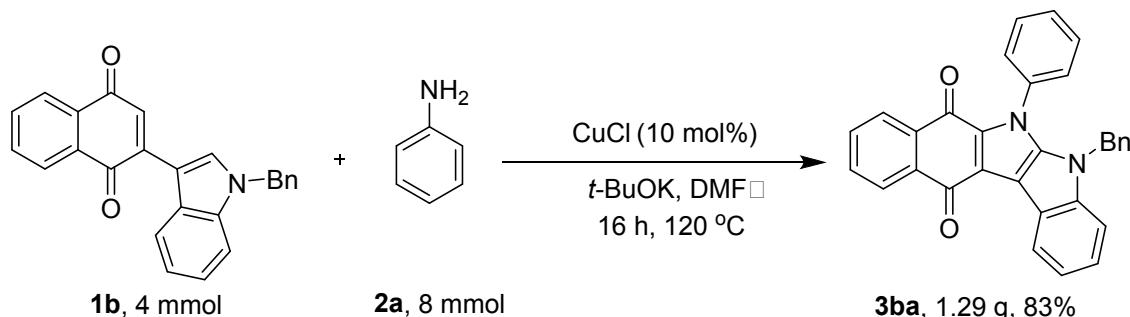

To a solution of indolynaphthoquinone **1b** (1.45 g), CuCl (39.6 mg, 10 mol%), *t*-BuOK (896 mg, 2.0 equiv) in DMF (26 mL) was added aniline **2a** (745 mg, 2.0 equiv). The reaction mixture was stirred at 120 °C (oil bath) under air atmosphere for 16 h. After the completion of the reaction (monitored by TLC), and cooled down to room temperature. The reaction was quenched with saturated salt water (100 ml) and the mixture was extracted with EtOAc (3 × 50 mL). The organic extracts were washed with brine, dried over Na<sub>2</sub>SO<sub>4</sub>, filtered and the solvent was removed in vacuo. The crude product was purified by silica gel column chromatography to give **3ba** in 83% yield.

## 6. Characterization data of products

### 2-(1-methyl-1H-indol-3-yl)-3-(phenylamino)naphthalene-1,4-dione (4a)

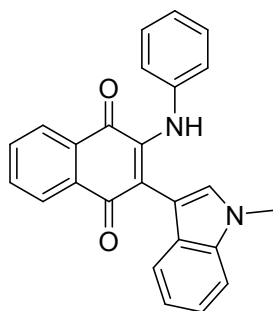

Black solid, 63% yield; mp 206-208 °C. <sup>1</sup>H NMR (400 MHz, DMSO-*d*<sub>6</sub>) δ 8.73 (s, 1H), 8.07 (dd, *J* = 16.0, 7.5 Hz, 2H), 7.83 (dt, *J* = 21.7, 7.4 Hz, 2H), 7.25 (s, 1H), 7.21 (d, *J* = 7.9 Hz, 1H), 7.16 (d, *J* = 8.1 Hz, 1H), 6.98 (t, *J* = 7.5 Hz, 1H), 6.89 (t, *J* = 7.4 Hz, 1H), 6.72 – 6.46 (m, 5H), 3.63 (s, 3H). <sup>13</sup>C NMR (101 MHz, DMSO-*d*<sub>6</sub>) δ 182.8, 182.3, 141.1, 138.8, 136.4, 134.8, 133.4, 133.2, 132.4, 131.2, 129.8, 126.7, 126.5, 126.3, 126.1, 122.3, 121.5, 121.1, 120.9, 119.3, 114.8, 109.6, 107.0, 32.8. HRMS calcd. For C<sub>25</sub>H<sub>19</sub>N<sub>2</sub>O<sub>2</sub><sup>+</sup> (M+H)<sup>+</sup> 379.1447 found: 379.1441.

### 5-methyl-6-(*p*-tolyl)-5,6-dihydrobenzo[*f*]indolo[2,3-*b*]indole-7,12-dione (3ab)<sup>3</sup>

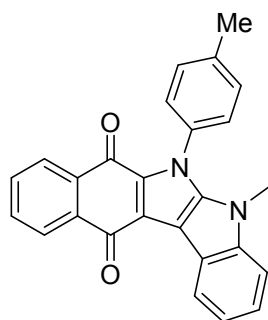

Red solid, 88% yield; mp 271-273 °C.  $^1\text{H}$  NMR (400 MHz,  $\text{CDCl}_3$ )  $\delta$  8.36 (d,  $J = 7.2$  Hz, 1H), 8.16 (s, 1H), 7.97 (s, 1H), 7.59 (s, 2H), 7.46 (s, 2H), 7.41 (s, 2H), 7.33 – 7.27 (m, 2H), 7.20 (d,  $J = 7.5$  Hz, 1H), 3.28 (s, 3H), 2.51 (s, 3H).  $^{13}\text{C}$  NMR (101 MHz,  $\text{CDCl}_3$ )  $\delta$  181.90, 174.12, 144.10, 143.59, 139.92, 134.77, 133.81, 133.19, 133.05, 132.25, 130.34, 130.10, 129.78, 127.78, 127.59, 126.01, 124.15, 122.70, 121.55, 121.09, 120.04, 109.25, 29.69, 21.45.

**6-(4-methoxyphenyl)-5-methyl-5,6-dihydrobenzo[f]indolo[2,3-b]indole-7,12-dione (3ac)<sup>3</sup>**

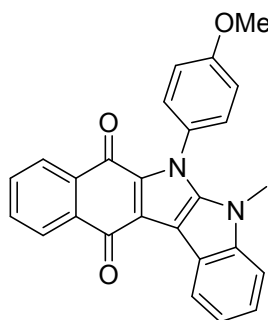

Red solid, 83% yield; mp 262-264 °C.  $^1\text{H}$  NMR (400 MHz,  $\text{CDCl}_3$ )  $\delta$  8.34 (d,  $J = 7.1$  Hz, 1H), 8.15 (s, 1H), 7.95 (s, 1H), 7.58 (s, 2H), 7.51 (d,  $J = 7.5$  Hz, 2H), 7.35 – 7.26 (m, 2H), 7.17 (d,  $J = 7.5$  Hz, 1H), 7.10 (d,  $J = 7.6$  Hz, 2H), 3.93 (s, 3H), 3.28 (s, 3H).  $^{13}\text{C}$  NMR (101 MHz,  $\text{CDCl}_3$ )  $\delta$  181.88, 174.14, 160.27, 143.51, 134.71, 133.05, 132.24, 128.93, 125.97, 124.12, 122.62, 121.04, 119.93, 114.57, 109.25, 55.58, 30.05.

**6-(4-aminophenyl)-5-methyl-5,6-dihydrobenzo[f]indolo[2,3-b]indole-7,12-dione (3ad)<sup>3</sup>**

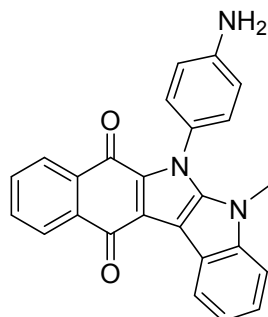

Red solid, 79% yield; mp 271-273 °C.  $^1\text{H}$  NMR (400 MHz,  $\text{CDCl}_3$ )  $\delta$  8.36 (d,  $J = 7.4$  Hz, 1H), 8.19 – 8.14 (m, 1H), 8.01 – 7.95 (m, 1H), 7.59 (p,  $J = 6.8$  Hz, 3H), 7.35 –



7.20 (m, 6H), 6.83 (d,  $J = 8.5$  Hz, 2H), 3.34 (s, 3H).  $^{13}\text{C}$  NMR (101 MHz,  $\text{CDCl}_3$ )  $\delta$  181.93, 174.15, 147.65, 143.61, 134.85, 133.20, 132.99, 132.18, 130.51, 128.63, 126.68, 126.01, 125.95, 124.07, 122.65, 121.35, 120.99, 120.06, 115.23, 109.22, 30.01.

**6-(4-fluorophenyl)-5-methyl-5,6-dihydrobenzo[f]indolo[2,3-b]indole-7,12-dione**  
**(3ae)**<sup>3</sup>

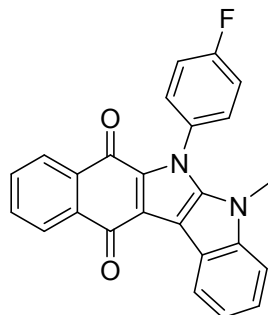

Red solid, 60% yield; mp 261-263 °C.  $^1\text{H}$  NMR (400 MHz,  $\text{CDCl}_3$ )  $\delta$  8.34 (d,  $J = 7.0$  Hz, 1H), 8.17 – 8.11 (m, 1H), 7.96 – 7.90 (m, 1H), 7.62 – 7.56 (m, 4H), 7.35 – 7.24 (m, 5H), 7.17 (d,  $J = 7.8$  Hz, 1H), 3.27 (s, 3H).  $^{13}\text{C}$  NMR (101 MHz,  $\text{CDCl}_3$ )  $\delta$  181.72, 174.10, 164.26, 161.77, 145.12, 143.46, 134.55, 133.07, 133.03, 132.43, 132.40, 132.29, 129.84, 129.75, 125.99, 125.93, 124.24, 122.64, 121.64, 121.17, 119.89, 116.64, 116.41, 109.26, 108.20, 30.11.  $^{19}\text{F}$  NMR (376 MHz,  $\text{CDCl}_3$ )  $\delta$  110.36.

**6-(4-chlorophenyl)-5-methyl-5,6-dihydrobenzo[f]indolo[2,3-b]indole-7,12-dione**  
**(3af)**<sup>3</sup>

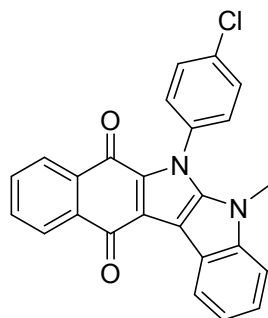

Red solid, 62% yield; mp 263-265 °C.  $^1\text{H}$  NMR (400 MHz,  $\text{CDCl}_3$ )  $\delta$  8.38 (d,  $J = 7.6$  Hz, 1H), 8.20 – 8.14 (m, 1H), 7.98 (dd,  $J = 5.6, 3.3$  Hz, 1H), 7.64 – 7.52 (m, 6H), 7.31 (dd,  $J = 15.0, 7.5$  Hz, 2H), 7.22 (s, 1H), 3.32 (s, 3H).  $^{13}\text{C}$  NMR (101 MHz,  $\text{CDCl}_3$ )  $\delta$  181.82, 174.20, 145.05, 143.52, 135.88, 134.96, 134.56, 133.21, 132.45, 129.75, 129.27, 126.13, 126.01, 124.38, 122.76, 121.31, 119.92, 109.37, 30.29.

**6-(4-bromophenyl)-5-methyl-5,6-dihydrobenzo[f]indolo[2,3-b]indole-7,12-dione**  
**(3ag)**<sup>3</sup>

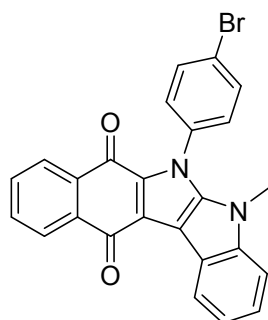

Red solid, 65% yield; mp 251-253 °C.  $^1\text{H}$  NMR (400 MHz,  $\text{CDCl}_3$ )  $\delta$  8.37 (d,  $J = 7.4$  Hz, 1H), 8.19 – 8.15 (m, 1H), 7.99 – 7.95 (m, 1H), 7.76 – 7.72 (m, 2H), 7.63 – 7.60 (m, 2H), 7.50 – 7.46 (m, 2H), 7.36 – 7.29 (m, 2H), 7.21 (s, 1H), 3.32 (s, 3H).  $^{13}\text{C}$  NMR (101 MHz,  $\text{CDCl}_3$ )  $\delta$  181.76, 174.16, 144.93, 143.51, 135.51, 134.55, 133.18, 133.08, 132.72, 132.42, 130.15, 129.58, 126.11, 125.99, 124.36, 123.94, 123.86, 122.73, 121.29, 119.91, 109.35, 108.38, 29.68.

**6-(3-methoxyphenyl)-5-methyl-5,6-dihydrobenzo[f]indolo[2,3-b]indole-7,12-dione (3ah)<sup>3</sup>**

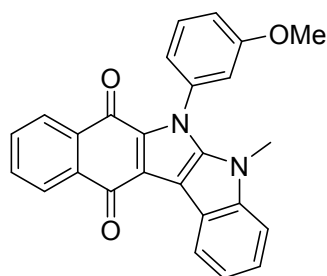

Red solid, 83% yield; mp 283-285 °C.  $^1\text{H}$  NMR (400 MHz,  $\text{CDCl}_3$ )  $\delta$  8.32 – 8.27 (m, 1H), 8.10 – 8.06 (m, 1H), 7.91 – 7.86 (m, 1H), 7.52 (ddd,  $J = 8.2, 4.7, 2.8$  Hz, 3H), 7.27 – 7.08 (m, 6H), 3.90 (s, 3H), 3.24 (s, 3H).  $^{13}\text{C}$  NMR (101 MHz,  $\text{CDCl}_3$ )  $\delta$  181.69, 173.80, 160.29, 145.00, 143.43, 137.49, 134.60, 133.01, 132.91, 132.10, 130.26, 130.06, 125.91, 125.84, 124.03, 122.51, 121.39, 120.96, 120.12, 119.86, 115.60, 113.69, 109.19, 108.05, 55.61, 29.95.

**6-(3-chlorophenyl)-5-methyl-5,6-dihydrobenzo[f]indolo[2,3-b]indole-7,12-dione (3ai)<sup>3</sup>**

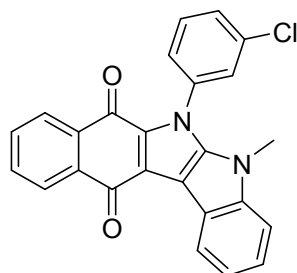

Red solid, 66% yield; mp 275-277 °C.  $^1\text{H}$  NMR (400 MHz,  $\text{DMSO}-d_6$ )  $\delta$  8.48 (d,  $J = 7.7$  Hz, 1H), 8.32 (dd,  $J = 5.7, 3.2$  Hz, 1H), 8.13 (dd,  $J = 5.9, 3.0$  Hz, 1H), 7.95 (s, 1H), 7.91 – 7.79 (m, 5H), 7.58 – 7.53 (m, 1H), 7.48 (dd,  $J = 12.7, 5.0$  Hz, 2H), 3.54 (s,

3H).  $^{13}\text{C}$  NMR (101 MHz,  $\text{DMSO-}d_6$ )  $\delta$  181.57, 173.57, 143.52, 137.47, 134.62, 134.42, 133.26, 132.87, 132.45, 130.52, 130.05, 128.38, 126.60, 125.86, 124.34, 122.19, 121.01, 119.65, 109.99, 109.81, 107.94, 30.35.

**5-methyl-6-(*o*-tolyl)-5,6-dihydrobenzo[f]indolo[2,3-b]indole-7,12-dione (3aj)**<sup>3</sup>

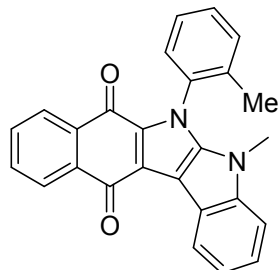

Red solid, 78% yield; mp 271-273 °C.  $^1\text{H}$  NMR (400 MHz,  $\text{CDCl}_3$ )  $\delta$  8.40 (d,  $J = 7.1$  Hz, 1H), 8.23 – 8.17 (m, 1H), 8.03 – 7.96 (m, 1H), 7.64 – 7.59 (m, 2H), 7.53 – 7.41 (m, 4H), 7.38 – 7.30 (m, 2H), 7.24 (t,  $J = 3.7$  Hz, 2H), 3.24 (s, 3H), 2.12 (s, 3H).  $^{13}\text{C}$  NMR (101 MHz,  $\text{CDCl}_3$ )  $\delta$  181.91, 174.16, 151.06, 143.61, 140.32, 136.38, 135.71, 134.60, 133.28, 133.07, 132.33, 131.06, 130.02, 127.94, 127.08, 126.10, 126.03, 124.59, 124.18, 122.70, 121.17, 120.16, 115.44, 109.30, 29.42, 17.40.

**6-(2-methoxyphenyl)-5-methyl-5,6-dihydrobenzo[f]indolo[2,3-b]indole-7,12-dione (3ak)**<sup>3</sup>

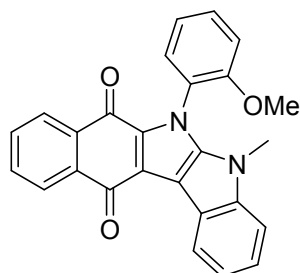

Red solid, 71% yield; mp 246-248 °C.  $^1\text{H}$  NMR (400 MHz,  $\text{CDCl}_3$ )  $\delta$  8.44 (d,  $J = 7.0$  Hz, 1H), 8.26 – 8.22 (m, 1H), 8.08 – 8.03 (m, 1H), 7.67 – 7.61 (m, 4H), 7.41 – 7.19 (m, 6H), 3.82 (s, 3H), 3.37 (s, 3H).  $^{13}\text{C}$  NMR (101 MHz,  $\text{CDCl}_3$ )  $\delta$  181.95, 174.04, 155.65, 145.12, 143.48, 134.79, 134.14, 133.64, 133.45, 133.27, 132.94, 132.14, 131.18, 130.45, 129.74, 129.44, 127.69, 127.02, 126.74, 126.55, 126.47, 125.98, 125.96, 125.23, 123.91, 122.59, 122.12, 121.64, 120.94, 120.84, 120.16, 112.02, 111.97, 110.27, 109.18, 109.12, 108.13, 107.53, 55.88, 29.35.

**6-(2-mercaptophenyl)-5-methyl-5,6-dihydrobenzo[f]indolo[2,3-b]indole-7,12-dione (3al)**<sup>3</sup>

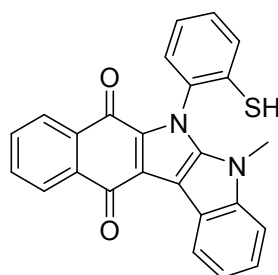

Red solid, 67% yield; mp 281-283 °C. <sup>1</sup>H NMR (400 MHz, CDCl<sub>3</sub>) δ 8.97 – 8.91 (m, 1H), 8.40 – 8.32 (m, 1H), 7.92 (dd, *J* = 8.0, 1.0 Hz, 1H), 7.79 – 7.71 (m, 2H), 7.44 – 7.38 (m, 2H), 7.35 (s, 1H), 7.31 – 7.23 (m, 4H), 7.13 (dd, *J* = 7.7, 1.0 Hz, 1H), 3.91 (s, 3H). <sup>13</sup>C NMR (101 MHz, CDCl<sub>3</sub>) δ 179.29, 145.30, 138.52, 137.16, 135.17, 134.79, 132.73, 132.57, 131.42, 131.10, 130.55, 129.40, 127.38, 126.33, 125.56, 125.51, 124.92, 124.84, 121.85, 121.39, 119.63, 109.92, 107.25, 33.21.

**6-(2-chlorophenyl)-5-methyl-5,6-dihydrobenzo[f]indolo[2,3-b]indole-7,12-dione (3am)<sup>3</sup>**

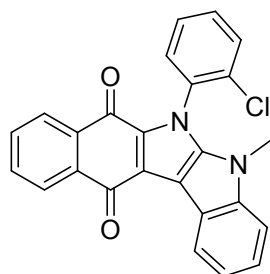

Red solid, 65% yield; mp 263-265 °C. <sup>1</sup>H NMR (400 MHz, CDCl<sub>3</sub>) δ 8.35 (d, *J* = 7.1 Hz, 1H), 8.15 (d, *J* = 6.9 Hz, 1H), 7.95 (d, *J* = 6.9 Hz, 1H), 7.76 (d, *J* = 7.1 Hz, 1H), 7.61 (dd, *J* = 30.5, 7.0 Hz, 5H), 7.29 (dd, *J* = 16.1, 8.1 Hz, 2H), 7.18 (d, *J* = 7.8 Hz, 1H), 3.27 (s, 3H). <sup>13</sup>C NMR (101 MHz, CDCl<sub>3</sub>) δ 181.78, 174.02, 144.53, 143.34, 134.56, 134.41, 134.11, 133.15, 133.05, 132.31, 131.14, 130.33, 130.15, 130.02, 127.87, 126.06, 125.95, 124.12, 122.60, 121.80, 121.14, 120.03, 109.31, 108.16, 29.47.

**6-(2-methoxy-4-methylphenyl)-5-methyl-5,6-dihydrobenzo[f]indolo[2,3-b]indole-7,12-dione (3an)<sup>3</sup>**

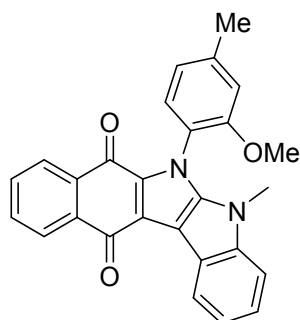

Red solid, 79% yield; mp 271-273 °C. <sup>1</sup>H NMR (400 MHz, CDCl<sub>3</sub>) δ 8.40 – 8.36 (m, 1H), 8.19 – 8.16 (m, 1H), 8.02 – 7.98 (m, 1H), 7.61 – 7.57 (m, 2H), 7.36 – 7.25 (m, 4H), 7.21 (d, *J* = 8.1 Hz, 1H), 7.02 (d, *J* = 9.0 Hz, 1H), 3.72 (s, 3H), 3.30 (s, 3H), 2.40 (s, 3H). <sup>13</sup>C NMR (101 MHz, CDCl<sub>3</sub>) δ 181.94, 173.99, 153.49, 145.16, 143.51, 134.83, 133.30, 132.91, 132.11, 131.56, 130.51, 130.41, 129.74, 125.96, 124.88, 123.87, 122.58, 121.57, 120.90, 120.19, 111.95, 109.17, 108.11, 55.97, 29.37, 20.50.

**6-(3,5-dimethoxyphenyl)-5-methyl-5,6-dihydrobenzo[f]indolo[2,3-b]indole-7,12-dione (3ao)<sup>3</sup>**

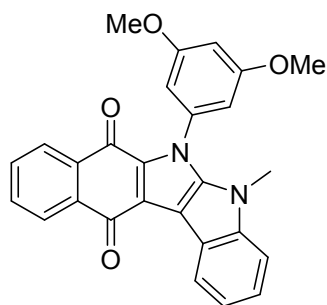

Red solid, 75% yield; mp 256-258 °C.  $^1\text{H}$  NMR (400 MHz,  $\text{CDCl}_3$ )  $\delta$  8.34 (d,  $J = 6.7$  Hz, 1H), 8.16 – 8.10 (m, 1H), 7.99 – 7.90 (m, 1H), 7.56 (dt,  $J = 10.6, 3.6$  Hz, 2H), 7.28 (ddd,  $J = 14.2, 10.2, 3.4$  Hz, 2H), 7.16 (d,  $J = 7.7$  Hz, 1H), 6.75 (d,  $J = 2.2$  Hz, 2H), 6.70 – 6.64 (m, 1H), 3.85 (s, 6H), 3.32 (s, 3H).  $^{13}\text{C}$  NMR (101 MHz,  $\text{CDCl}_3$ )  $\delta$  181.79, 173.75, 161.15, 144.98, 143.48, 138.00, 134.64, 133.07, 132.98, 132.17, 130.28, 125.98, 125.93, 124.10, 122.59, 121.42, 121.03, 119.92, 109.24, 108.05, 106.36, 101.80, 55.66, 29.94.

**6-(3,5-di-tert-butylphenyl)-5-methyl-5,6-dihydrobenzo[f]indolo[2,3-b]indole-7,12-dione (3ap)<sup>3</sup>**

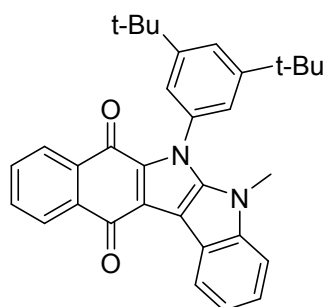

Red solid, 82% yield; mp 286-288 °C.  $^1\text{H}$  NMR (400 MHz,  $\text{CDCl}_3$ )  $\delta$  8.39 – 8.36 (m, 1H), 8.17 – 8.14 (m, 1H), 7.96 (dd,  $J = 5.3, 1.9$  Hz, 1H), 7.62 (t,  $J = 1.7$  Hz, 1H), 7.58 – 7.55 (m, 2H), 7.42 (d,  $J = 1.7$  Hz, 2H), 7.32 – 7.24 (m, 3H), 7.14 (s, 1H), 3.18 (s, 3H), 1.40 (s, 18H).  $^{13}\text{C}$  NMR (101 MHz,  $\text{CDCl}_3$ )  $\delta$  181.88, 173.79, 152.13, 152.06, 145.16, 143.49, 135.76, 134.83, 133.17, 132.88, 132.05, 130.34, 126.06, 125.85, 123.93, 123.08, 122.57, 122.26, 121.25, 120.89, 120.01, 115.95, 109.13, 107.98, 35.11, 34.91, 31.42, 31.36, 29.82.

**5-methyl-6-(naphthalen-1-yl)-5,6-dihydrobenzo[f]indolo[2,3-b]indole-7,12-dione (3aq)<sup>3</sup>**

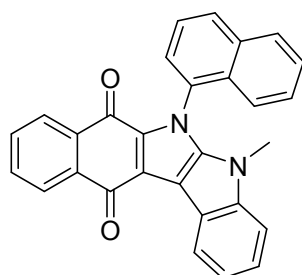

Red solid, 89% yield; mp 267-269 °C. <sup>1</sup>H NMR (400 MHz, CDCl<sub>3</sub>) δ 8.44 (dd, *J* = 6.2, 2.4 Hz, 1H), 8.20 (dd, *J* = 7.5, 1.1 Hz, 1H), 8.12 (d, *J* = 8.3 Hz, 1H), 8.01 (d, *J* = 8.3 Hz, 1H), 7.89 (dd, *J* = 7.5, 1.1 Hz, 1H), 7.81 (d, *J* = 7.3 Hz, 1H), 7.68 (d, *J* = 8.0 Hz, 1H), 7.62 – 7.54 (m, 3H), 7.43 (d, *J* = 8.3 Hz, 1H), 7.34 – 7.29 (m, 3H), 7.16 (dd, *J* = 6.5, 2.1 Hz, 1H), 2.99 (s, 3H). <sup>13</sup>C NMR (101 MHz, CDCl<sub>3</sub>) δ 181.74, 173.91, 143.48, 134.56, 134.06, 133.24, 133.12, 133.05, 132.30, 130.94, 130.26, 128.59, 128.04, 127.11, 126.09, 126.04, 125.87, 125.28, 124.18, 122.71, 121.98, 121.14, 120.09, 109.31, 108.09, 29.42.

**5-methyl-6-(pyren-1-yl)-5,6-dihydrobenzo[f]indolo[2,3-b]indole-7,12-dione (3ar)<sup>3</sup>**

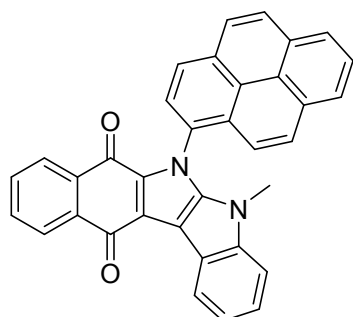

Red solid, 78% yield; mp 281-283 °C. <sup>1</sup>H NMR (400 MHz, CDCl<sub>3</sub>) δ 8.50 (dd, *J* = 6.2, 2.9 Hz, 1H), 8.38 (d, *J* = 8.1 Hz, 1H), 8.30 (d, *J* = 7.6 Hz, 1H), 8.28 – 8.13 (m, 6H), 8.10 – 8.03 (m, 2H), 7.87 (d, *J* = 6.5 Hz, 1H), 7.64 – 7.55 (m, 3H), 7.37 – 7.34 (m, 2H), 7.20 – 7.17 (m, 1H), 2.92 (s, 3H). <sup>13</sup>C NMR (101 MHz, CDCl<sub>3</sub>) δ 182.04, 174.08, 146.05, 143.56, 137.45, 134.60, 133.32, 133.09, 132.36, 131.58, 131.13, 130.84, 130.00, 129.74, 128.87, 128.65, 127.20, 126.71, 126.35, 126.15, 126.05, 125.63, 125.05, 124.92, 124.43, 124.24, 122.81, 121.86, 121.22, 120.87, 120.17, 111.39, 109.38, 108.17, 29.50.

**6-(3-chloropyridin-4-yl)-5-methyl-5,6-dihydrobenzo[f]indolo[2,3-b]indole-7,12-dione (3as)<sup>3</sup>**

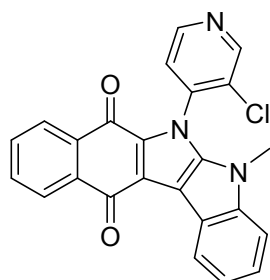

Red solid, 63% yield; mp 283-285 °C. <sup>1</sup>H NMR (400 MHz, CDCl<sub>3</sub>) δ 9.51 (d, *J* = 5.0 Hz, 1H), 9.00 (d, *J* = 7.1 Hz, 1H), 8.83 – 8.77 (m, 1H), 8.55 (dd, *J* = 7.3, 1.5 Hz, 1H), 8.48 (d, *J* = 5.0 Hz, 1H), 8.29 – 8.23 (m, 2H), 8.08 – 7.86 (m, 3H), 7.83 (d, *J* = 7.8 Hz, 1H), 3.95 (s, 3H). <sup>13</sup>C NMR (101 MHz, CDCl<sub>3</sub>) δ 181.56, 173.96, 150.93, 149.29, 143.84, 143.17, 142.38, 134.01, 133.24, 132.95, 132.54, 130.67, 129.83, 126.18, 125.92, 124.47, 124.43, 122.59, 122.28, 121.43, 119.78, 109.44, 108.55, 29.65.

**5-methyl-6-phenyl-5,6-dihydrobenzo[f]indolo[2,3-b]indole-7,12-dione (3aa)<sup>3</sup>**

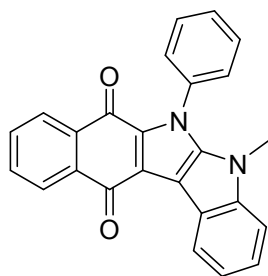

Red solid, 87% yield; mp 263-265 °C. <sup>1</sup>H NMR (400 MHz, CDCl<sub>3</sub>) δ 8.35 (d, *J* = 7.3 Hz, 1H), 8.14 (d, *J* = 5.9 Hz, 1H), 7.94 (d, *J* = 5.5 Hz, 1H), 7.60 (d, *J* = 15.9 Hz, 7H), 7.36 – 7.23 (m, 3H), 7.17 (d, *J* = 7.6 Hz, 1H), 3.24 (s, 3H). <sup>13</sup>C NMR (101 MHz, CDCl<sub>3</sub>) δ 181.88, 174.08, 143.50, 136.44, 134.64, 133.08, 132.28, 129.81, 129.49, 127.94, 125.99, 124.18, 122.63, 121.09, 119.90, 109.28, 30.09.

### 5-benzyl-6-phenyl-5,6-dihydrobenzo[f]indolo[2,3-b]indole-7,12-dione (3ba)<sup>3</sup>

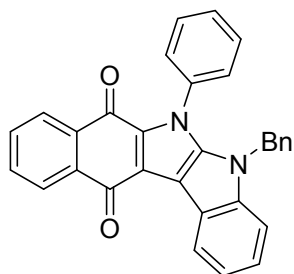

Red solid, 85% yield; mp 279-281 °C. <sup>1</sup>H NMR (400 MHz, CDCl<sub>3</sub>) δ 8.46 (s, 1H), 8.20 (d, *J* = 6.6 Hz, 1H), 7.97 (d, *J* = 7.0 Hz, 1H), 7.62 (d, *J* = 6.0 Hz, 2H), 7.50 (d, *J* = 7.1 Hz, 1H), 7.32 (ddd, *J* = 26.6, 15.2, 7.5 Hz, 7H), 7.18 (dd, *J* = 26.6, 7.1 Hz, 4H), 6.62 (d, *J* = 6.8 Hz, 2H), 4.95 (s, 2H). <sup>13</sup>C NMR (101 MHz, CDCl<sub>3</sub>) δ 181.94, 174.20, 144.55, 143.43, 136.06, 134.63, 133.15, 132.40, 130.59, 129.61, 129.18, 128.61, 127.61, 126.08, 125.50, 124.49, 122.86, 121.52, 120.13, 109.87, 108.70, 77.32, 77.01, 76.69, 46.74.

### 1,5-dimethyl-6-phenyl-5,6-dihydrobenzo[f]indolo[2,3-b]indole-7,12-dione (3da)<sup>3</sup>

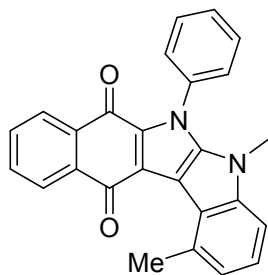

Red solid, 76% yield; mp 278-280 °C. <sup>1</sup>H NMR (400 MHz, CDCl<sub>3</sub>) δ 8.12 – 8.08 (m, 1H), 7.89 (dd, *J* = 7.3, 1.6 Hz, 1H), 7.62 – 7.50 (m, 7H), 7.19 (t, *J* = 7.7 Hz, 1H), 7.04 – 6.97 (m, 2H), 3.16 (s, 6H). <sup>13</sup>C NMR (101 MHz, CDCl<sub>3</sub>) δ 181.25, 174.55, 145.20, 143.72, 136.87, 134.06, 133.81, 133.64, 132.63, 132.38, 131.40, 129.75, 129.48, 129.06, 128.07, 126.35, 125.36, 124.09, 123.11, 121.20, 120.13, 106.65, 106.39, 30.04, 22.44.

**2-methoxy-5-methyl-6-phenyl-5,6-dihydrobenzo[f]indolo[2,3-b]indole-7,12-dione (3ea)<sup>3</sup>**

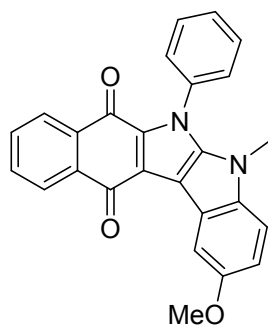

Red solid, 73% yield; mp 271-273 °C. <sup>1</sup>H NMR (400 MHz, CDCl<sub>3</sub>) δ 8.36 – 8.32 (m, 1H), 8.17 – 8.13 (m, 1H), 8.07 (d, *J* = 2.3 Hz, 1H), 7.86 (s, 5H), 7.81 – 7.78 (m, 2H), 7.23 (d, *J* = 8.8 Hz, 1H), 7.13 (dd, *J* = 8.8, 2.5 Hz, 1H), 4.18 (s, 3H), 3.42 (s, 3H). <sup>13</sup>C NMR (101 MHz, CDCl<sub>3</sub>) δ 181.85, 173.90, 154.87, 145.49, 138.24, 136.46, 134.65, 133.00, 132.12, 130.20, 129.70, 129.38, 127.98, 125.96, 125.75, 121.42, 120.34, 113.43, 109.97, 108.20, 105.02, 55.93, 30.06.

**2-chloro-5-methyl-6-phenyl-5,6-dihydrobenzo[f]indolo[2,3-b]indole-7,12-dione (3fa)<sup>3</sup>**

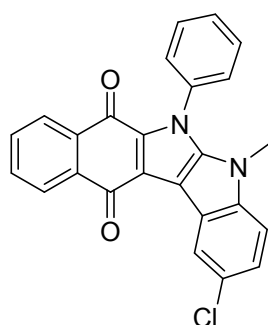

Red solid, 64% yield; mp 266-268 °C. <sup>1</sup>H NMR (400 MHz, CDCl<sub>3</sub>) δ 8.29 – 8.27 (m, 1H), 8.13 (dd, *J* = 4.0, 3.2 Hz, 1H), 7.92 (t, *J* = 3.4 Hz, 1H), 7.63 (s, 7H), 7.24 (d, *J* = 1.8 Hz, 2H), 7.08 (s, 1H), 3.25 (s, 3H). <sup>13</sup>C NMR (101 MHz, CDCl<sub>3</sub>) δ 181.22, 174.30, 141.68, 136.21, 134.43, 134.12, 133.12, 132.98, 132.47, 129.91, 129.52, 127.93, 126.55, 126.06, 126.03, 123.98, 122.02, 120.92, 110.18, 30.23.

**2-bromo-5-methyl-6-phenyl-5,6-dihydrobenzo[f]indolo[2,3-b]indole-7,12-dione (3ga)<sup>3</sup>**

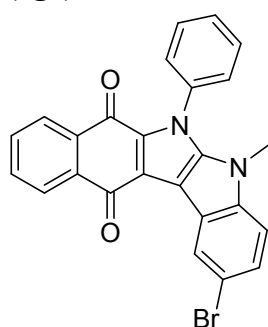



Red solid, 62% yield; mp 276-278 °C. <sup>1</sup>H NMR (400 MHz, CDCl<sub>3</sub>) δ 8.45 (s, 1H), 8.14 (d, *J* = 7.4 Hz, 1H), 7.94 (d, *J* = 7.3 Hz, 1H), 7.60 (d, *J* = 7.8 Hz, 7H), 7.38 (d, *J* = 8.7 Hz, 1H), 7.05 (d, *J* = 8.7 Hz, 1H), 3.27 (s, 3H). <sup>13</sup>C NMR (101 MHz, CDCl<sub>3</sub>) δ 181.42, 174.37, 142.02, 136.19, 134.42, 133.11, 132.96, 132.47, 129.91, 129.51, 127.94, 126.63, 126.06, 126.02, 124.94, 121.44, 113.97, 110.64, 30.24.

**3-fluoro-5-methyl-6-phenyl-5,6-dihydrobenzo[f]indolo[2,3-b]indole-7,12-dione (3ha)<sup>3</sup>**

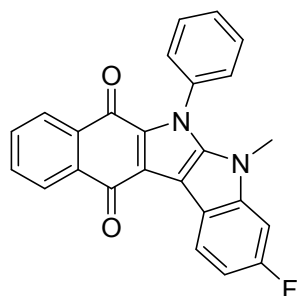

Red solid, 60% yield; mp 281-283 °C. <sup>1</sup>H NMR (400 MHz, CDCl<sub>3</sub>) δ 8.28 (dd, *J* = 8.6, 5.6 Hz, 1H), 8.17 – 8.13 (m, 1H), 7.99 – 7.94 (m, 1H), 7.64 – 7.58 (m, 7H), 7.04 – 6.99 (m, 1H), 6.90 (dd, *J* = 9.6, 2.2 Hz, 1H), 3.23 (s, 3H). <sup>13</sup>C NMR (101 MHz, CDCl<sub>3</sub>) δ 181.81, 174.18, 161.96, 159.39, 145.07, 143.29, 136.27, 134.64, 133.13, 133.08, 132.35, 129.89, 129.52, 127.88, 126.07, 126.01, 123.56, 123.46, 109.08, 108.85, 97.03, 96.75, 30.31. <sup>19</sup>F NMR (376 MHz, CDCl<sub>3</sub>) δ 115.95.

**4,5-dimethyl-6-phenyl-5,6-dihydrobenzo[f]indolo[2,3-b]indole-7,12-dione (3ia)<sup>3</sup>**

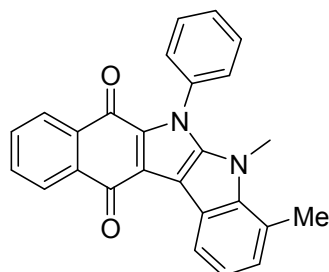

Red solid, 79% yield; mp 276-278 °C. <sup>1</sup>H NMR (400 MHz, CDCl<sub>3</sub>) δ 8.29 (d, *J* = 7.6 Hz, 1H), 8.19 – 8.16 (m, 1H), 8.00 – 7.97 (m, 1H), 7.60 (t, *J* = 2.9 Hz, 7H), 7.17 (s, 1H), 7.04 (d, *J* = 7.4 Hz, 1H), 3.50 (s, 3H), 2.67 (s, 3H). <sup>13</sup>C NMR (101 MHz, CDCl<sub>3</sub>) δ 181.46, 173.71, 145.96, 142.52, 136.72, 136.32, 134.73, 133.16, 133.06, 132.27, 129.70, 129.47, 127.95, 126.03, 121.57, 121.47, 121.42, 121.03, 120.98, 120.68, 33.59, 19.87.

**5-methyl-6-phenyl-5,6-dihydroindolo[2,3-b]naphtho[2,3-f]indole-7,14-dione (3ja)<sup>3</sup>**

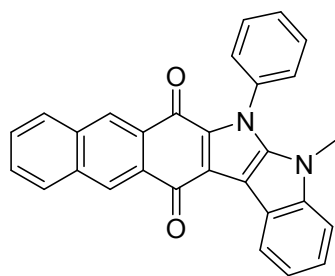

Red solid, 83% yield; mp 285-287 °C.  $^1\text{H}$  NMR (400 MHz,  $\text{CDCl}_3$ )  $\delta$  8.68 (s, 1H), 8.47 (s, 1H), 8.02 (d,  $J = 7.3$  Hz, 1H), 7.89 (d,  $J = 7.1$  Hz, 1H), 7.65 – 7.55 (m, 7H), 7.37 – 7.31 (m, 2H), 7.25 – 7.19 (m, 2H), 3.28 (s, 3H).  $^{13}\text{C}$  NMR (101 MHz,  $\text{CDCl}_3$ )  $\delta$  181.45, 173.91, 143.53, 142.95, 134.89, 134.40, 134.32, 131.54, 130.88, 130.35, 129.97, 129.79, 129.75, 129.43, 128.73, 128.58, 128.03, 128.00, 127.92, 127.09, 124.16, 123.97, 122.81, 121.50, 121.19, 109.99, 109.26, 104.96, 30.09.

## 7. References

1. L. Zhang, C. Peng, D. Zhao, Y. Wang, H.-J. Fu, Q. Shen and J.-X. Li, Cu (ii)-catalyzed C–H (SP<sup>3</sup>) oxidation and C–N cleavage: base-switched methylenation and formylation using tetramethylethylenediamine as a carbon source. *Chem. Commun.*, 2012, **48**, 5928-5930.
2. Y. Dong, H. Zhang, J. Yang, S. He, Z.-C. Shi, X.-M. Zhang and J.-Y. Wang, B (C<sub>6</sub>F<sub>5</sub>)<sub>3</sub>-Catalyzed C–C Coupling of 1, 4-Naphthoquinones with the C-3 Position of Indole Derivatives in Water. *ACS omega*, 2019, **4**, 21567-21577.
3. Y. Dong, J. Yang, H. Zhang, X.-Y. Zhan, Z.-C. Shi, S. He, X.-M. Zhang and J.-Y. Wang, Cobalt-Catalyzed Cycloamination: Synthesis and Photophysical Properties of Polycyclic N-Heterocycles, *Org. Lett.*, 2020, **22**, 5151-5156.

## 8. Copies of $^1\text{H}$ , $^{13}\text{C}$ and $^{19}\text{F}$ NMR spectra for all Compounds

## 2-(1-methyl-1H-indol-3-yl)-3-(phenylamino)naphthalene-1,4-dione (4a)

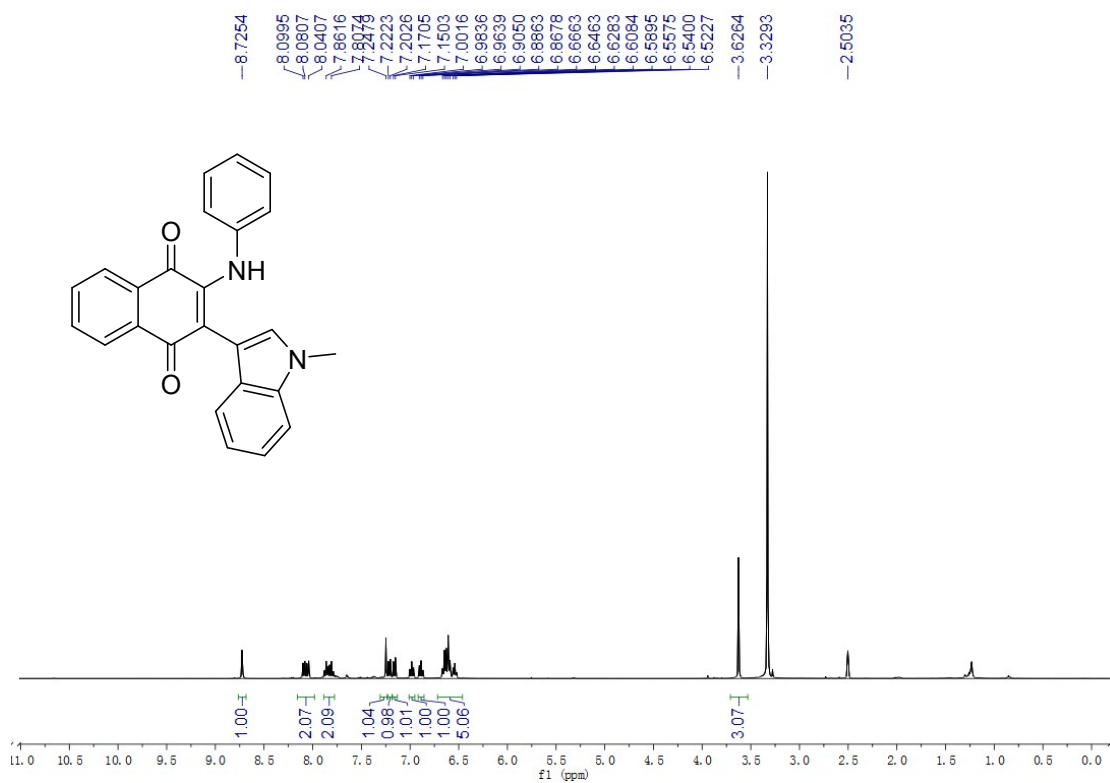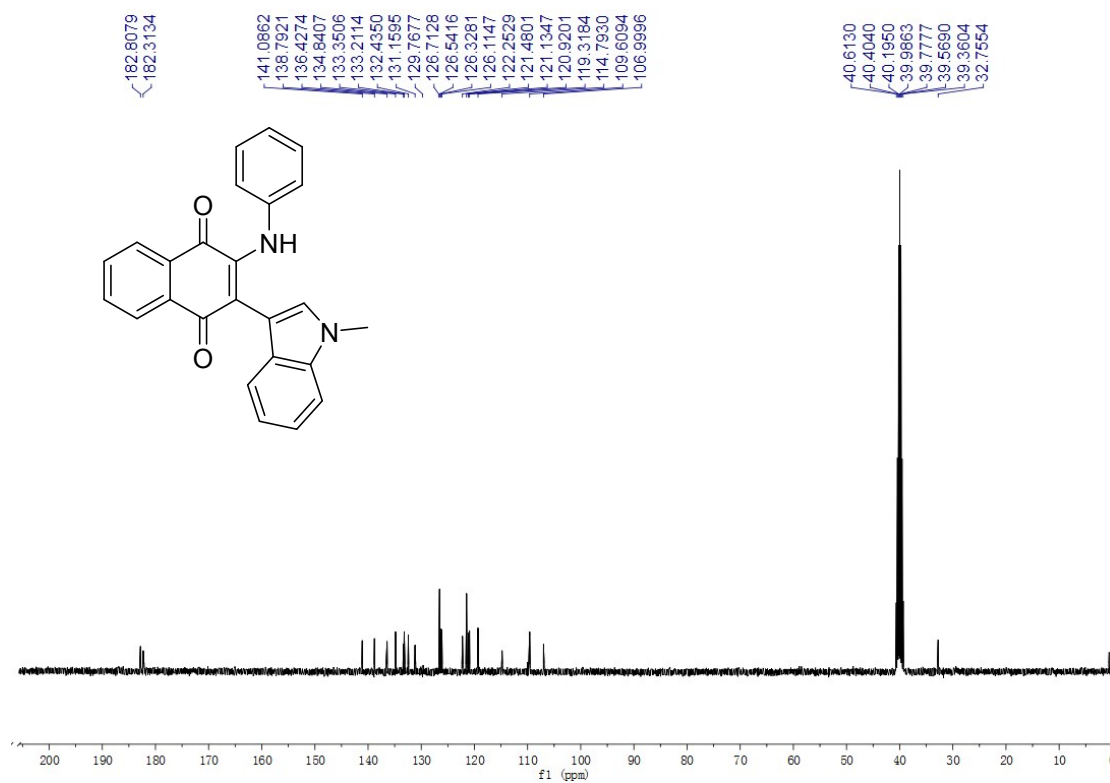

# 5-methyl-6-(p-tolyl)-5,6-dihydrobenzo[f]indolo[2,3-b]indole-7,12-dione (3ab)

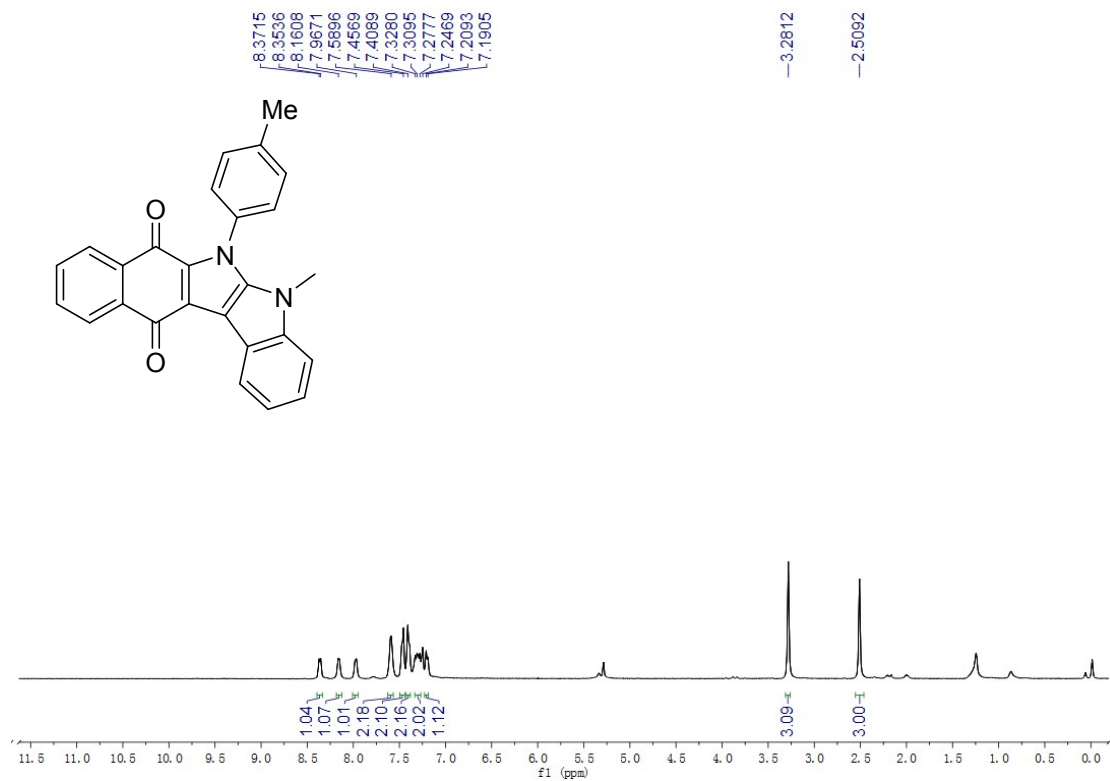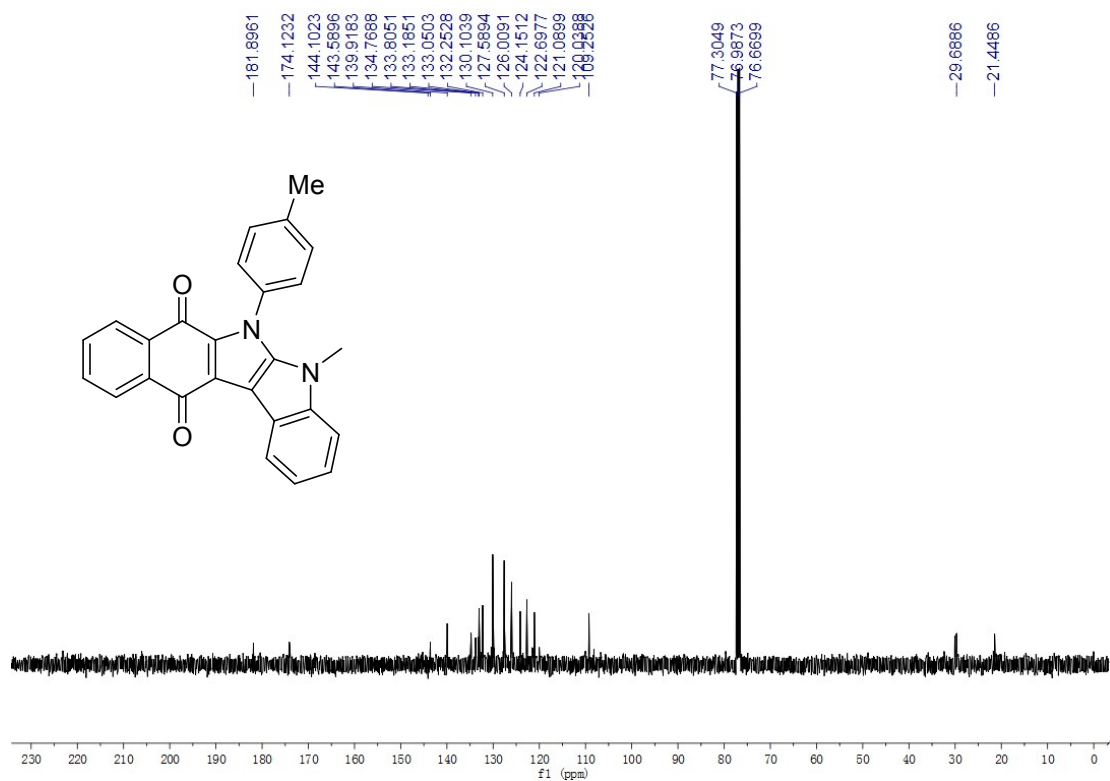

**6-(4-methoxyphenyl)-5-methyl-5,6-dihydrobenzo[f]indolo[2,3-b]indole-7,12-dione (3ac)**

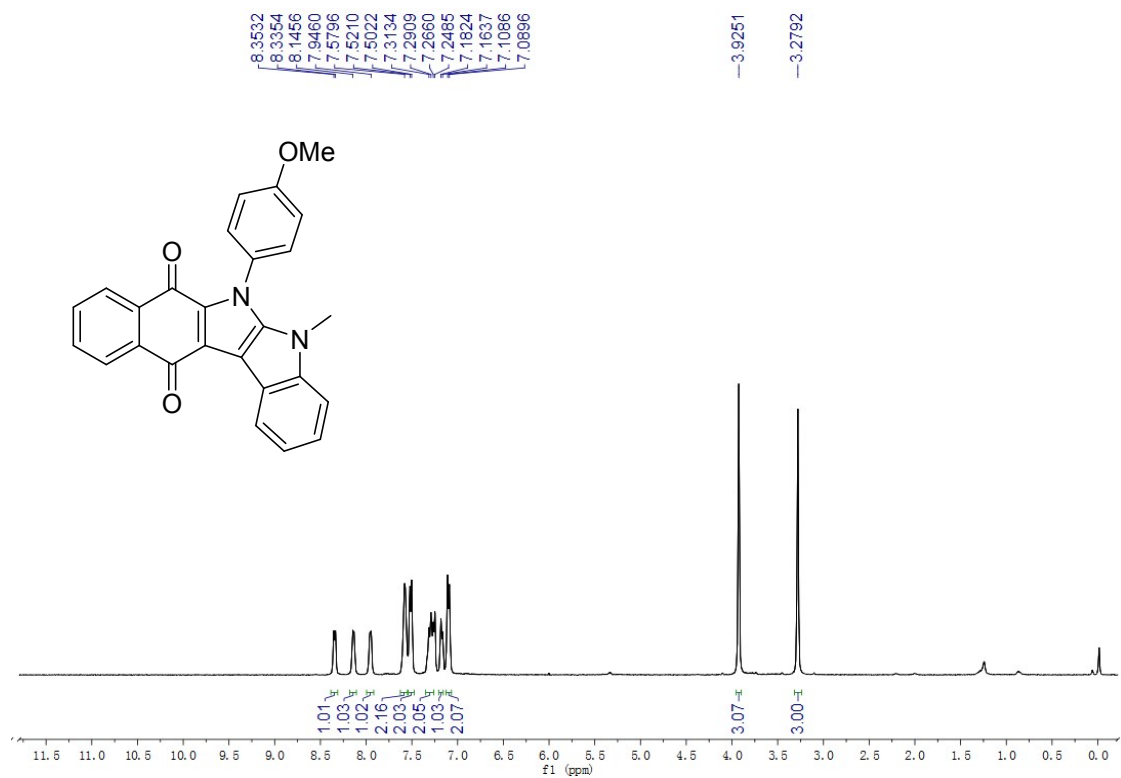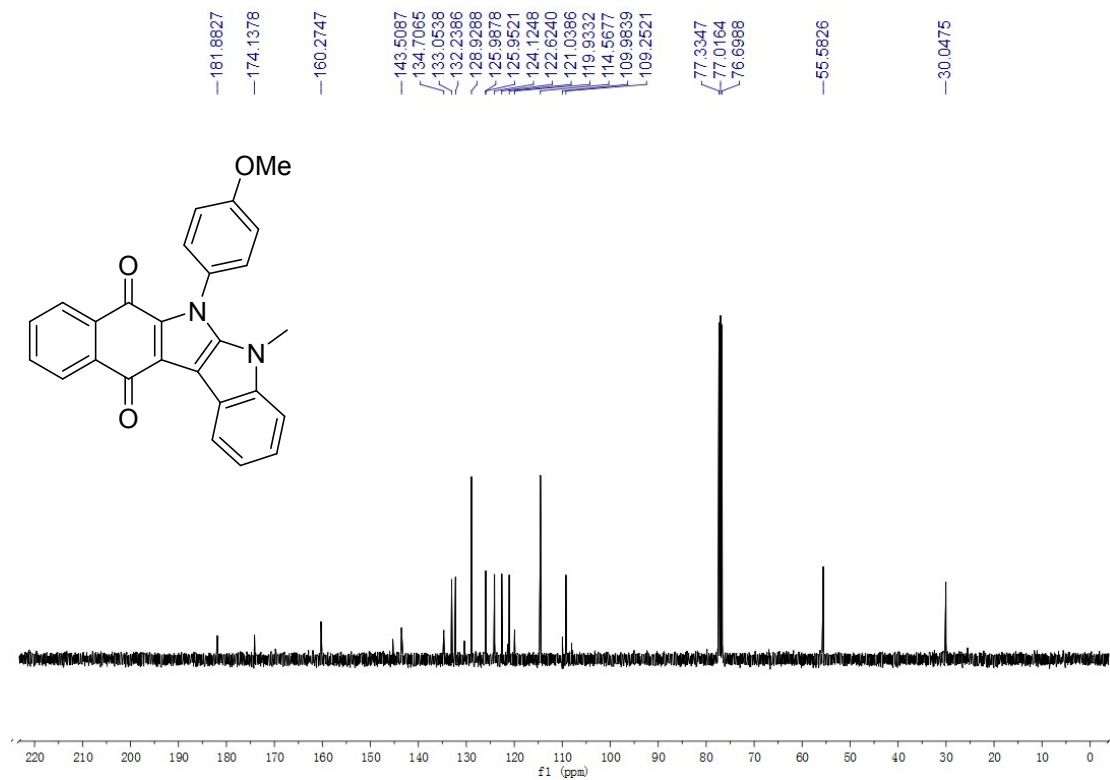

**6-(4-aminophenyl)-5-methyl-5,6-dihydrobenzo[f]indolo[2,3-b]indole-7,12-dione  
(3ad)**

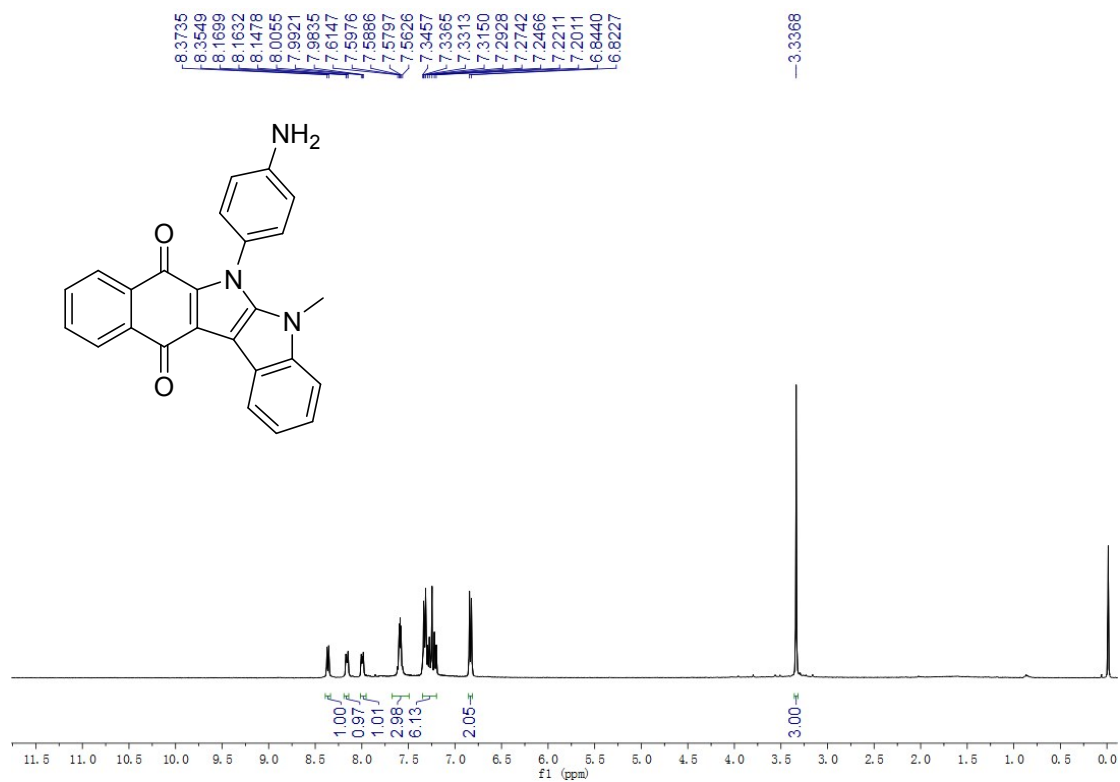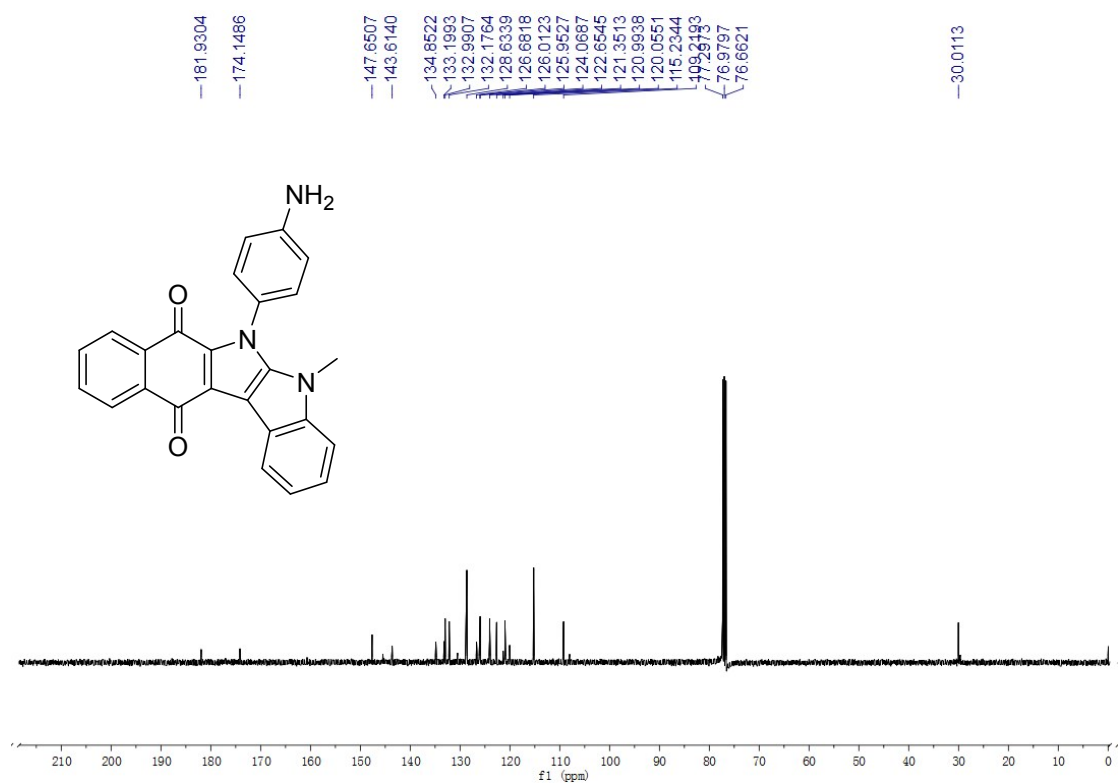

**6-(4-fluorophenyl)-5-methyl-5,6-dihydrobenzo[f]indolo[2,3-b]indole-7,12-dione  
(3ae)**

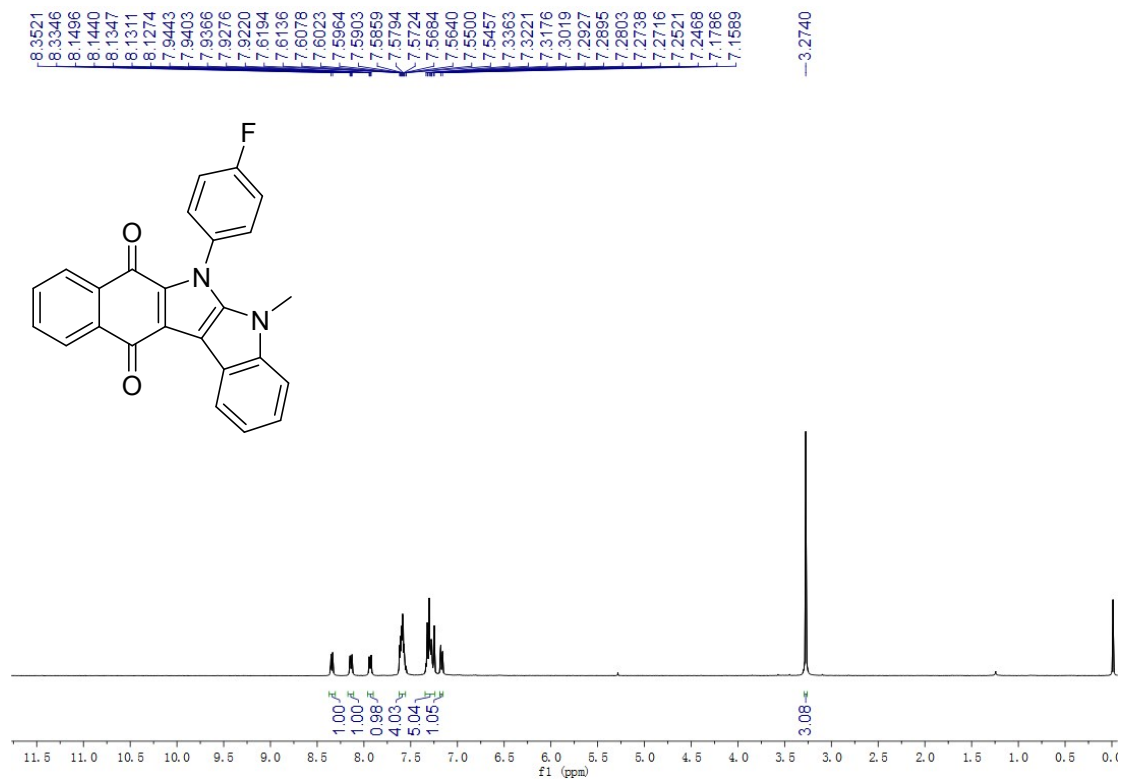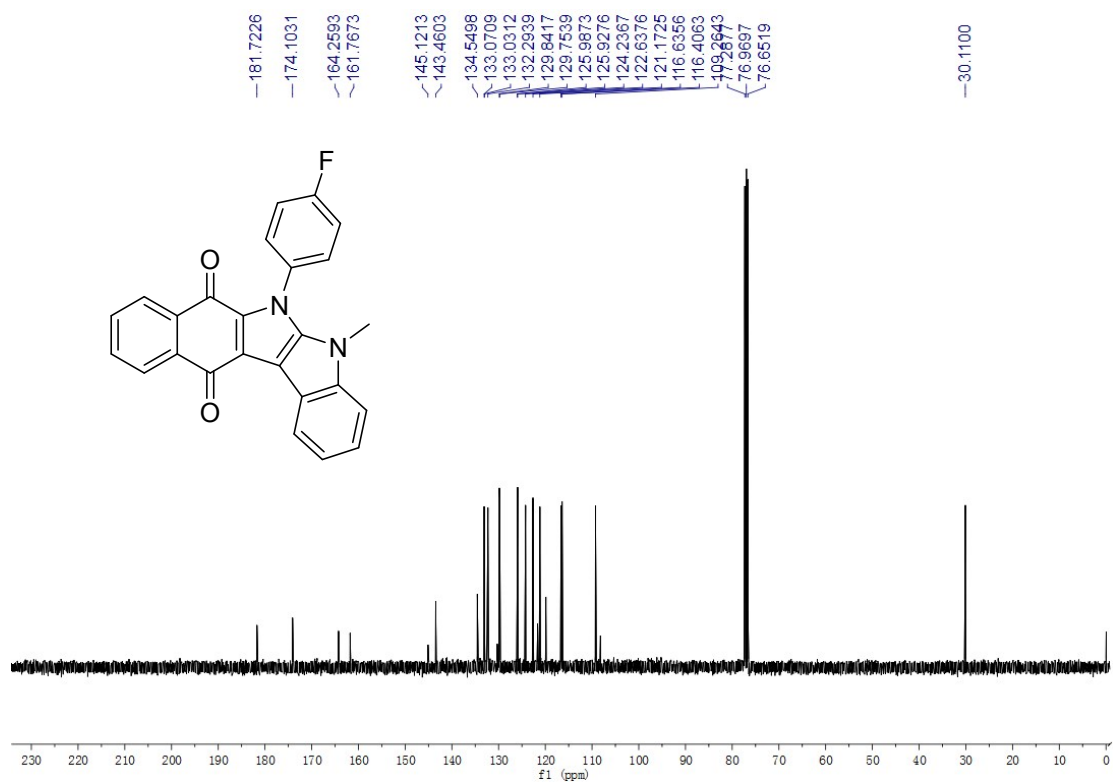





**6-(4-chlorophenyl)-5-methyl-5,6-dihydrobenzo[f]indolo[2,3-b]indole-7,12-dione  
(3af)**

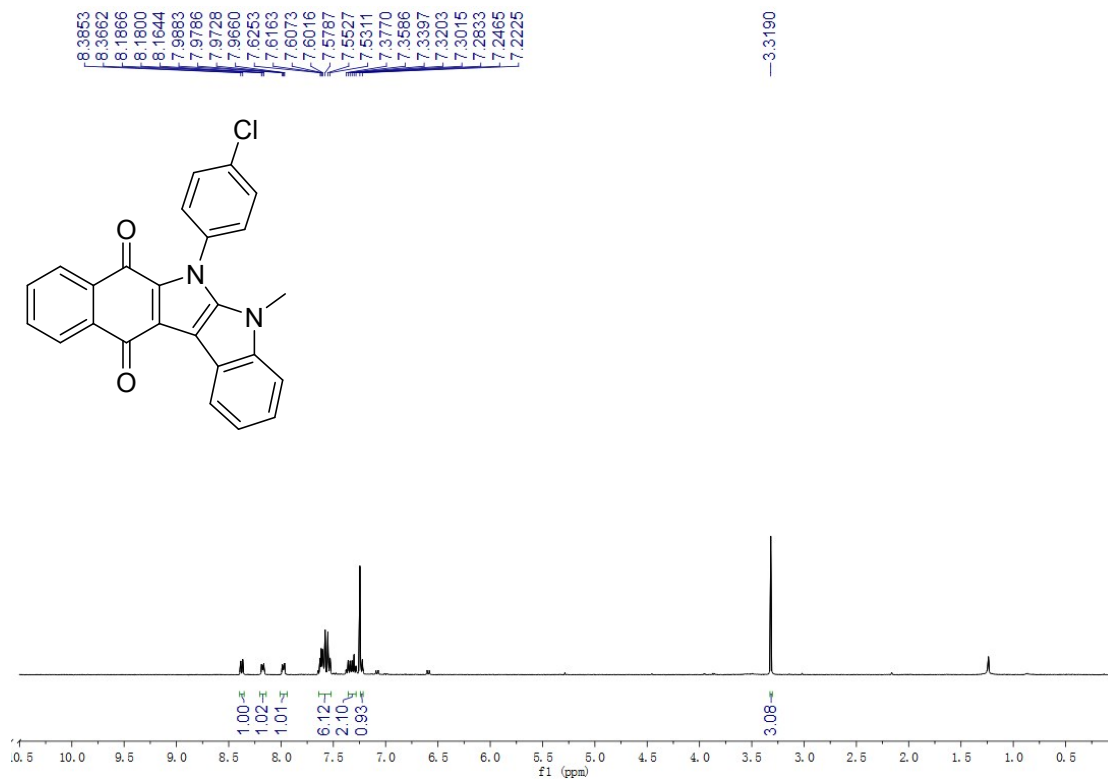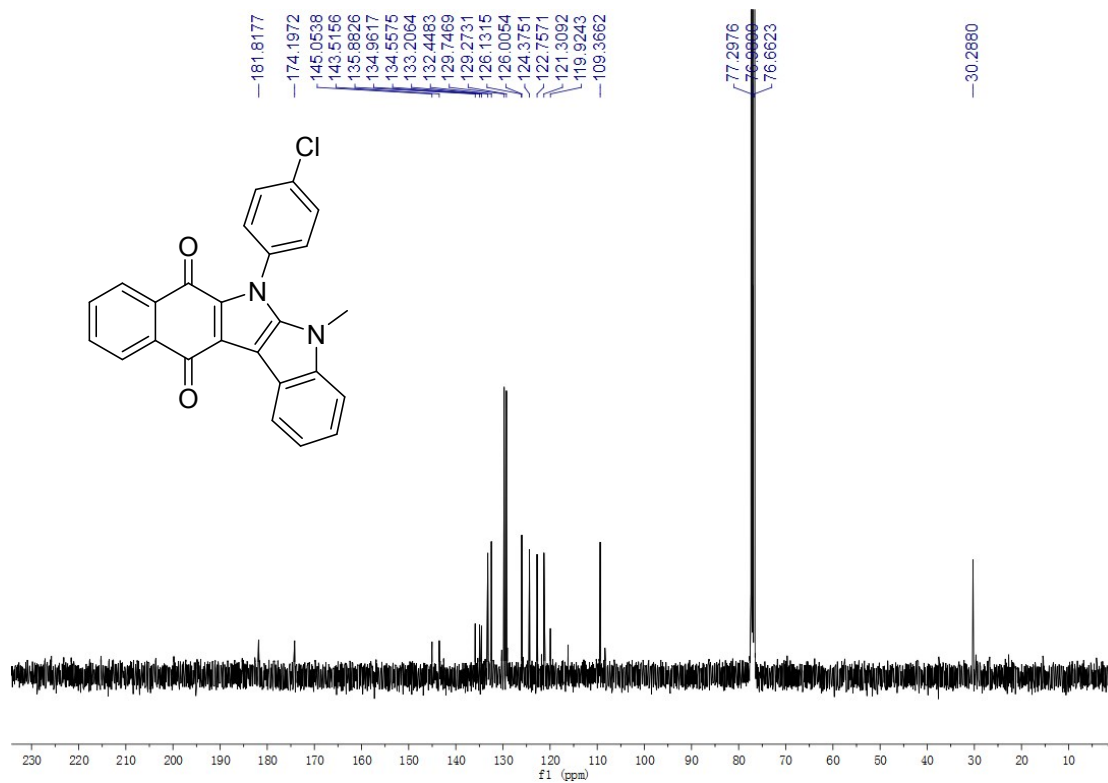

**6-(4-bromophenyl)-5-methyl-5,6-dihydrobenzo[f]indolo[2,3-b]indole-7,12-dione  
(3ag)**

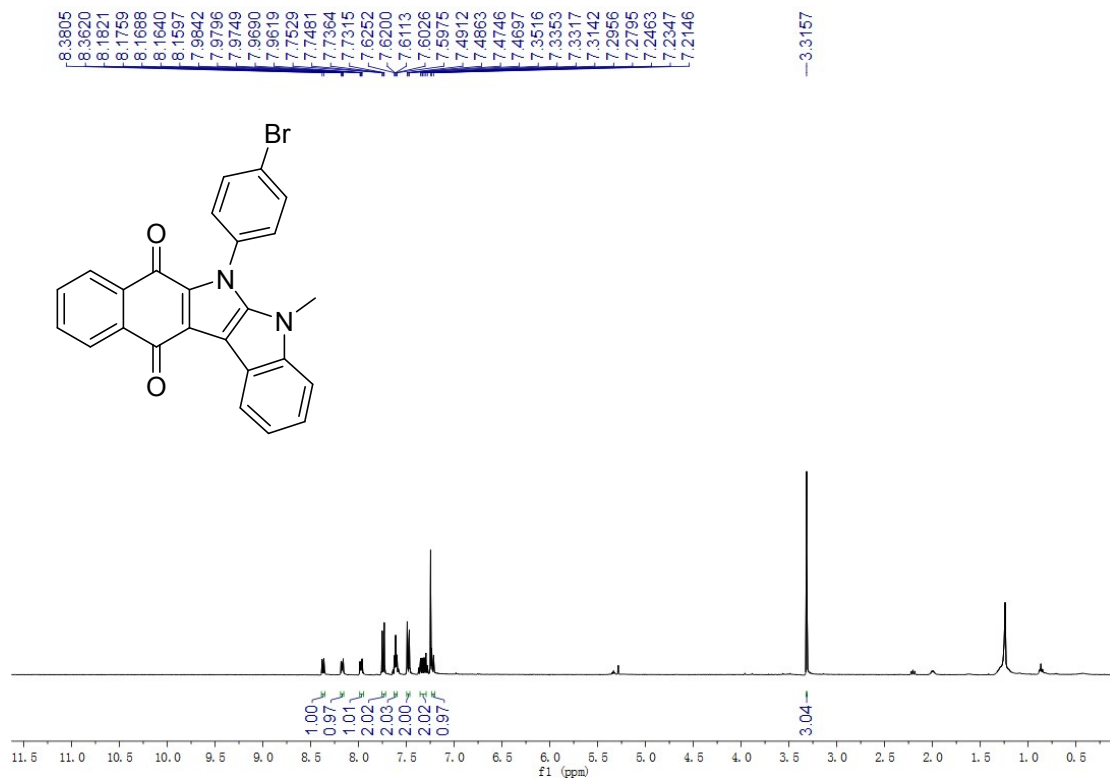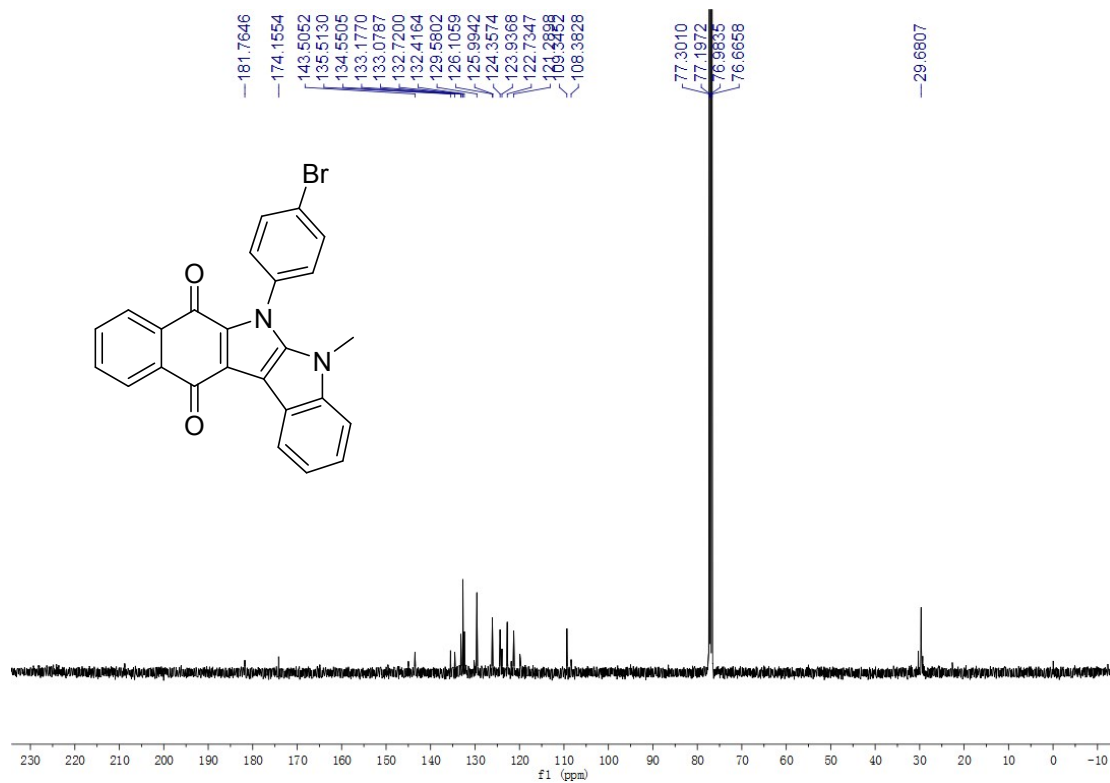

**6-(3-methoxyphenyl)-5-methyl-5,6-dihydrobenzo[f]indolo[2,3-b]indole-7,12-dione (3ah)**

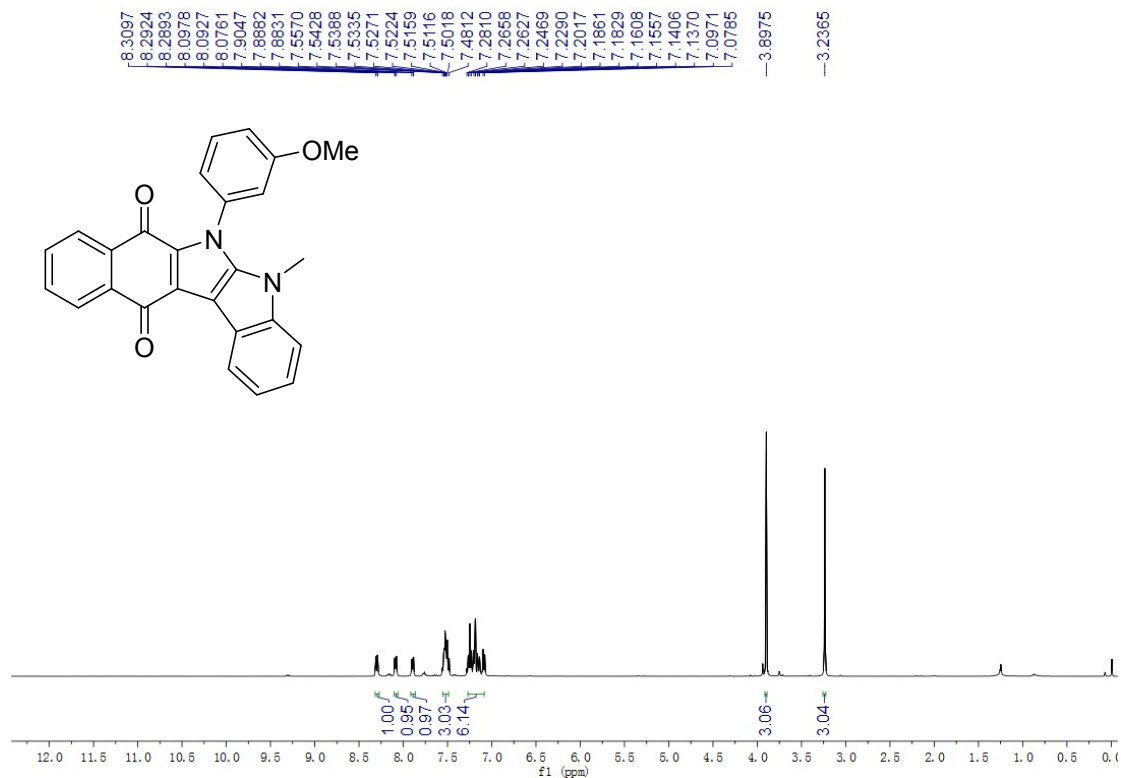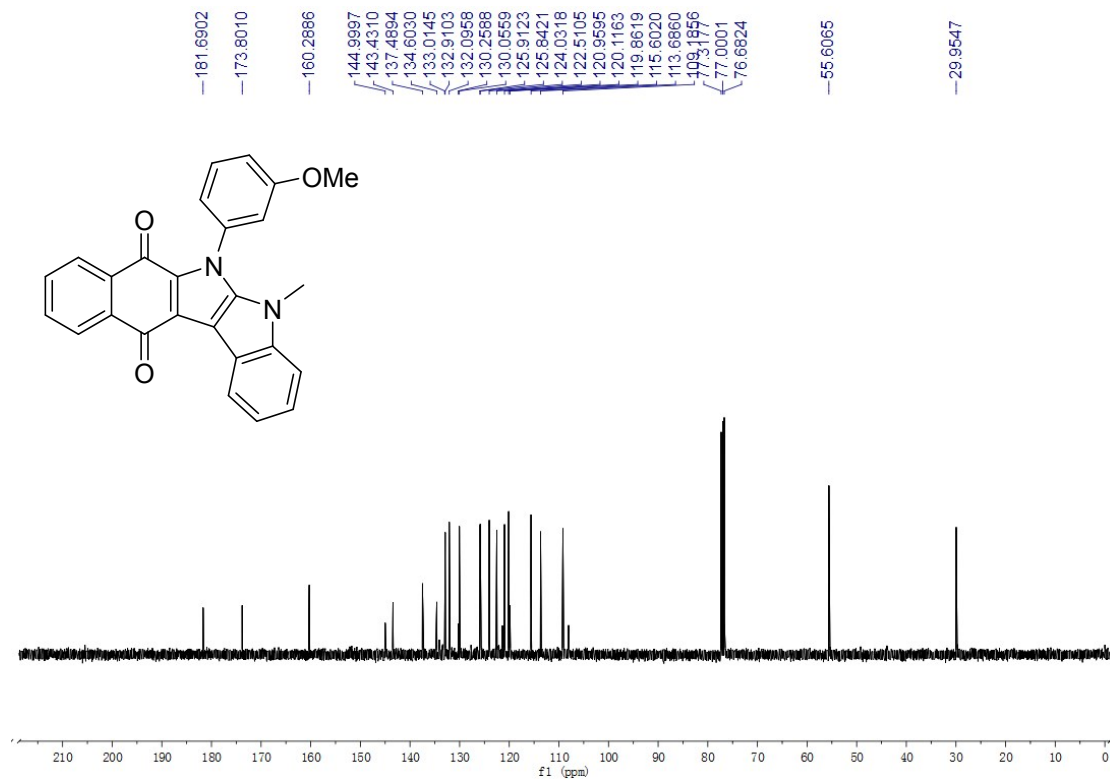

**6-(3-chlorophenyl)-5-methyl-5,6-dihydrobenzo[f]indolo[2,3-b]indole-7,12-dione  
(3ai)**

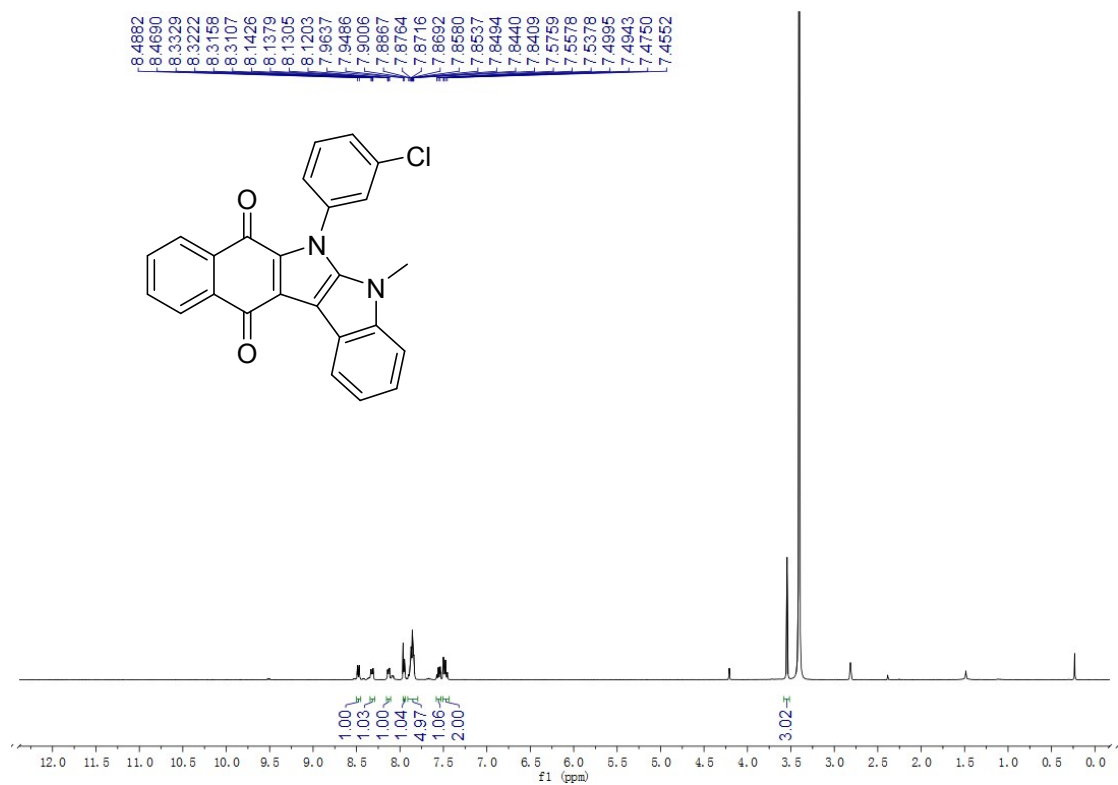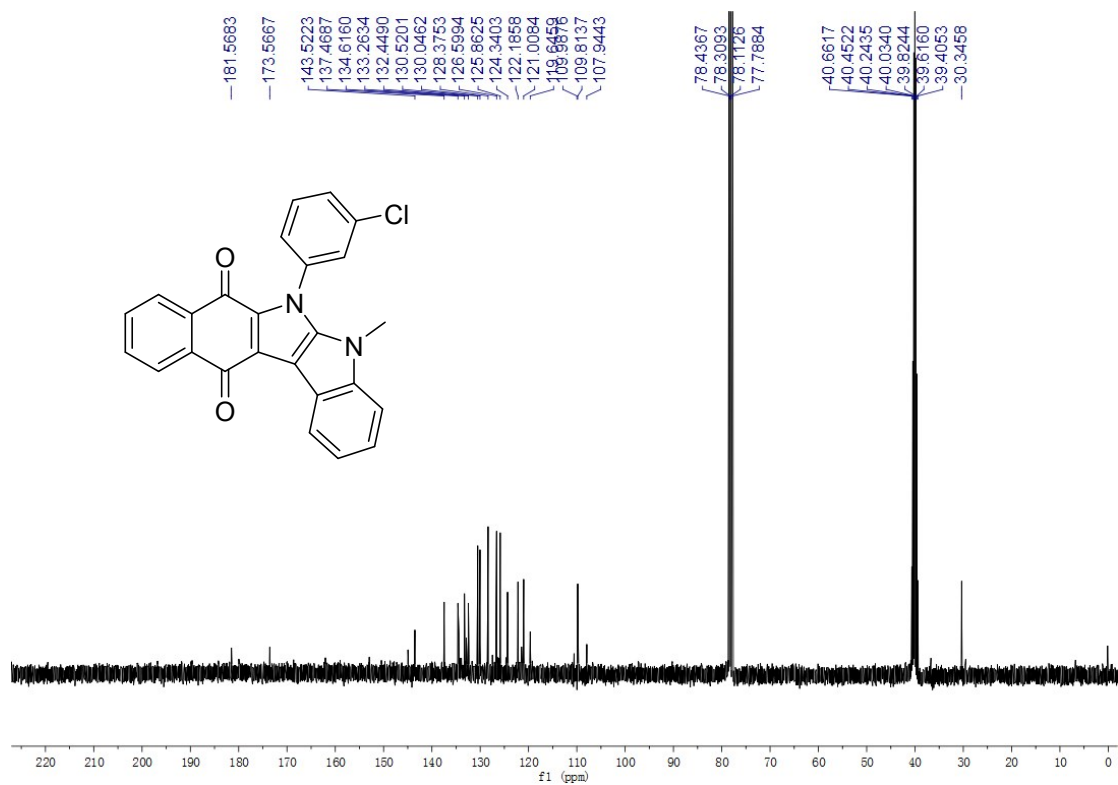

**5-methyl-6-(o-tolyl)-5,6-dihydrobenzo[f]indolo[2,3-b]indole-7,12-dione (3aj)**

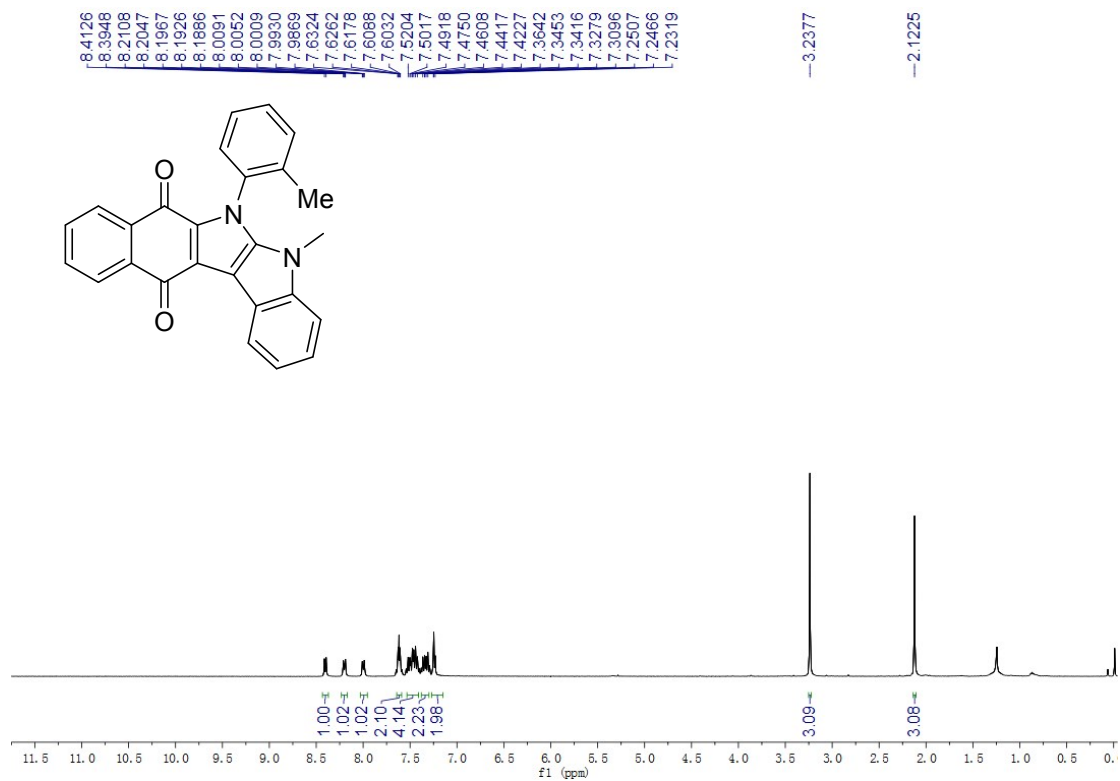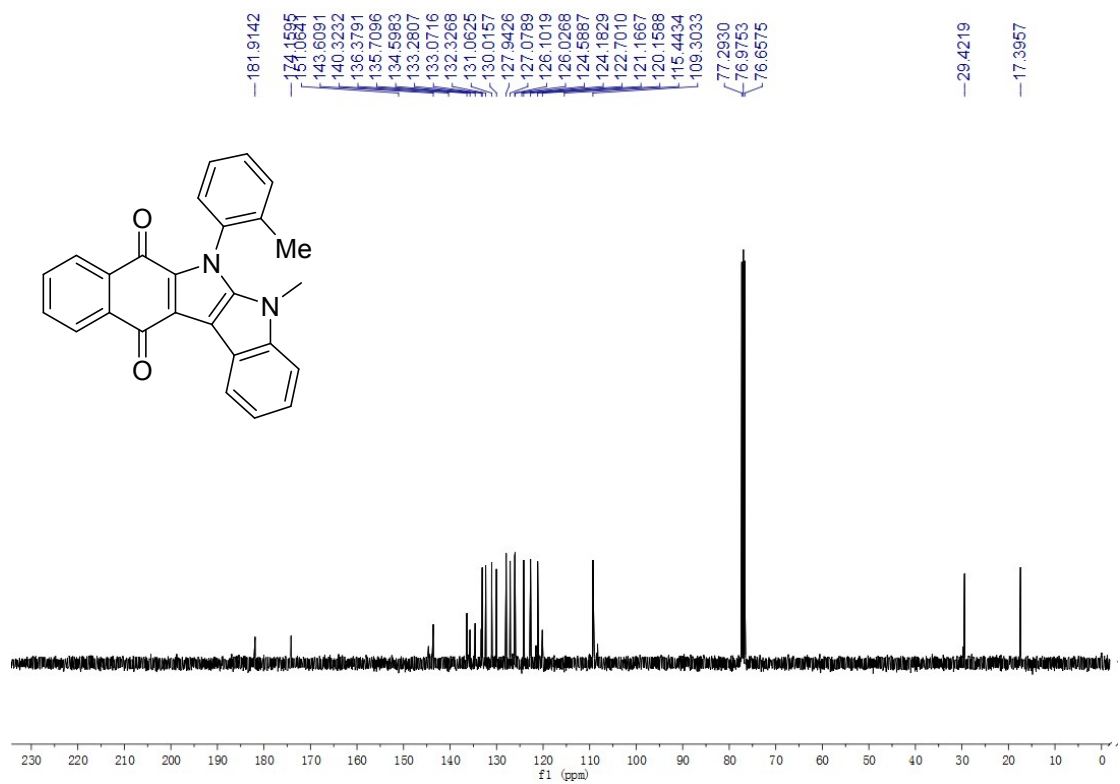

**6-(2-methoxyphenyl)-5-methyl-5,6-dihydrobenzo[f]indolo[2,3-b]indole-7,12-dione (3ak)**

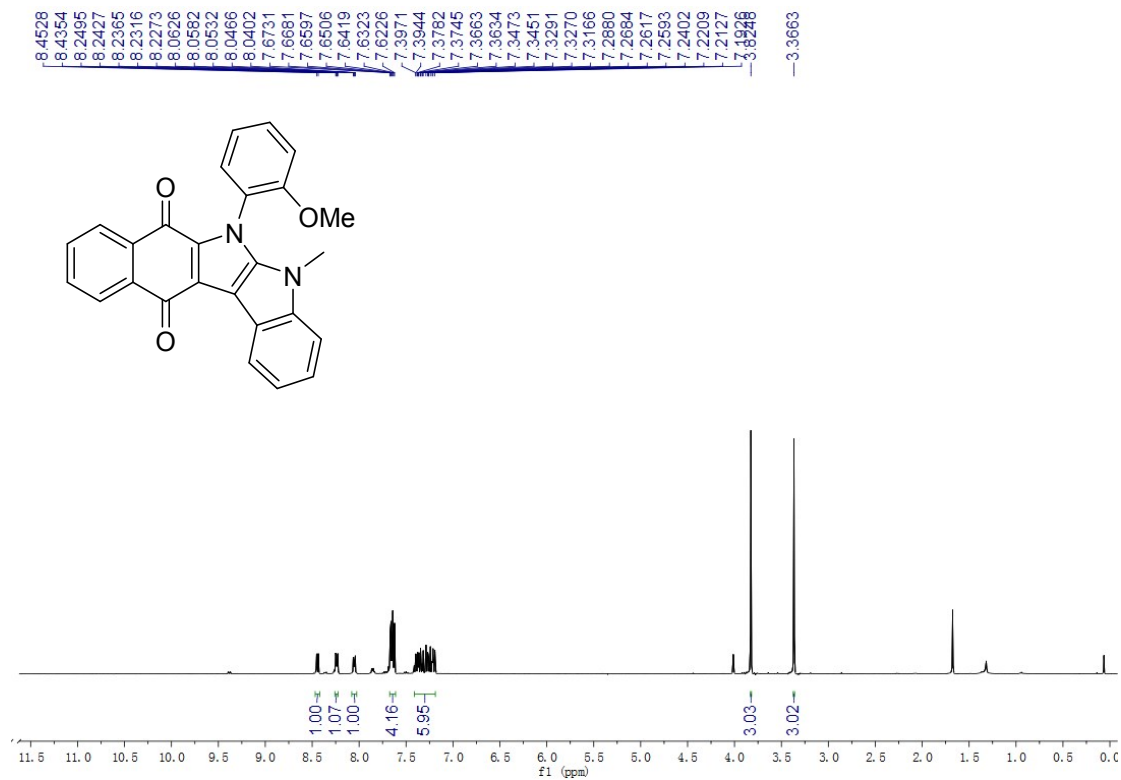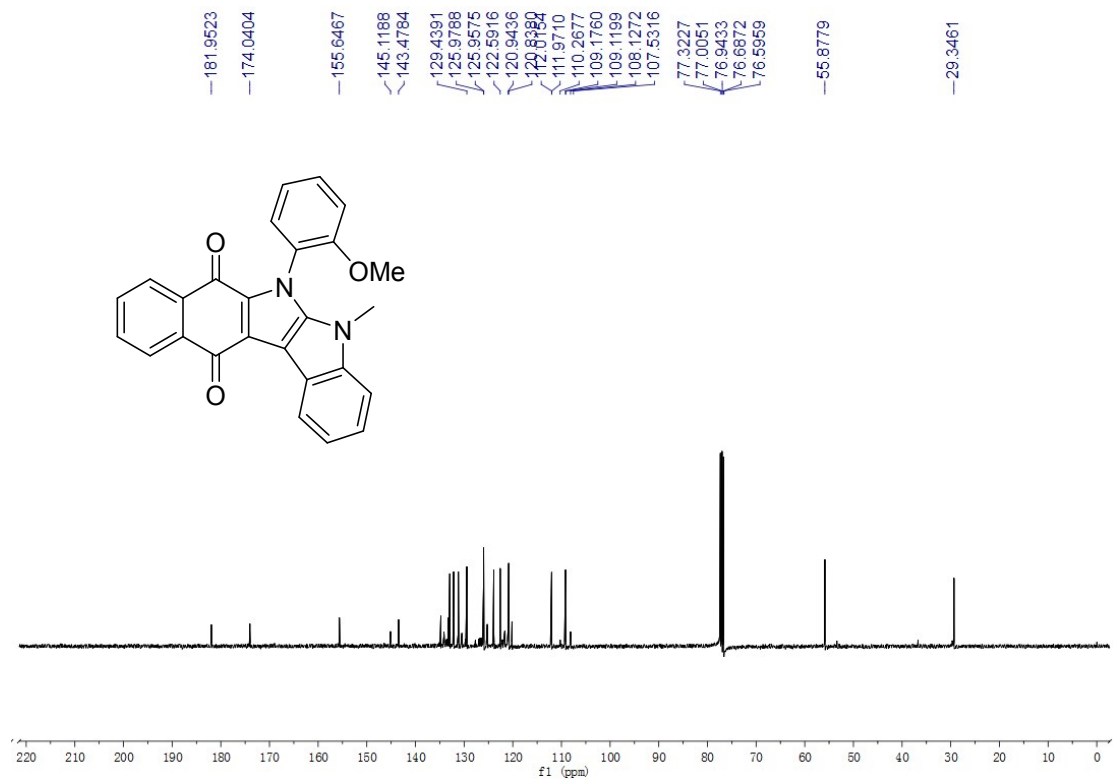

**6-(2-mercaptophenyl)-5-methyl-5,6-dihydrobenzo[f]indolo[2,3-b]indole-7,12-dione (3a)**

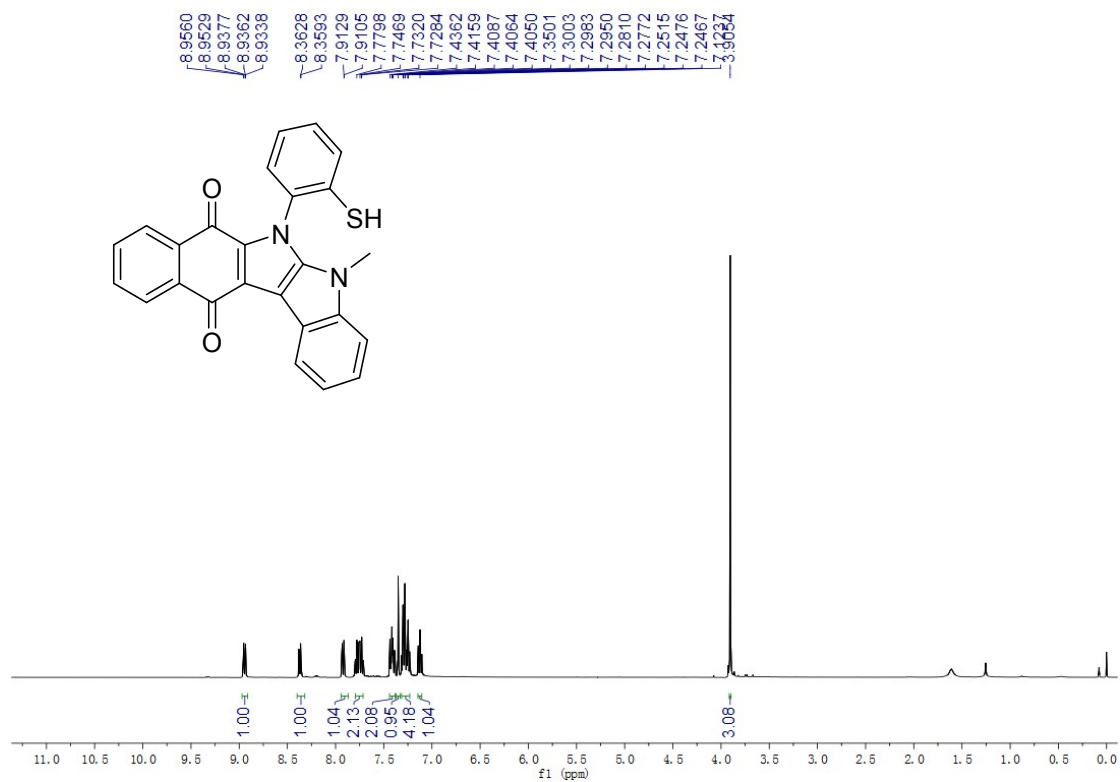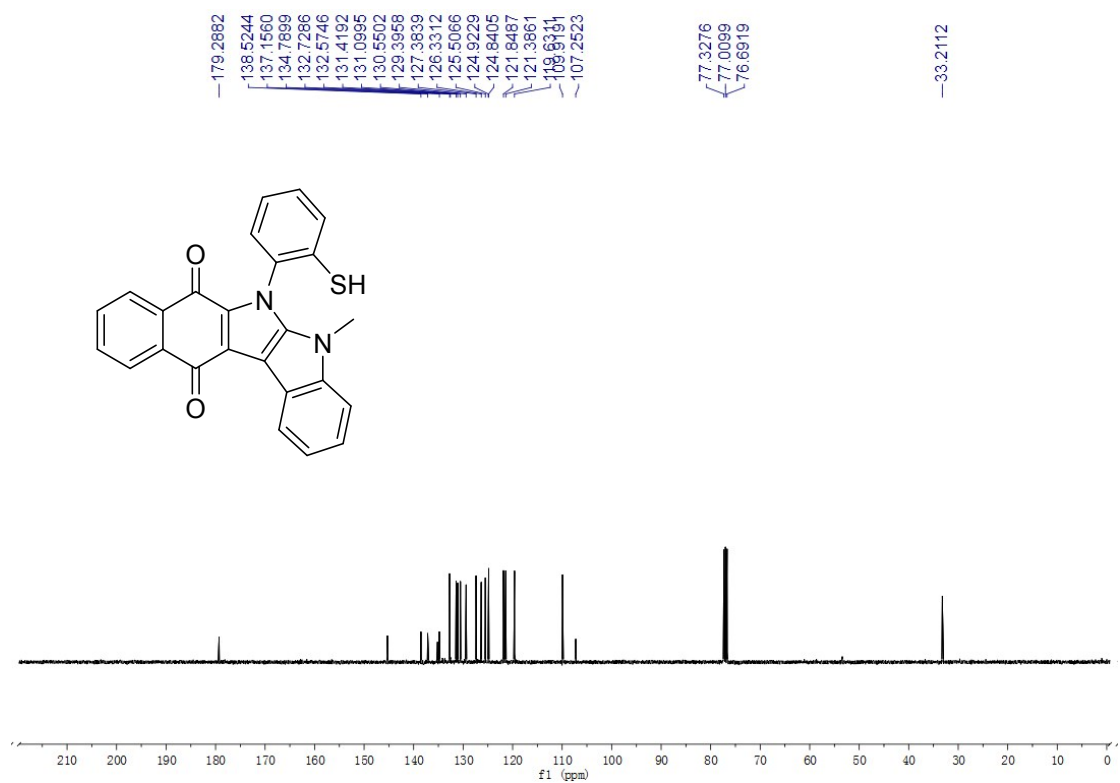

**6-(2-chlorophenyl)-5-methyl-5,6-dihydrobenzo[f]indolo[2,3-b]indole-7,12-dione  
(3am)**

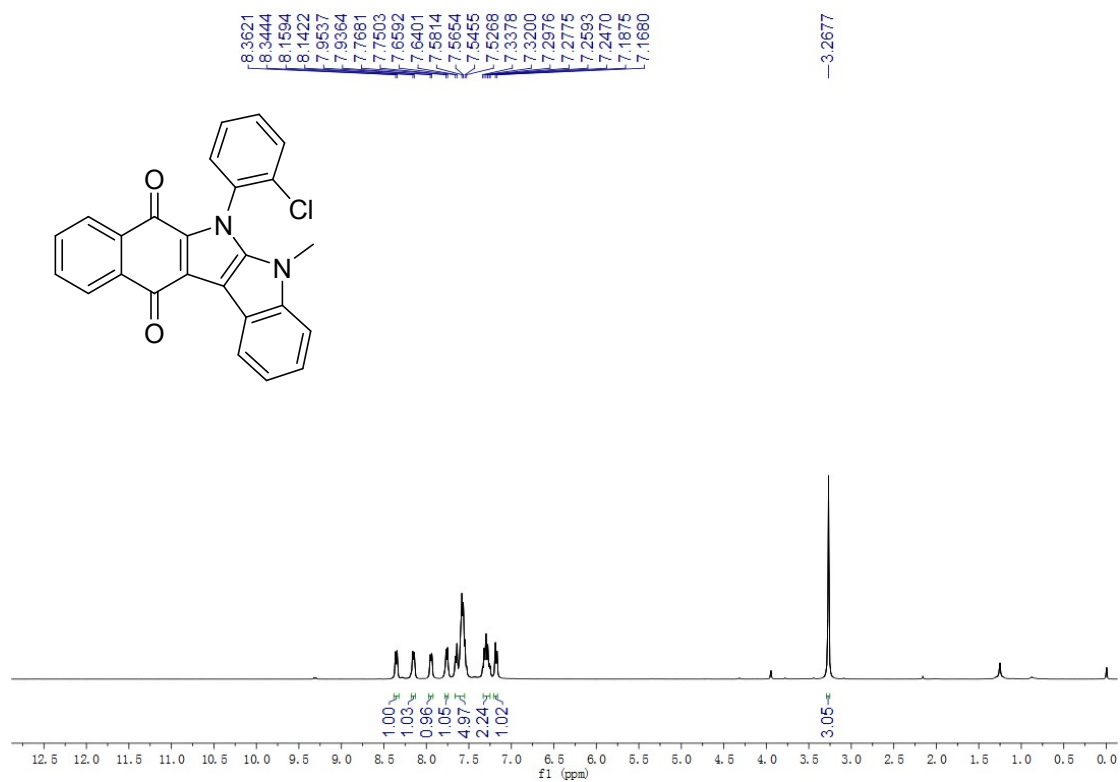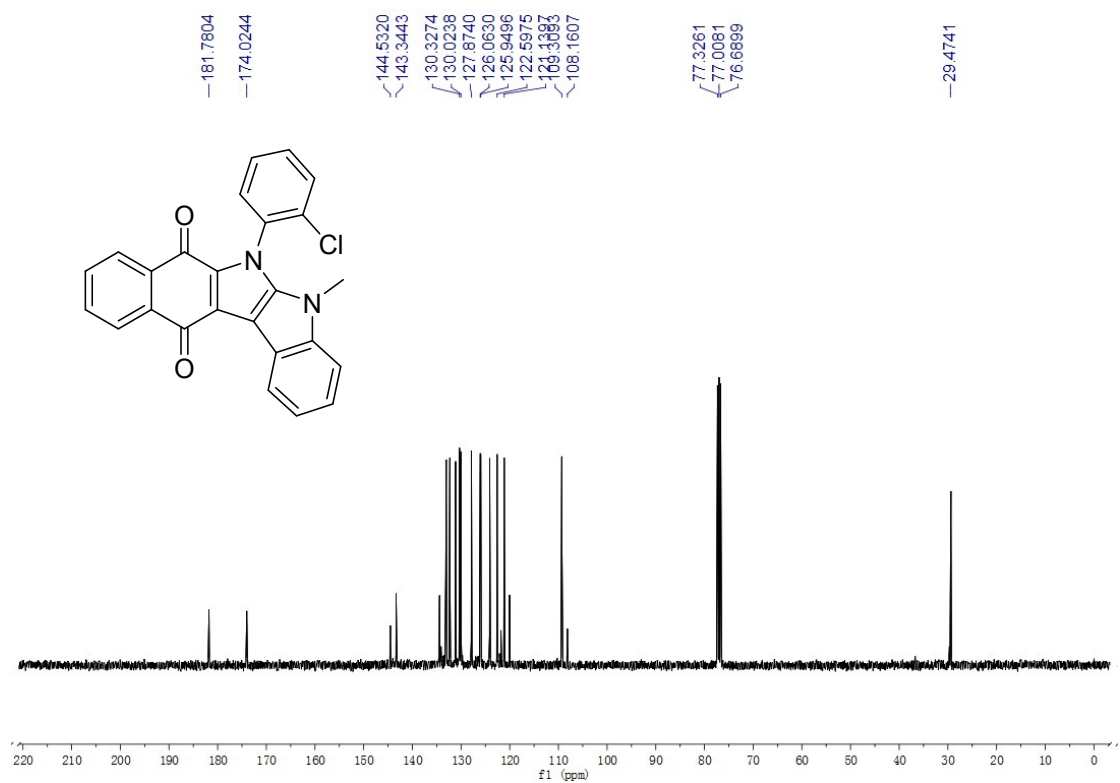



**6-(2-methoxy-4-methylphenyl)-5-methyl-5,6-dihydrobenzo[f]indolo[2,3-b]indole-7,12-dione (3an)**

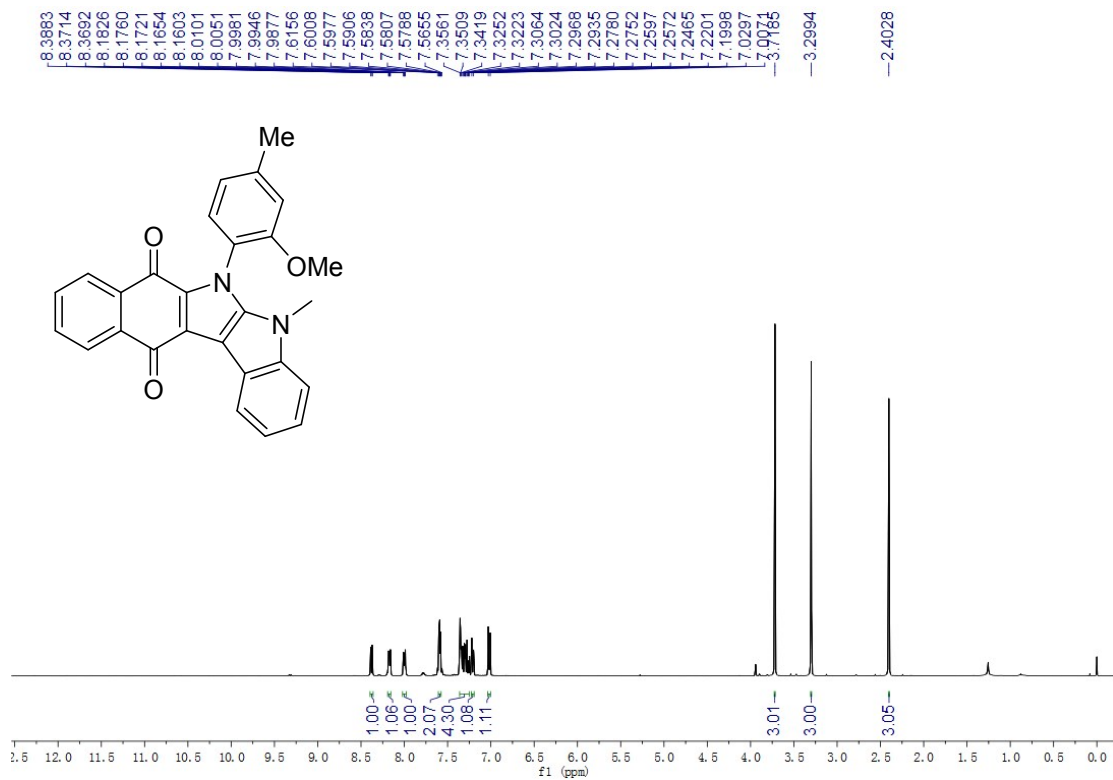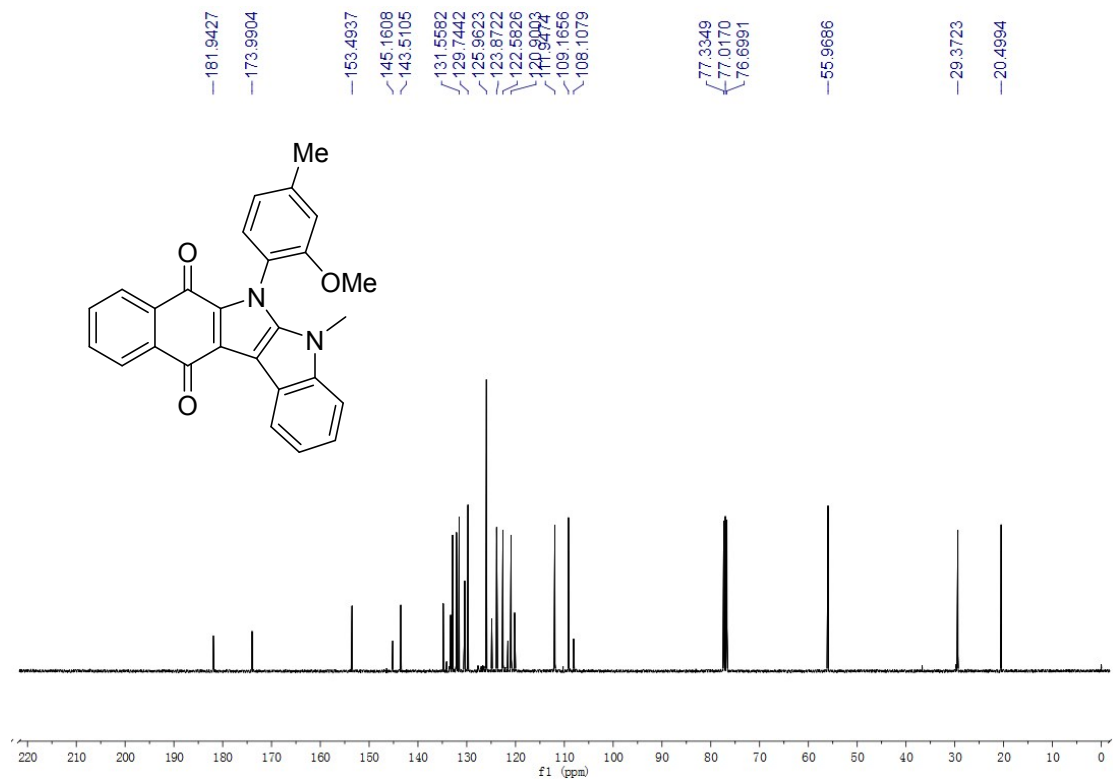

**6-(3,5-dimethoxyphenyl)-5-methyl-5,6-dihydrobenzo[f]indolo[2,3-b]indole-7,12-dione (3ao)**

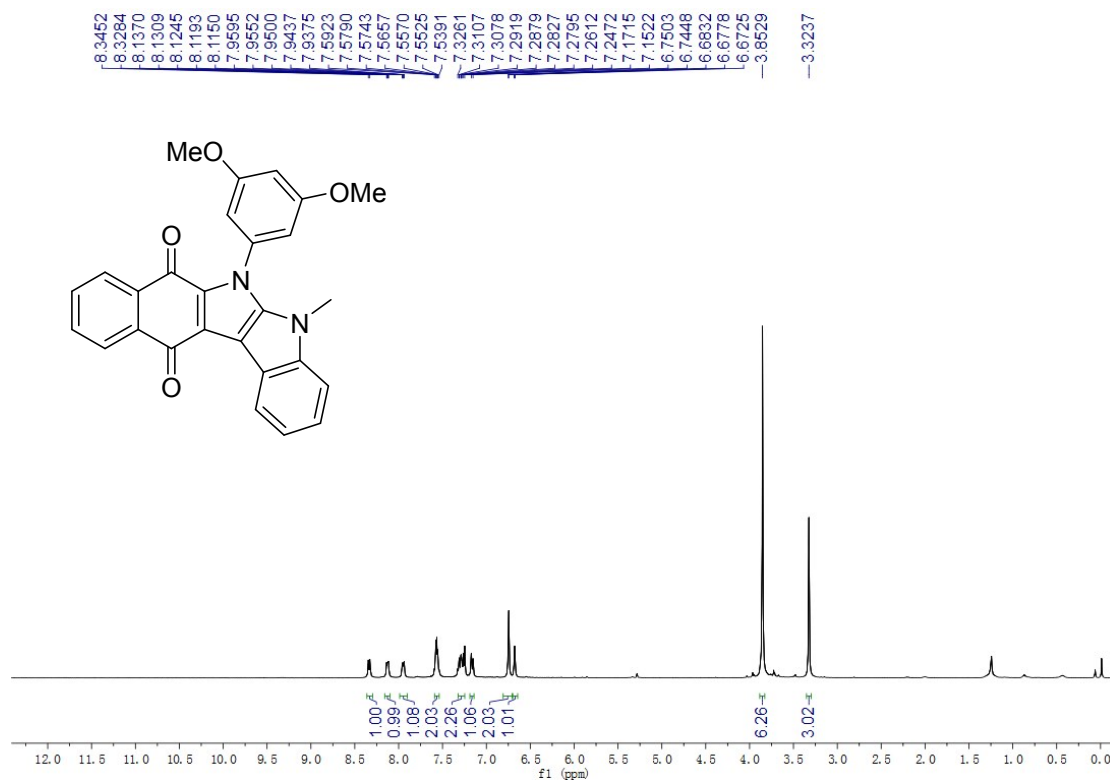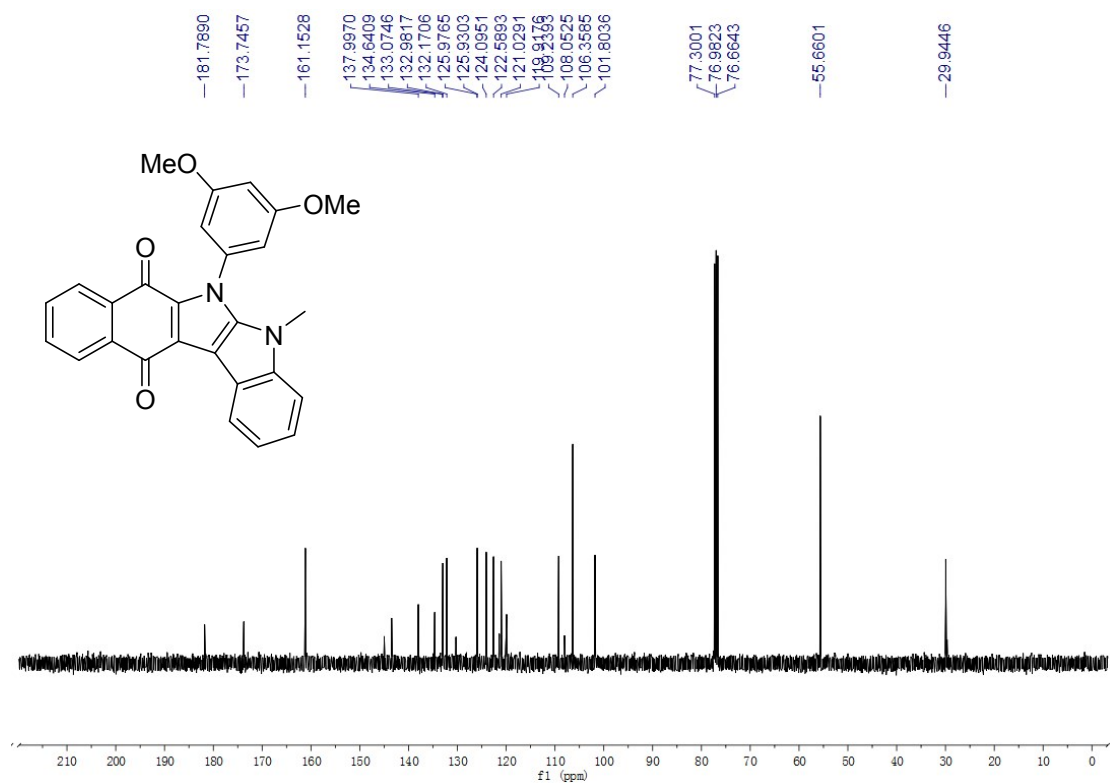

**6-(3,5-di-tert-butylphenyl)-5-methyl-5,6-dihydrobenzo[f]indolo[2,3-b]indole-7,12-dione (3ap)**

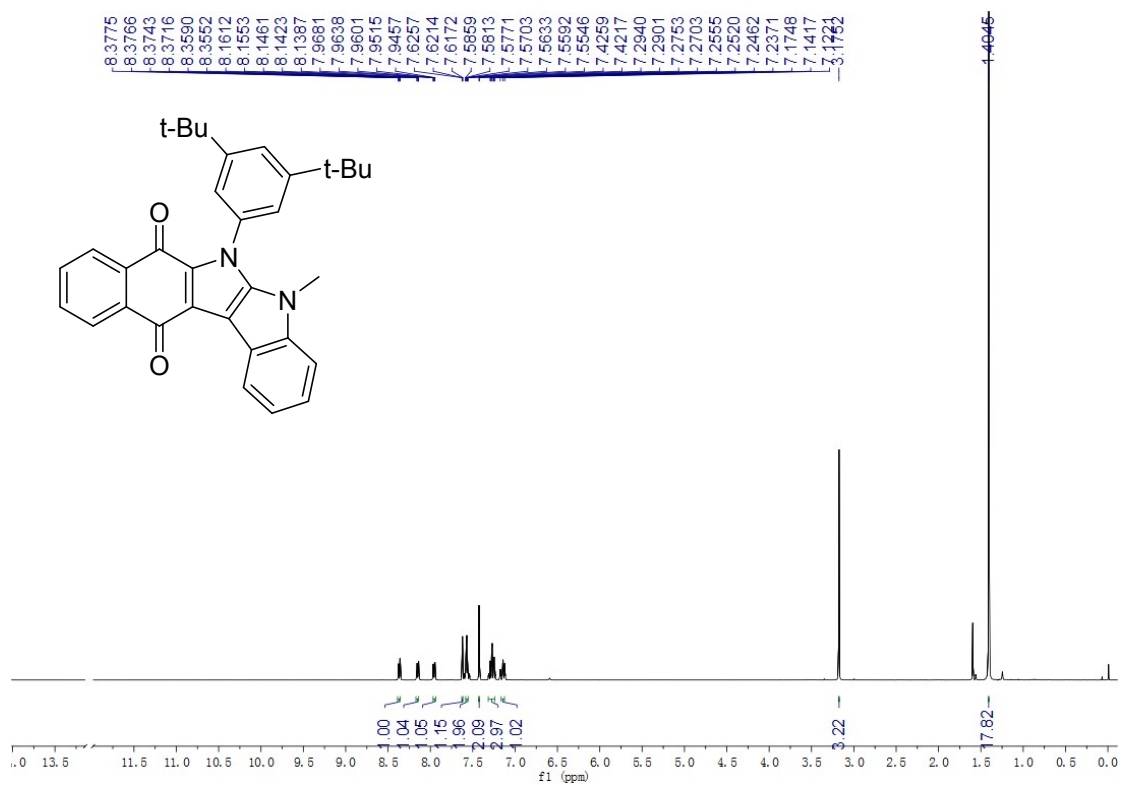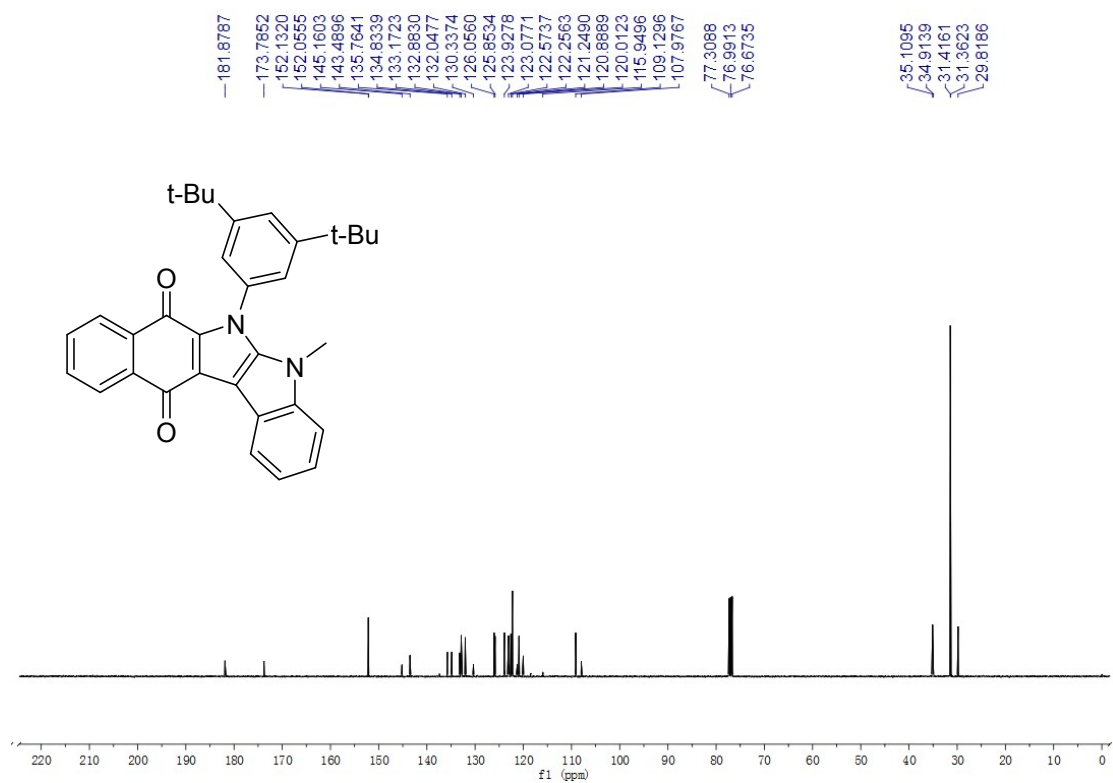

**5-methyl-6-(naphthalen-1-yl)-5,6-dihydrobenzo[f]indolo[2,3-b]indole-7,12-dione  
(3aq)**

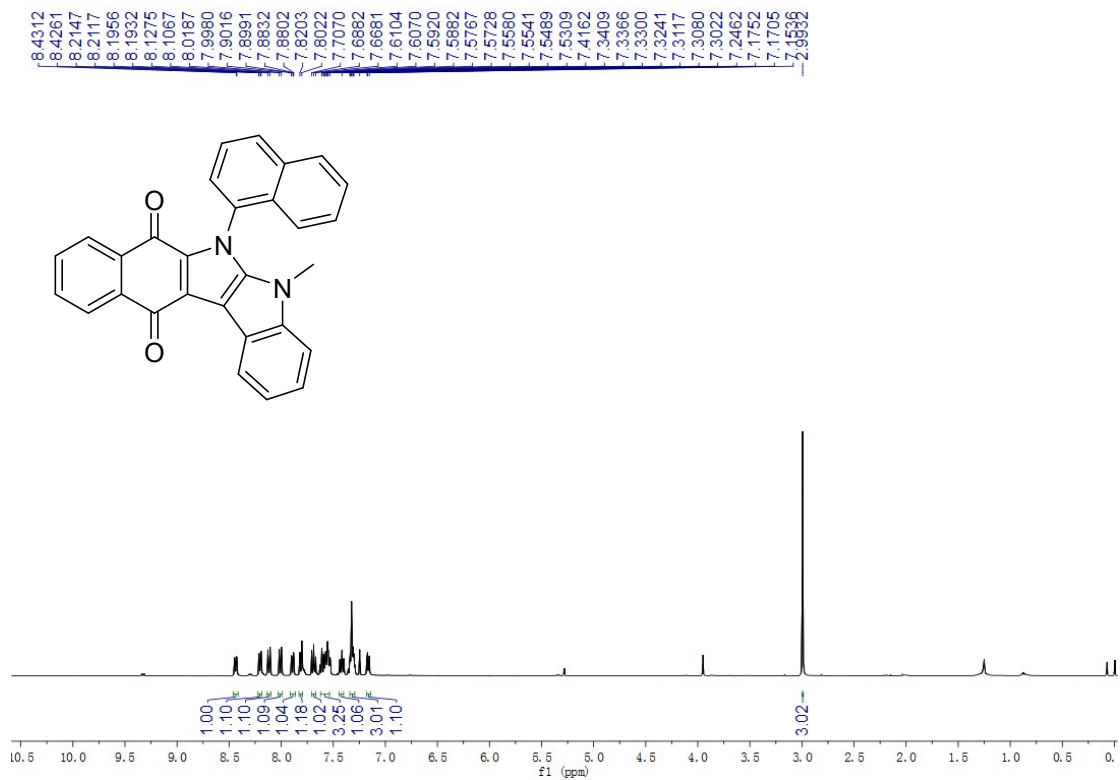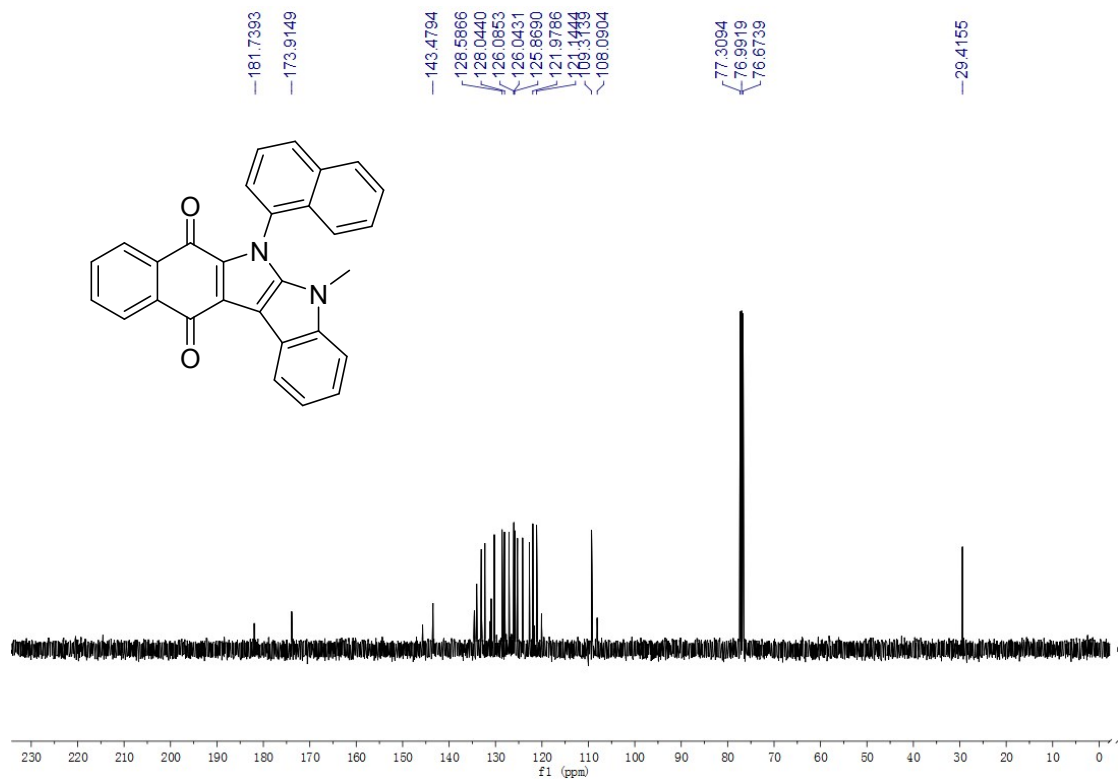

5-methyl-6-(pyren-1-yl)-5,6-dihydrobenzo[f]indolo[2,3-b]indole-7,12-dione (3ar)

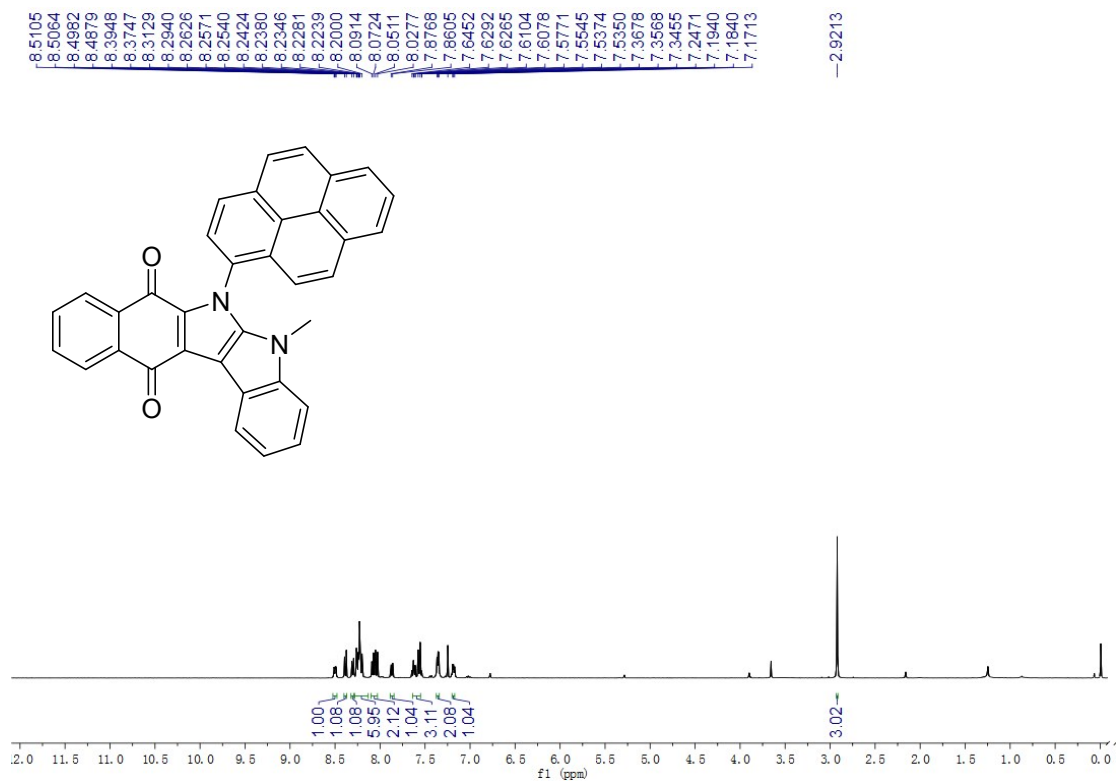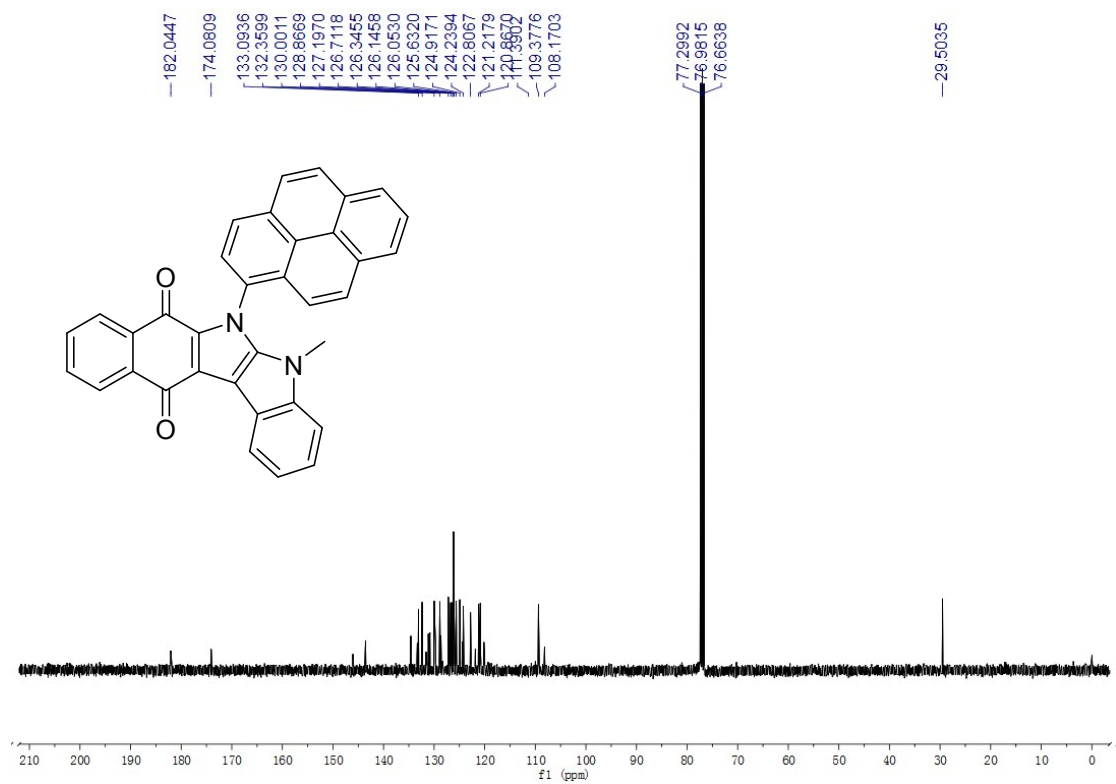

**6-(3-chloropyridin-4-yl)-5-methyl-5,6-dihydrobenzo[f]indolo[2,3-b]indole-7,12-dione (3as)**

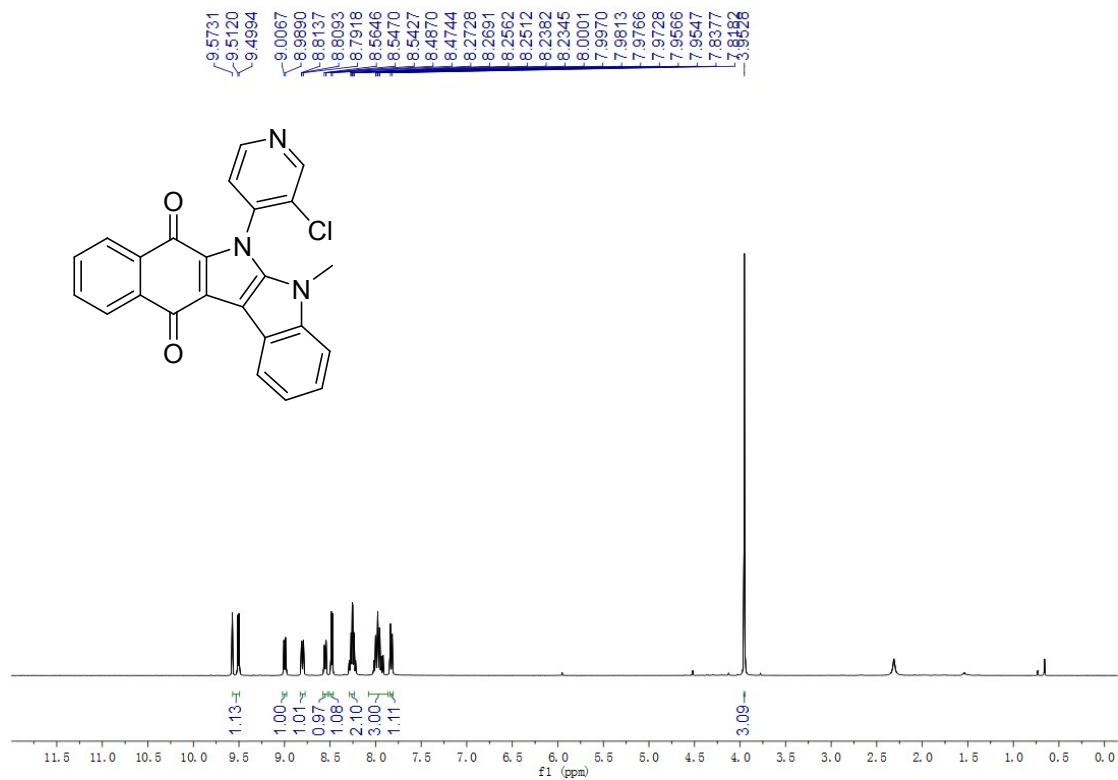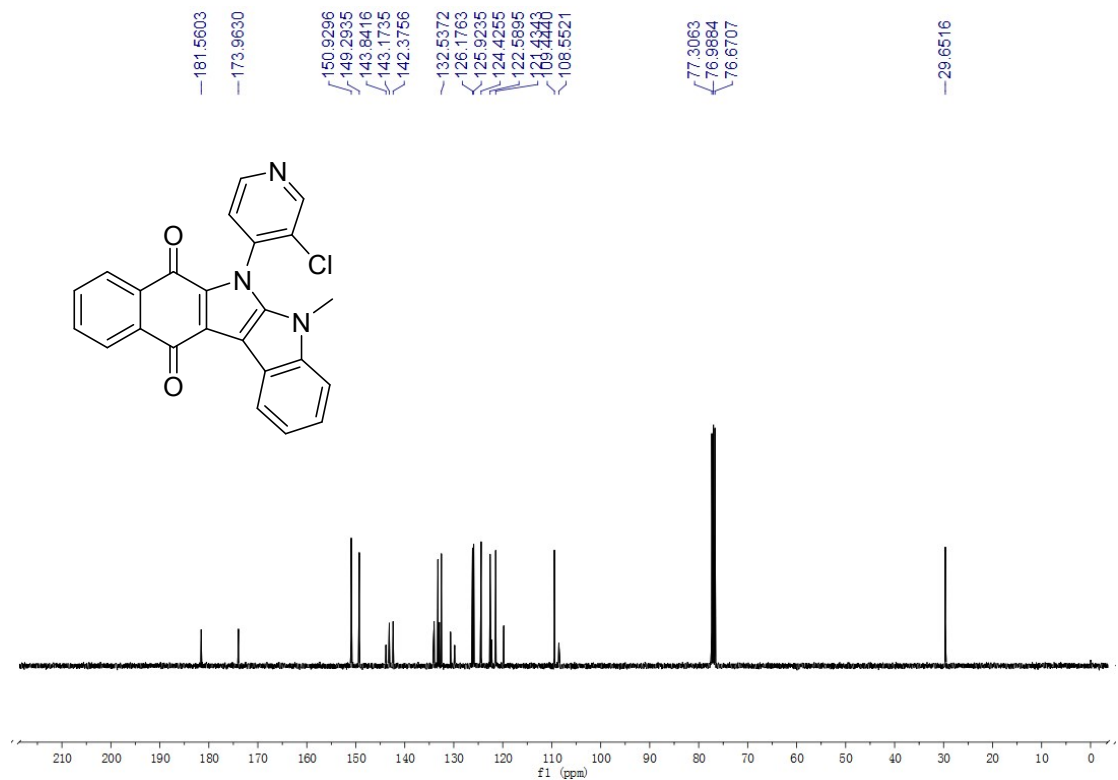

# 5-methyl-6-phenyl-5,6-dihydrobenzo[f]indolo[2,3-b]indole-7,12-dione (3aa)

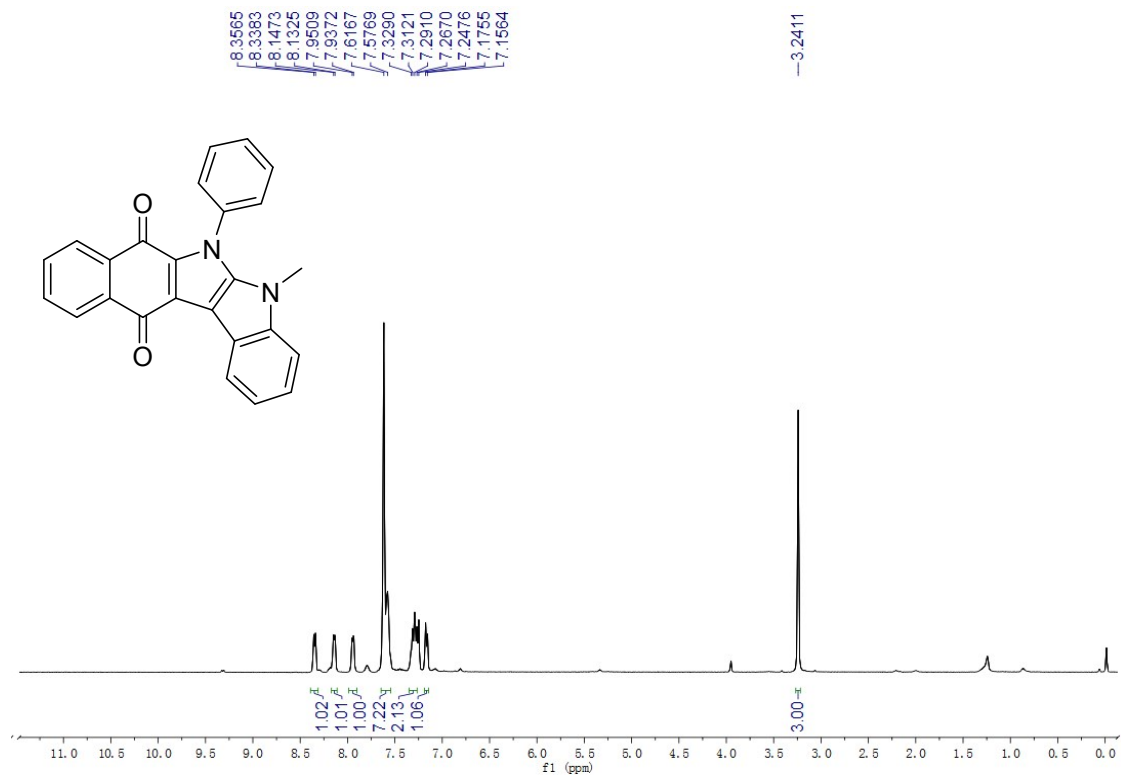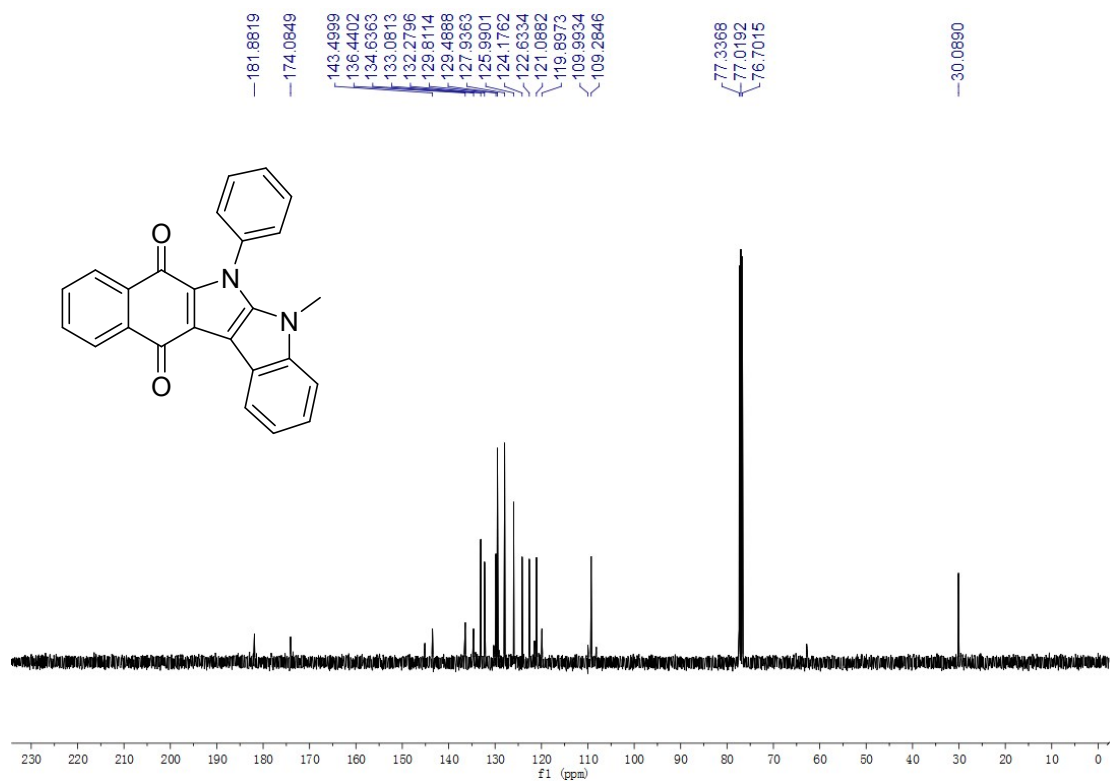

# 5-benzyl-6-phenyl-5,6-dihydrobenzo[f]indolo[2,3-b]indole-7,12-dione (3ba)

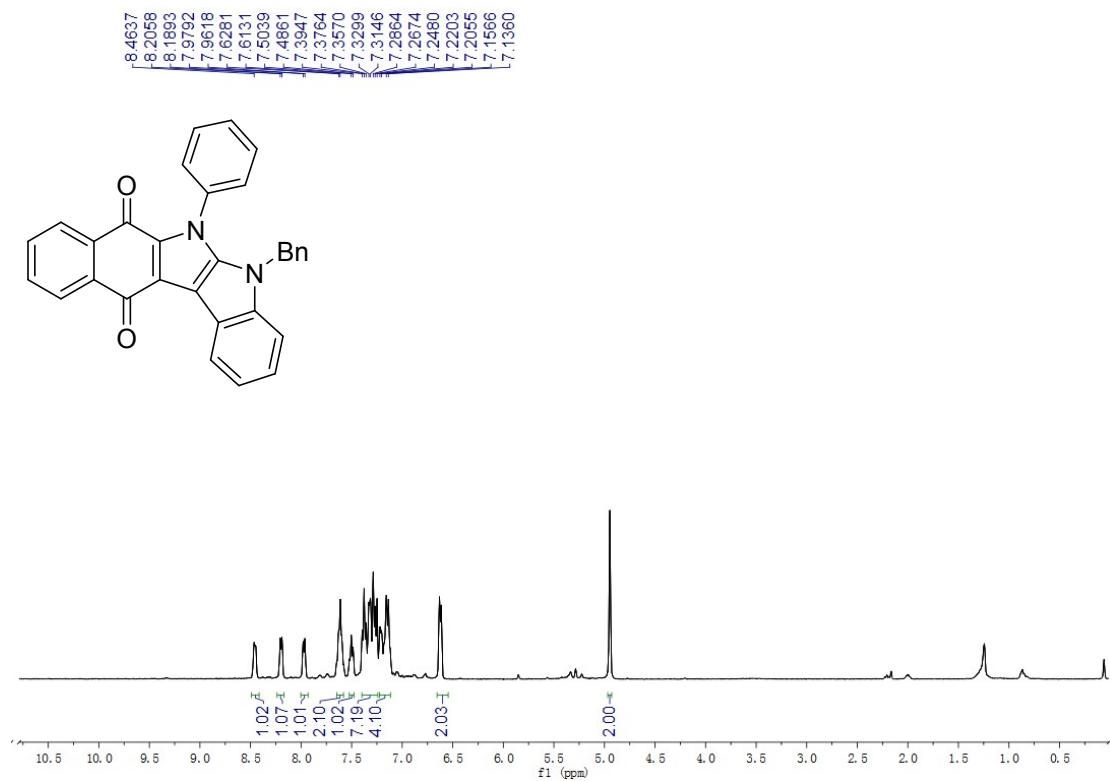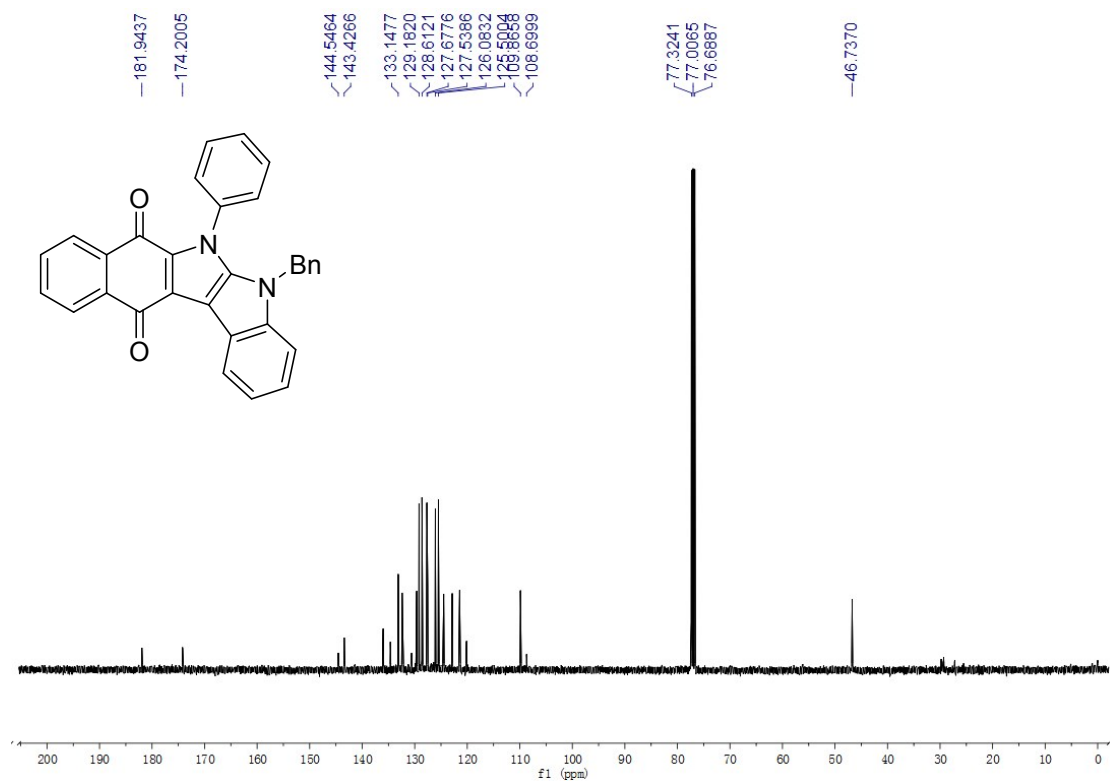



# 1,5-dimethyl-6-phenyl-5,6-dihydrobenzo[f]indolo[2,3-b]indole-7,12-dione (3da)

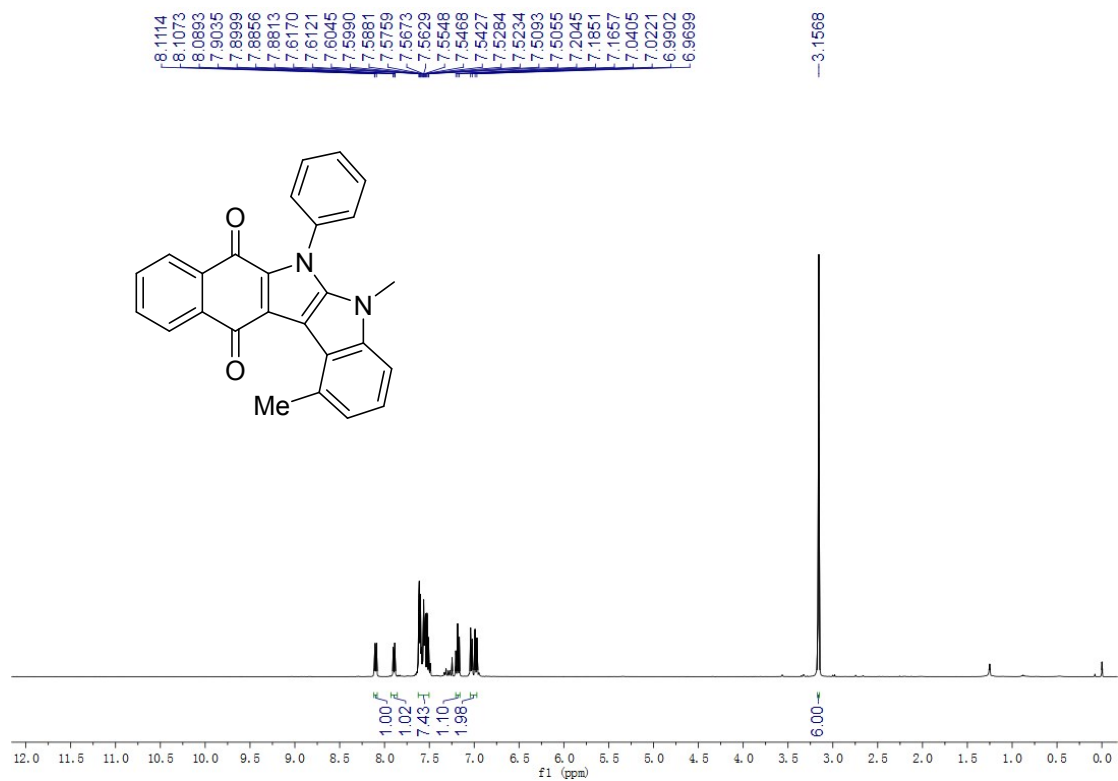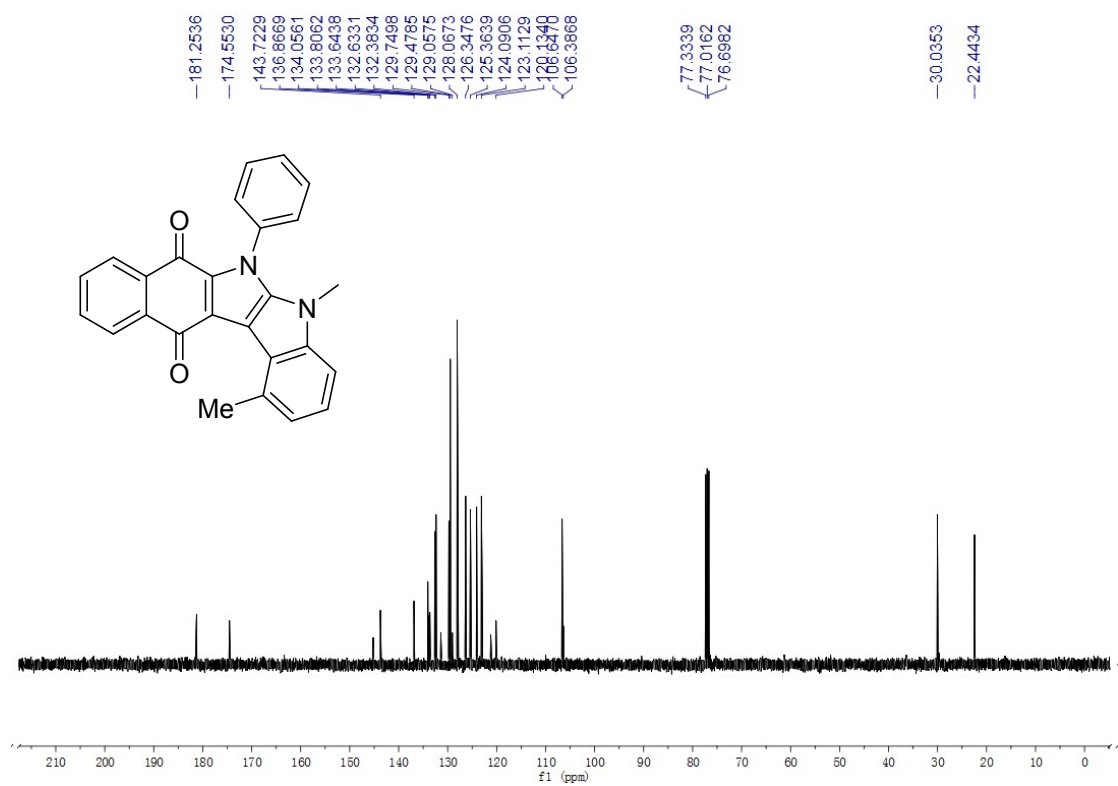

**2-methoxy-5-methyl-6-phenyl-5,6-dihydrobenzo[f]indolo[2,3-b]indole-7,12-dione  
(3ea)**

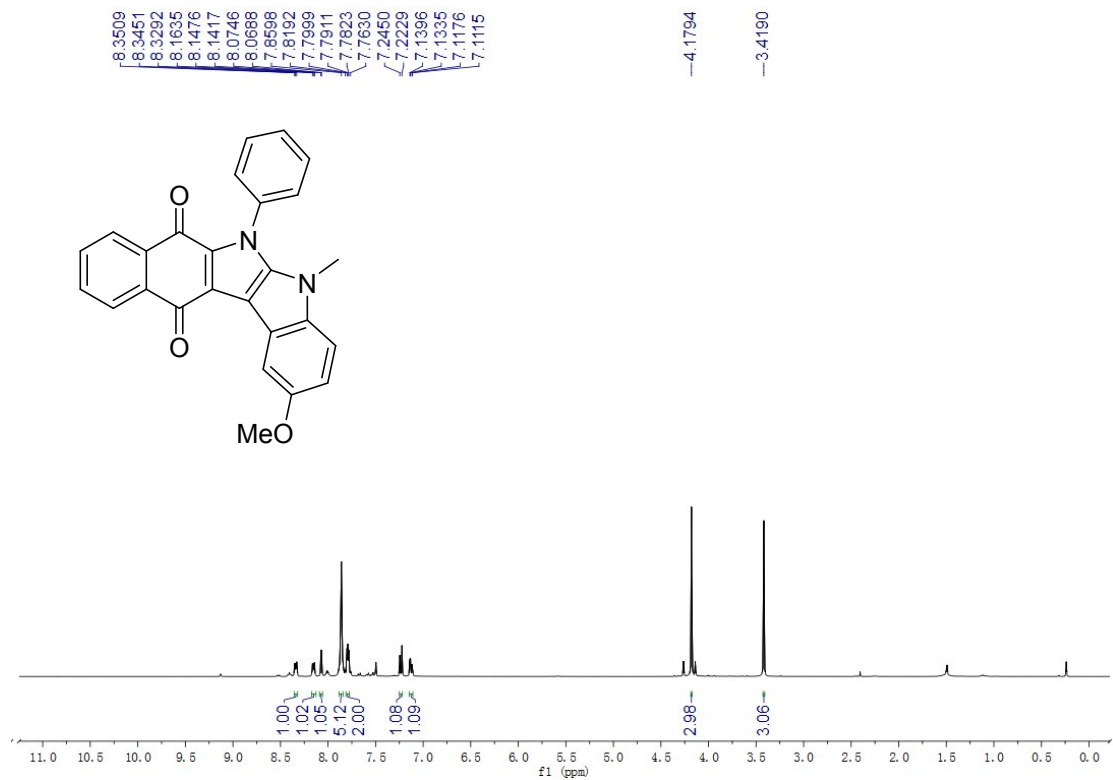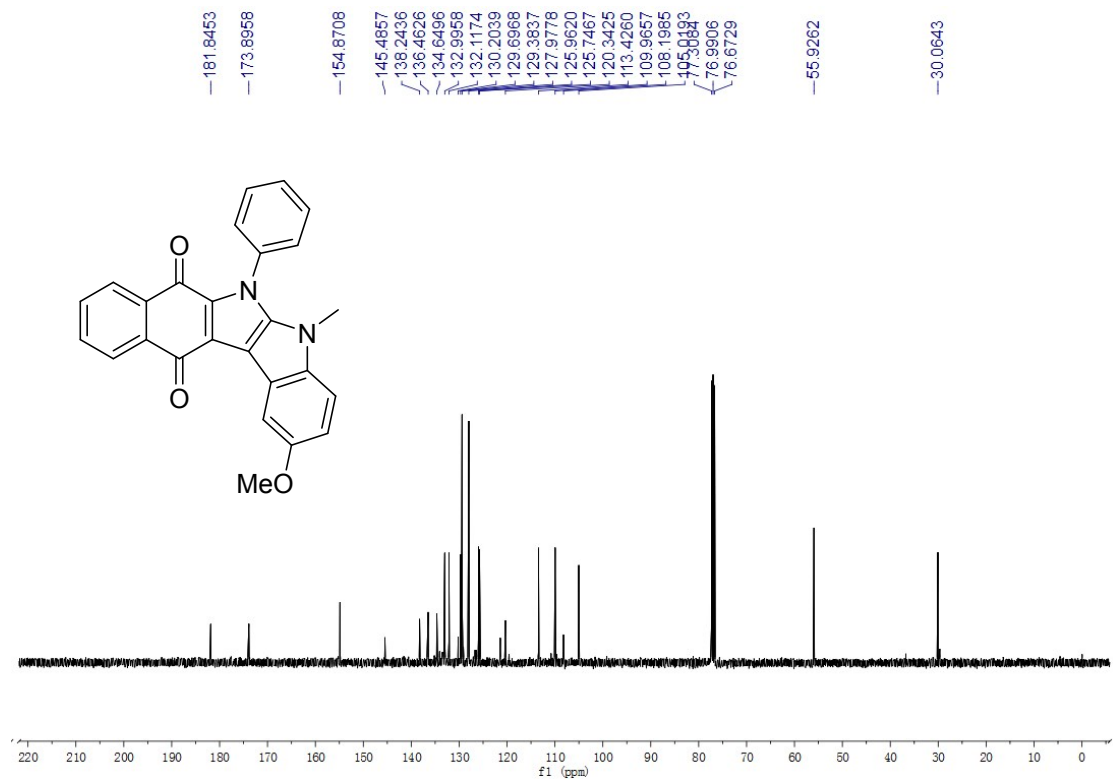

**2-chloro-5-methyl-6-phenyl-5,6-dihydrobenzo[f]indolo[2,3-b]indole-7,12-dione  
(3fa)**

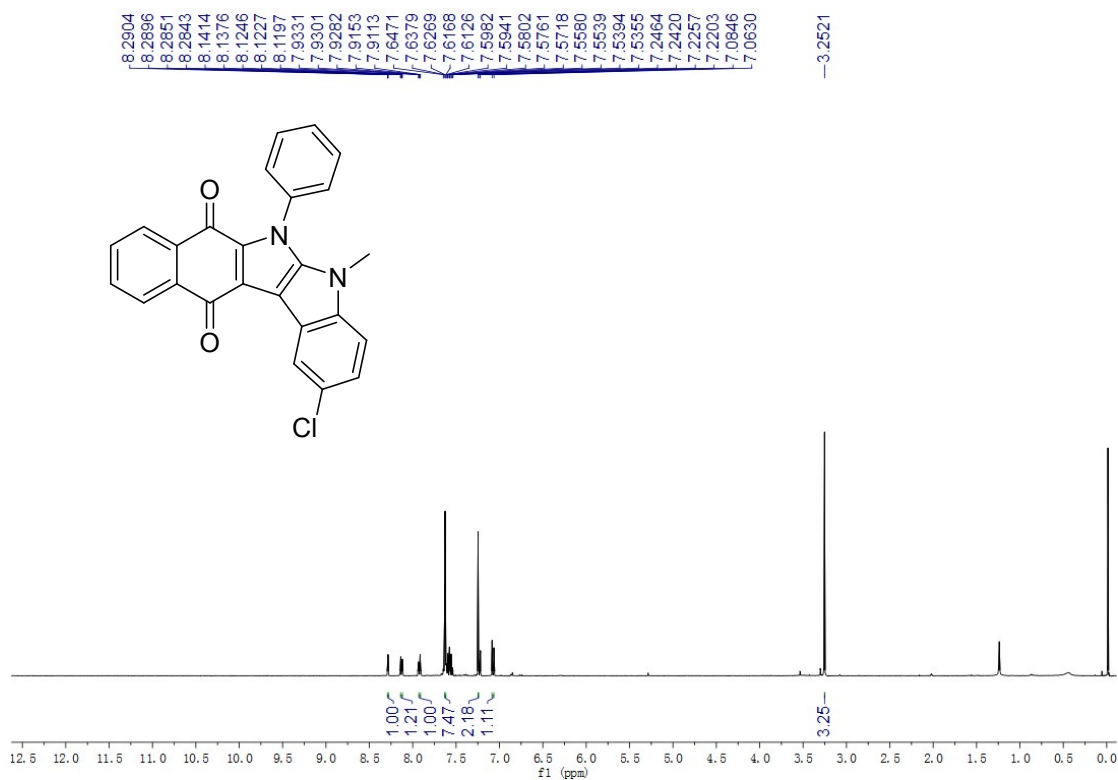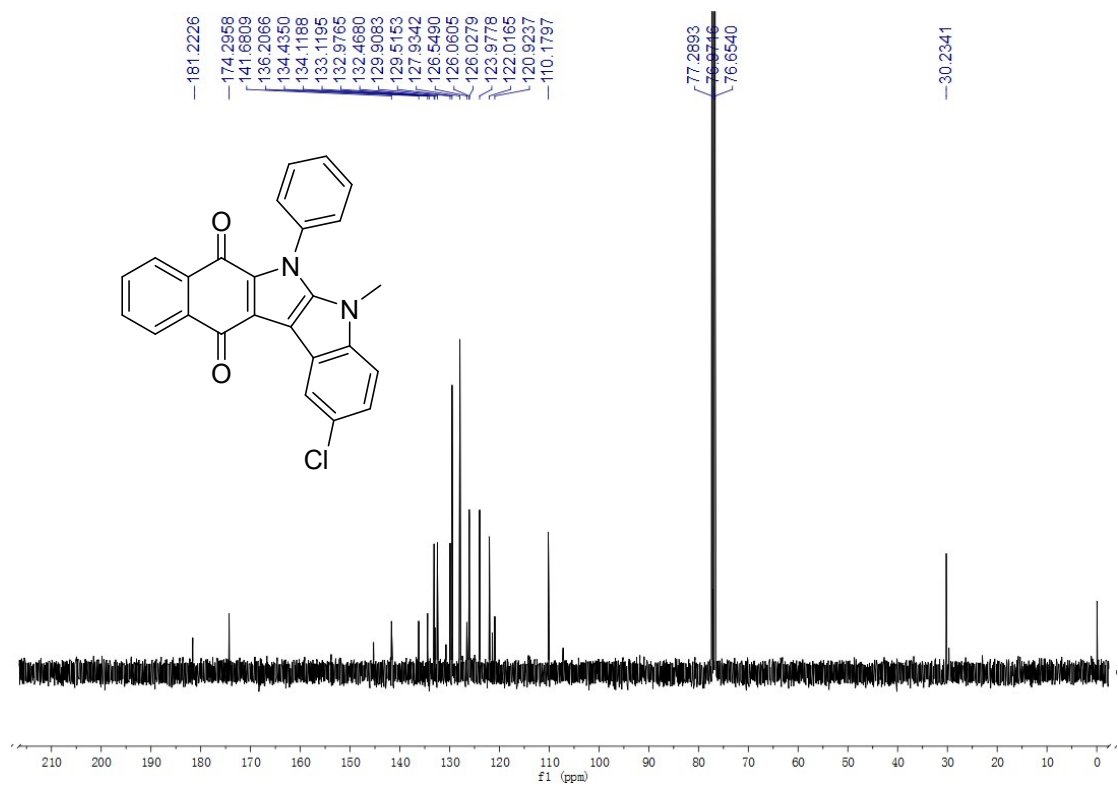

**2-bromo-5-methyl-6-phenyl-5,6-dihydrobenzo[f]indolo[2,3-b]indole-7,12-dione (3ga)**

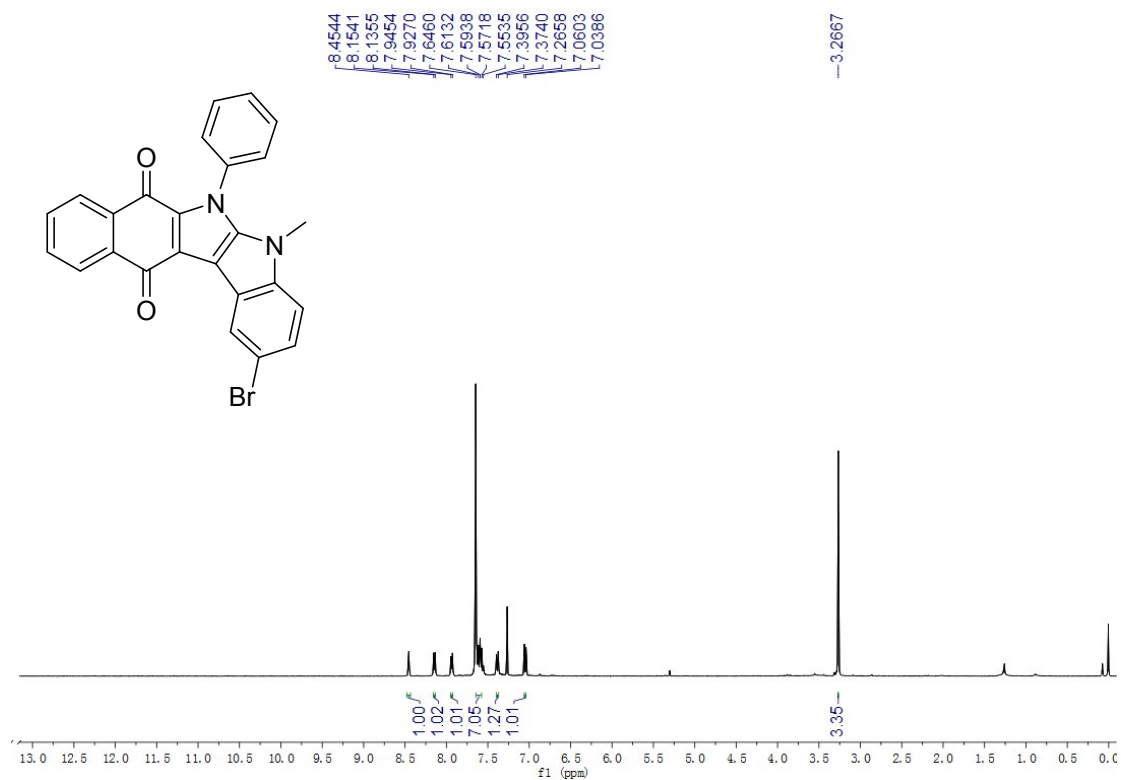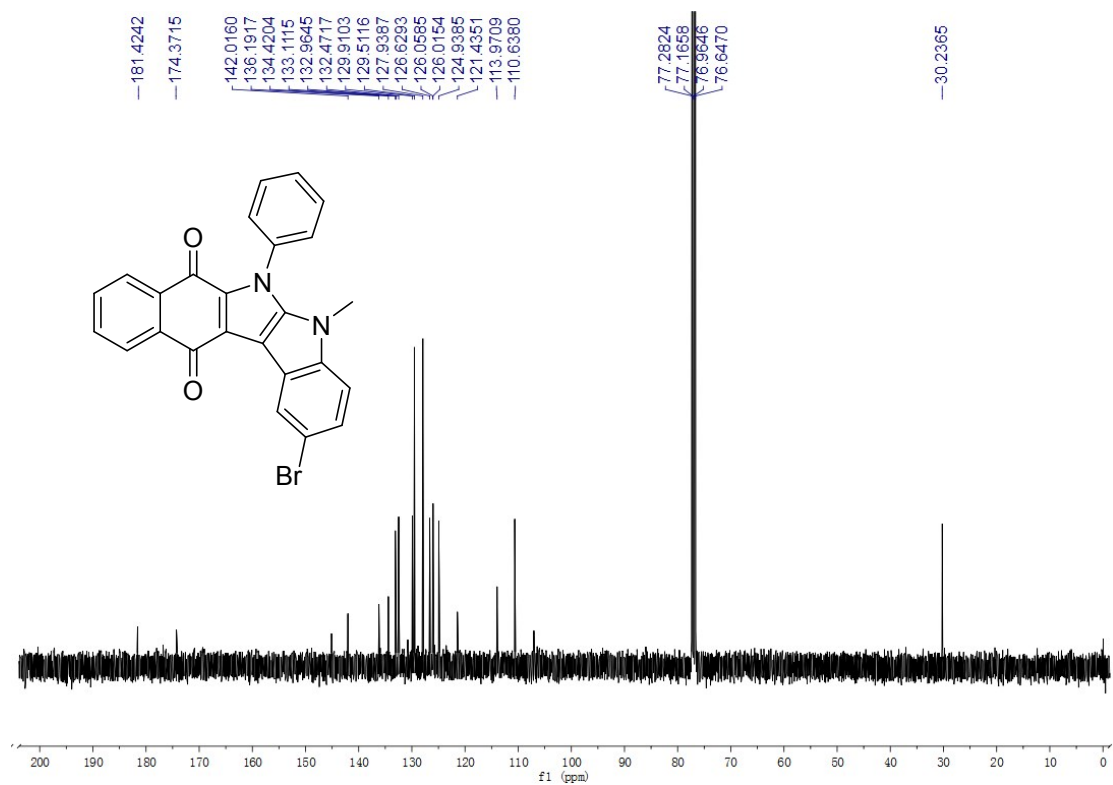

**3-fluoro-5-methyl-6-phenyl-5,6-dihydrobenzo[f]indolo[2,3-b]indole-7,12-dione (3ha)**

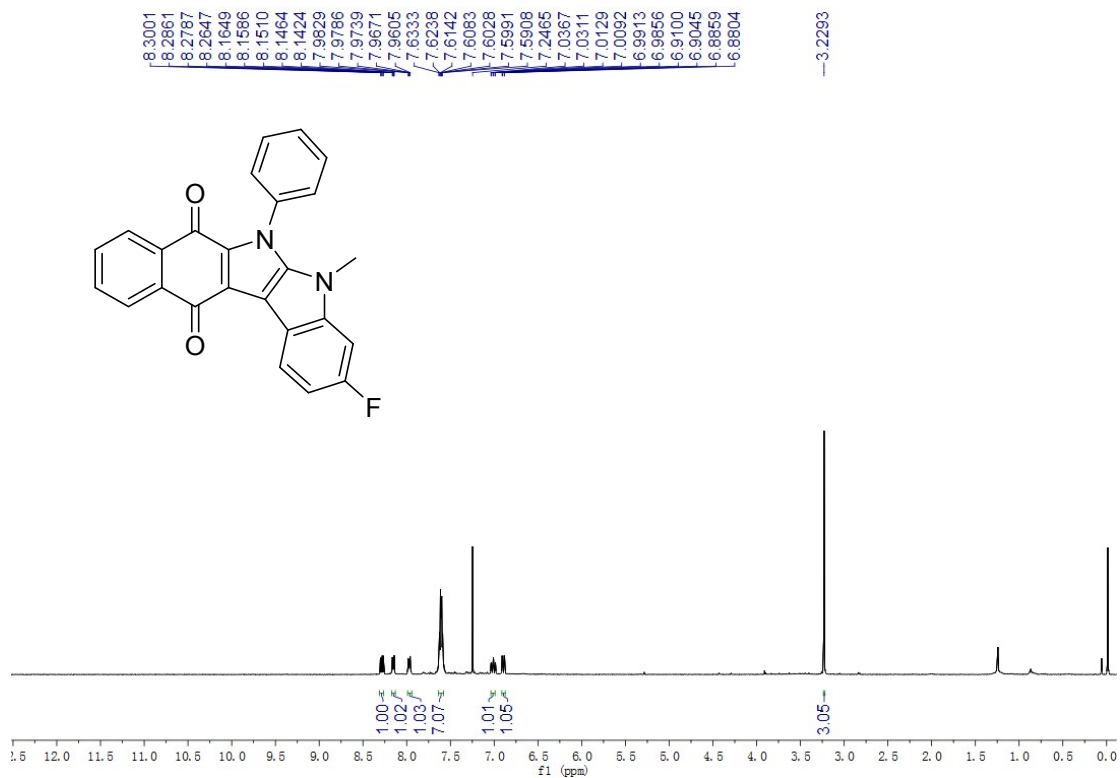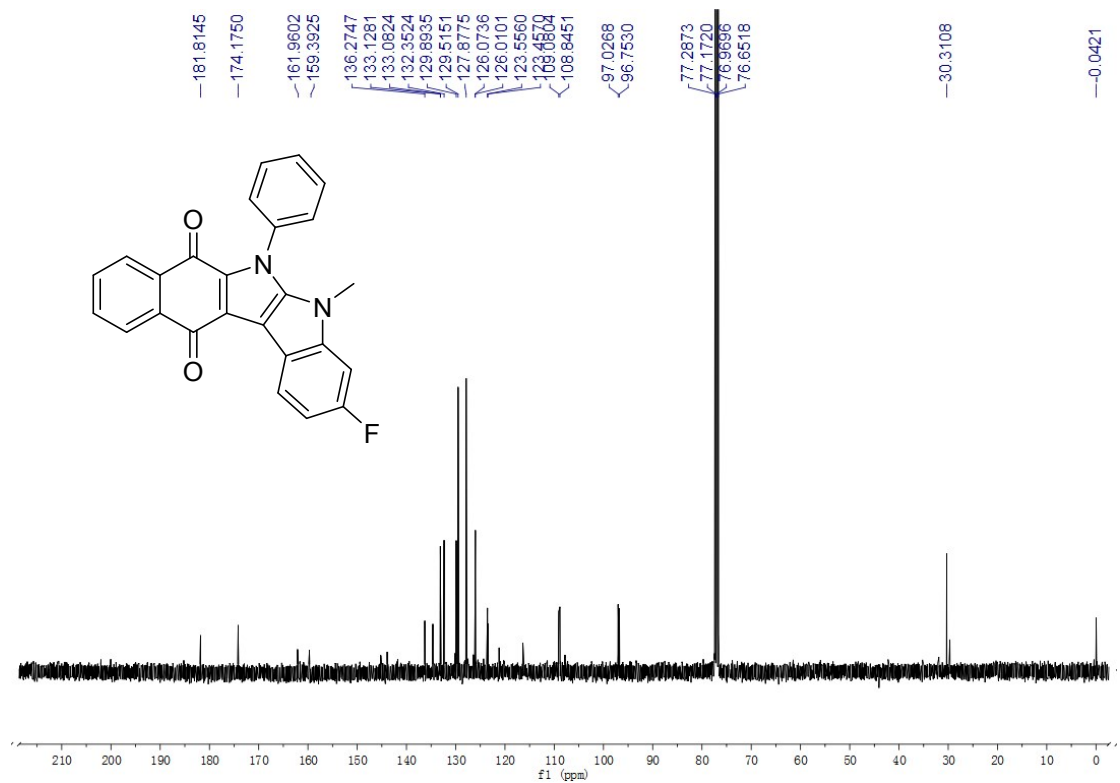

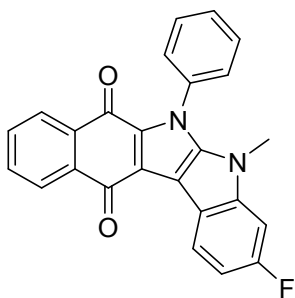

--115.9542

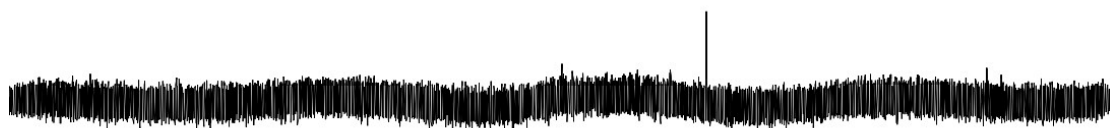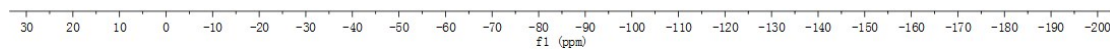

### 4,5-dimethyl-6-phenyl-5,6-dihydrobenzo[f]indolo[2,3-b]indole-7,12-dione (3ia)

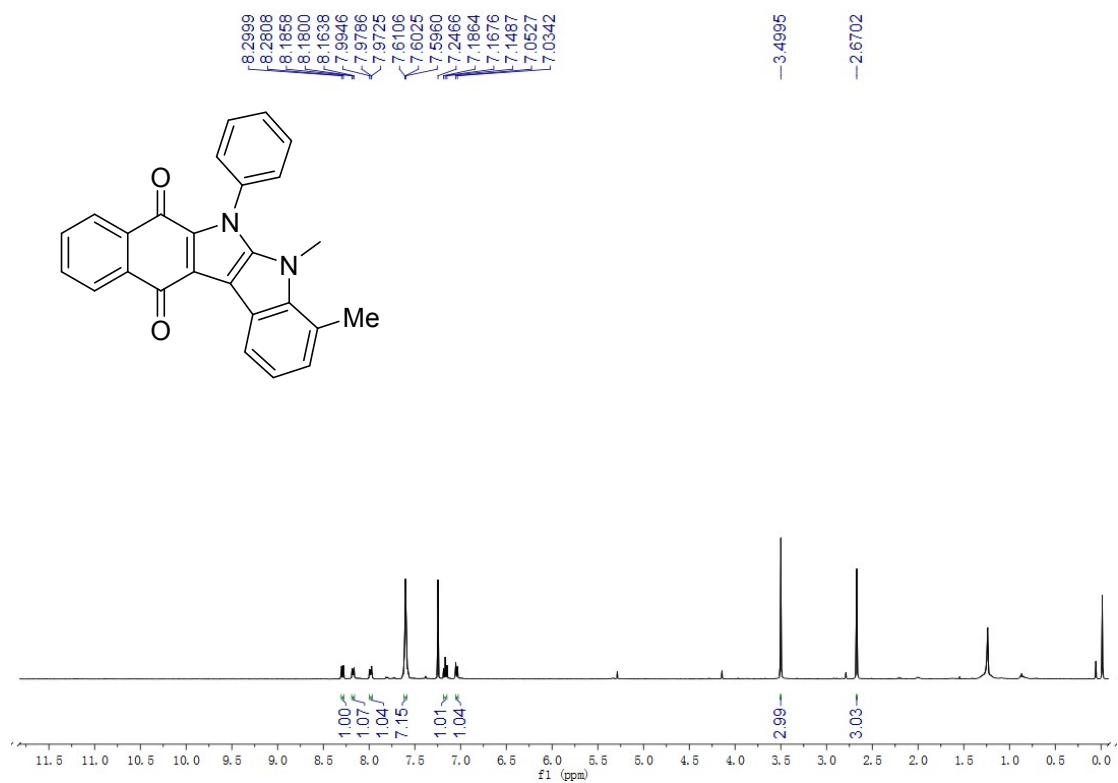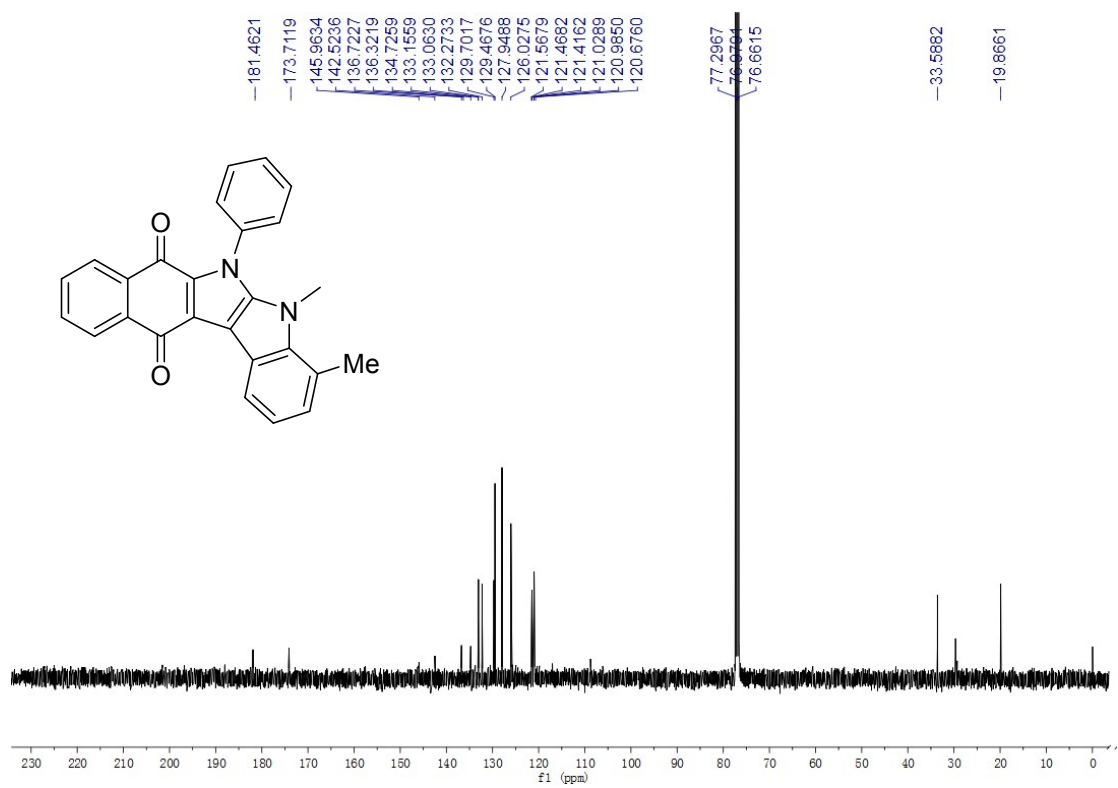

### 5-methyl-6-phenyl-5,6-dihydroindolo[2,3-b]naphtho[2,3-f]indole-7,14-dione (3ja)

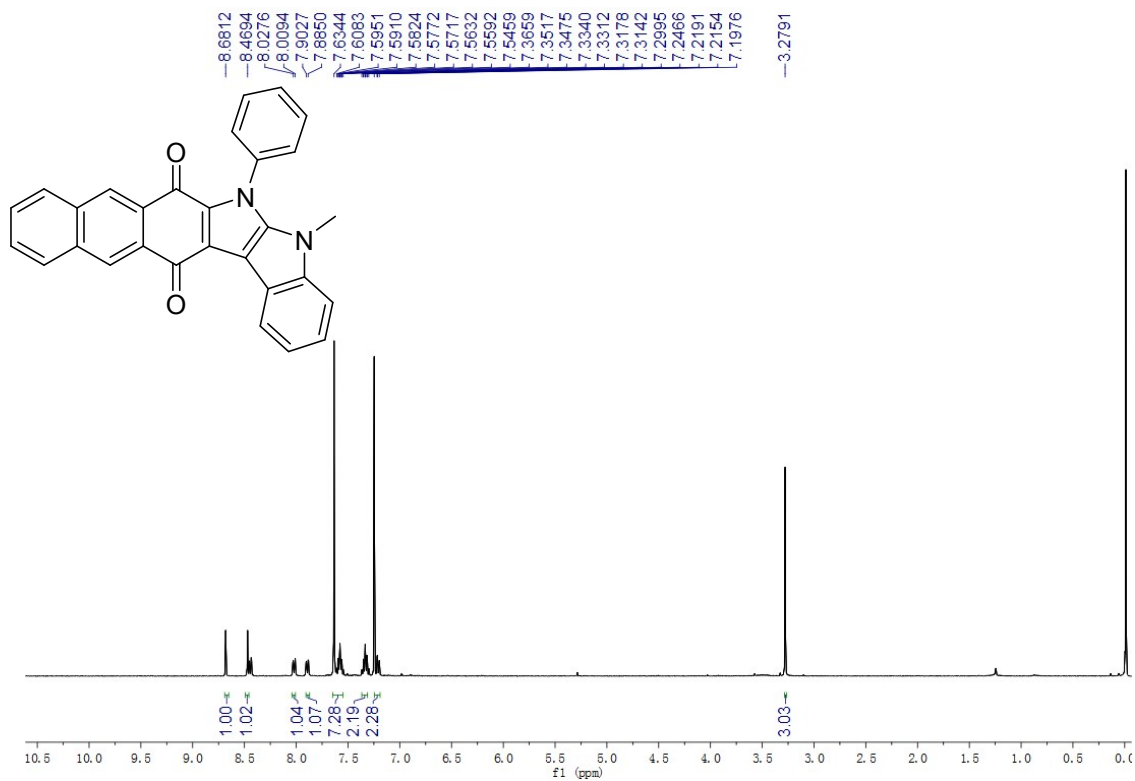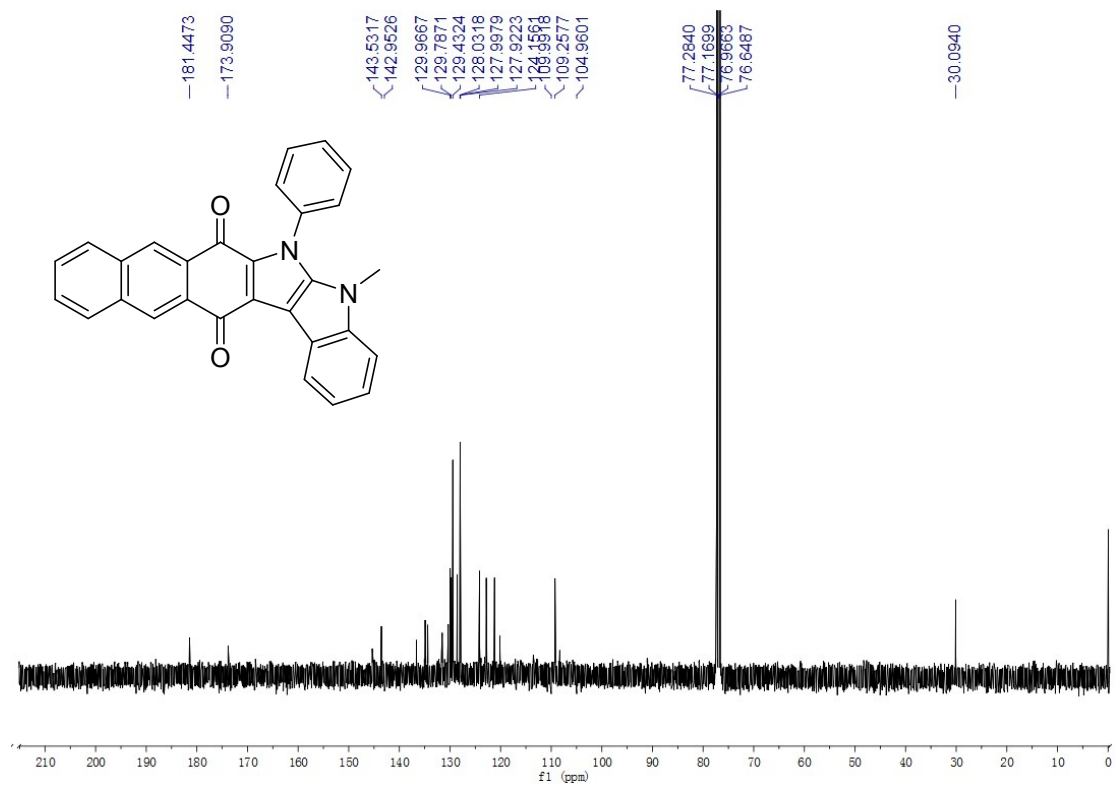

Supplement: d1ob00666e1.pdf [file d1ob00666e1.pdf]
